# Supplementary material for: Molecular basis for differential activation of p101 and p84 complexes of PI3Kγ by Ras and GPCRs
Source: PubMed Central journal article supplement — Cell Rep. 2023 Feb 26;42(3):112172. doi: 10.1016/j.celrep.2023.112172 (PMC10068899; doi:10.1016/j.celrep.2023.112172), 2023-02-26
Supplement: mmc6.pdf [file mmc6.pdf]

# Molecular basis for differential activation of p101 and p84 complexes of PI3K $\gamma$ by Ras and GPCRs

## Graphical abstract

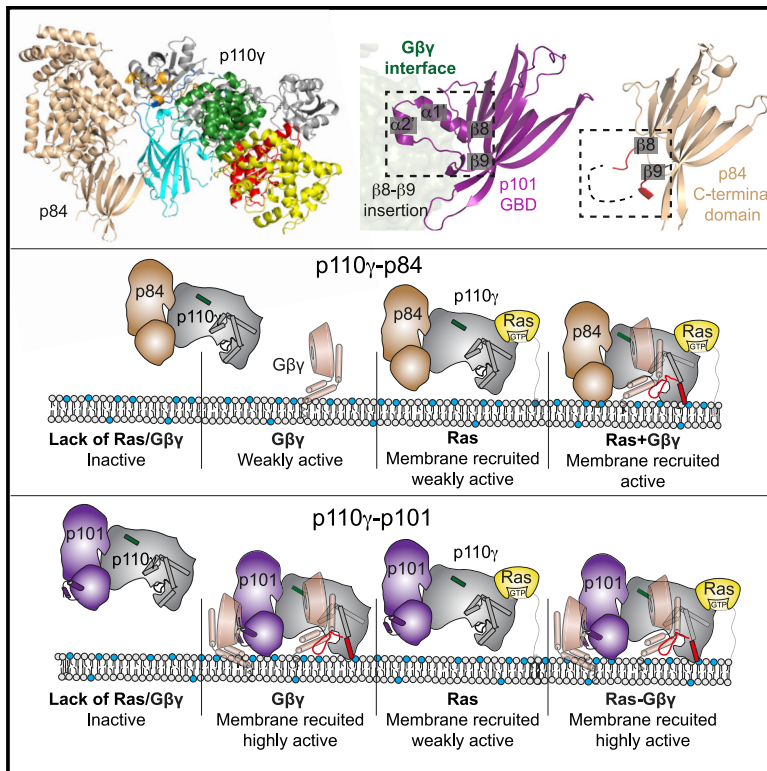

## Authors

Manoj K. Rathinaswamy,  
Meredith L. Jenkins,  
Benjamin R. Duewell, ...,  
Roger L. Williams, Scott D. Hansen,  
John E. Burke

## Correspondence

shansen5@uoregon.edu (S.D.H.),  
jeburke@uvic.ca (J.E.B.)

## In brief

PI3K $\gamma$  is a master regulator of PI(3,4,5)P $_3$  synthesis during immune cell signaling and consists of two complexes (p110 $\gamma$ -p101 and p110 $\gamma$ -p84) that are differentially activated. Here, Rathinaswamy et al., using structural and biophysical approaches, reveal how Ras and GPCRs distinctly activate PI3K $\gamma$  complexes. This has relevance for developing future anti-PI3K $\gamma$  therapeutics.

## Highlights

- Structure of p110 $\gamma$ -p84 reveals mechanism of differential stability compared with p110 $\gamma$ -p101
- p110 $\gamma$ -p84 requires Ras for robust membrane activation by G $\beta\gamma$  subunits
- Identification of G $\beta\gamma$  binding site in both p101 and p110 $\gamma$
- A unique p101 extension mediates differential GPCR sensitivity compared with p84

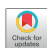

## Article

# Molecular basis for differential activation of p101 and p84 complexes of PI3K $\gamma$ by Ras and GPCRs

Manoj K. Rathinaswamy,<sup>1,6</sup> Meredith L. Jenkins,<sup>1,6</sup> Benjamin R. Duewell,<sup>2,3</sup> Xuxiao Zhang,<sup>4</sup> Noah J. Harris,<sup>1</sup> John T. Evans,<sup>1</sup> Jordan T.B. Stariha,<sup>1</sup> Udit Dalwadi,<sup>5</sup> Kaelin D. Fleming,<sup>1</sup> Harish Ranga-Prasad,<sup>1</sup> Calvin K. Yip,<sup>5</sup> Roger L. Williams,<sup>4</sup> Scott D. Hansen,<sup>2,3,\*</sup> and John E. Burke<sup>1,5,7,\*</sup>

<sup>1</sup>Department of Biochemistry and Microbiology, University of Victoria, Victoria, BC V8W 2Y2, Canada

<sup>2</sup>Department of Chemistry and Biochemistry, University of Oregon, Eugene, OR 97403, USA

<sup>3</sup>Institute of Molecular Biology, University of Oregon, Eugene, OR 97403, USA

<sup>4</sup>MRC Laboratory of Molecular Biology, Cambridge, UK

<sup>5</sup>Department of Biochemistry and Molecular Biology, The University of British Columbia, Vancouver, BC V6T 1Z3, Canada

<sup>6</sup>These authors contributed equally

<sup>7</sup>Lead contact

\*Correspondence: [shansen5@uoregon.edu](mailto:shansen5@uoregon.edu) (S.D.H.), [jeburke@uvic.ca](mailto:jeburke@uvic.ca) (J.E.B.)

<https://doi.org/10.1016/j.celrep.2023.112172>

## SUMMARY

Class IB phosphoinositide 3-kinase (PI3K $\gamma$ ) is activated in immune cells and can form two distinct complexes (p110 $\gamma$ -p84 and p110 $\gamma$ -p101), which are differentially activated by G protein-coupled receptors (GPCRs) and Ras. Using a combination of X-ray crystallography, hydrogen deuterium exchange mass spectrometry (HDX-MS), electron microscopy, molecular modeling, single-molecule imaging, and activity assays, we identify molecular differences between p110 $\gamma$ -p84 and p110 $\gamma$ -p101 that explain their differential membrane recruitment and activation by Ras and GPCRs. The p110 $\gamma$ -p84 complex is dynamic compared with p110 $\gamma$ -p101. While p110 $\gamma$ -p101 is robustly recruited by G $\beta\gamma$  subunits, p110 $\gamma$ -p84 is weakly recruited to membranes by G $\beta\gamma$  subunits alone and requires recruitment by Ras to allow for G $\beta\gamma$  activation. We mapped two distinct G $\beta\gamma$  interfaces on p101 and the p110 $\gamma$  helical domain, with differences in the C-terminal domain of p84 and p101 conferring sensitivity of p110 $\gamma$ -p101 to G $\beta\gamma$  activation. Overall, our work provides key insight into the molecular basis for how PI3K $\gamma$  complexes are activated.

## INTRODUCTION

The class IB phosphoinositide 3-kinase PI3K $\gamma$  is a lipid kinase that generates the lipid signaling molecule phosphatidylinositol 3,4,5 trisphosphate (PIP<sub>3</sub>) downstream of diverse cell surface receptors.<sup>2</sup> PI3K $\gamma$  can form two distinct complexes composed of a single catalytic subunit (p110 $\gamma$ , encoded by *PIK3CG*) binding to one of two regulatory subunits (p101 and p84, encoded by *PIK3R5* and *PIK3R6*, respectively).<sup>3–6</sup> PI3K $\gamma$  is highly expressed in immune cells and is a master regulator of the adaptive and innate immune systems,<sup>2</sup> with key roles in chemotaxis,<sup>7</sup> reactive oxide production,<sup>8</sup> and cytokine production.<sup>9</sup> It also plays important roles in endothelial cells, neurons, cardiomyocytes, and pulmonary cells.<sup>10</sup> Studies on catalytically dead PI3K $\gamma$  or the use of selective ATP-competitive inhibitors have defined important roles for PI3K $\gamma$  in the inflammatory response, and it shows promise as a therapeutic target for inflammatory disease including lupus,<sup>11</sup> arthritis,<sup>12</sup> atherosclerosis,<sup>13</sup> asthma,<sup>14</sup> and obesity-related changes in metabolism.<sup>15,16</sup> PI3K $\gamma$  inhibition has also shown promise for cancer treatment, with *PIK3CG* being frequently overexpressed in

numerous cancers,<sup>17,18</sup> and inhibiting PI3K $\gamma$  in the tumor micro-environment can promote anti-tumor immune responses.<sup>19,20</sup> This has led to PI3K $\gamma$  selective inhibitors being in phase II clinical trials to treat triple-negative breast cancer, renal cell carcinoma, and urothelial carcinoma.<sup>21</sup> However, the discovery of primary immunodeficiency patients harboring loss-of-function mutations in PI3K $\gamma$ <sup>22,23</sup> highlights potential challenges that may exist for long-term inhibition of PI3K $\gamma$  as a therapeutic approach.

The two complexes of PI3K $\gamma$  (p110 $\gamma$ -p101 and p110 $\gamma$ -p84) play distinct roles in cell signaling, with these putatively mediated by their differential ability to be activated by stimuli, including G protein-coupled receptors (GPCRs),<sup>24</sup> the immunoglobulin E (IgE)/antigen receptor,<sup>8</sup> receptor tyrosine kinases,<sup>25</sup> and Toll-like receptors (TLRs).<sup>26</sup> Experiments examining immune cells with selective knockout of the p101 or p84 regulatory subunits show that p101 is required for PI3K $\gamma$ 's role in chemotaxis, while the p84 subunit is required for reactive oxide generation,<sup>27–29</sup> with knockout of both regulatory subunits leading to complete loss of PI3K $\gamma$  activity.<sup>28</sup> Biochemical reconstitution studies have defined two major signaling proteins that mediate PI3K $\gamma$  activation downstream of cell surface receptors, lipidated G $\beta\gamma$

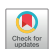

subunits released by activated GPCRs, and GTP-loaded lipidated Ras. The presence of p101 and p84 regulatory subunits dramatically alter the activation by each of these stimuli, with, *in vitro*, the p110 $\gamma$ -p101 complex activated  $\sim$ 100 fold by G $\beta\gamma$ , while p110 $\gamma$ -p84 is activated  $\sim$ 5-fold.<sup>30–34</sup> In cells, the p110 $\gamma$ -p84 complex is poorly recruited to cell membranes by G $\beta\gamma$  subunits, with it requiring Ras for membrane localization.<sup>34</sup> The p101 subunit forms an obligate heterodimer with p110 $\gamma$ , while p84 forms a weaker transient interaction with p110 $\gamma$ ,<sup>33</sup> but the molecular basis for this is currently not understood.

Extensive biophysical experiments on the free p110 $\gamma$  catalytic subunit and the p110 $\gamma$ -p101 complex have revealed insight into the architecture and regulation of p110 $\gamma$ .<sup>30,32,35–37</sup> The p110 $\gamma$  catalytic subunit is composed of an adaptor-binding subunit (ABD), a Ras-binding domain (RBD) that mediates activation downstream of Ras, a C2 domain, a helical domain, and a bilobal kinase domain. The cryoelectron microscopy (cryo-EM) structure of the p110 $\gamma$ -p101 complex revealed that p110 $\gamma$  binds to the p101 regulatory subunit through the C2 domain and the RBD-C2 and C2-helical linkers.<sup>32</sup> We previously mapped a putative G $\beta\gamma$  binding interface in the helical domain of p110 $\gamma$ ,<sup>30</sup> with an additional binding site in the C-terminal domain of p101.<sup>30,32</sup> Mutations in G $\beta\gamma$  have differential effects on either p110 $\gamma$  or p110 $\gamma$ -p101 activation,<sup>38</sup> but the full molecular details of how G $\beta\gamma$  binds to either p110 $\gamma$  or p101 are still unclear.

To decipher the molecular mechanism for why p101 and p84 subunits differentially regulate p110 $\gamma$  activation, we determined the structure of the p110 $\gamma$ -p84 complex using a combined X-ray crystallography, EM, and computational modeling approach. Hydrogen deuterium exchange mass spectrometry (HDX-MS) experiments revealed that the p110 $\gamma$ -p84 is dynamic relative to the p110 $\gamma$ -p101 complex. Membrane reconstitution experiments using HDX-MS and single-molecule total internal reflection fluorescence (TIRF) microscopy to study membrane recruitment of p110 $\gamma$ -p84 and p110 $\gamma$ -p101 by lipidated G $\beta\gamma$  and Ras shows that p110 $\gamma$ -p84 requires Ras for membrane localization. The p110 $\gamma$ -p84 complex can only be potently activated and membrane recruited by G $\beta\gamma$  when Ras is present, where the p110 $\gamma$ -p101 complex can be robustly activated by G $\beta\gamma$  subunits alone. Finally, computational modeling, HDX-MS, and mutagenesis were used to define the G $\beta\gamma$  binding interfaces with both the C-terminal domain of p101 and the helical domain of p110 $\gamma$ . Overall, this work provides insight into the molecular mechanisms mediating differential PI3K $\gamma$  activation by Ras and GPCR signaling.

## RESULTS

### Structure of the p110 $\gamma$ -p84 complex

To understand differences in the regulation of p110 $\gamma$ -p84 versus p110 $\gamma$ -p101 required molecular details of the p110 $\gamma$ -p84 complex. We purified full-length human p110 $\gamma$  in complex with either mouse p84 or porcine p101, with gel filtration profiles consistent with the formation of heterodimers. The domain architectures of p110 $\gamma$ , p84, and p101 are shown in Figure 1A, with SDS-PAGE gels of all proteins and protein complexes purified in this article shown in the source data. To determine the structure of the p110 $\gamma$ -p84 complex, we utilized a combination of X-ray crystal-

lography, EM, and AlphaFold2 computational modeling. Initial negative-stain EM data revealed that purified p110 $\gamma$ -p84 was homogeneous and formed a similar-shaped complex to our recently determined p110 $\gamma$ -p101 cryo-EM complex. However, even with extensive optimization, we could not generate high-quality vitrified specimens for cryo-EM, as the p110 $\gamma$ -p84 complex always dissociated into free p110 $\gamma$  and p84 particles. Extensive screening of precipitant conditions allowed us to obtain crystals of p110 $\gamma$ -p84 that diffracted to  $\sim$ 8.5 Å, with initial attempts to phase this using molecular replacement with the p110 $\gamma$ -p101 cryo-EM structure being unsuccessful. To provide additional molecular details on this complex, we utilized an AlphaFold2<sup>39</sup> model specifically trained for multimeric complexes.<sup>40</sup> Extensive computational modeling of different sequences of p110 $\gamma$  and p84 resulted in a consensus solution for the interface of p110 $\gamma$  with p84. These models had low predicted alignment error (PAE) between the p110 $\gamma$  and p84 subunits, which is a measure of the confidence of protein-protein interfaces (Figure S1). This model was then used as a search model for the low-resolution X-ray diffraction data, with only rigid body refinement resulting in a solution with high confidence ( $R_{\text{work}} = 0.28$ ,  $R_{\text{free}} = 0.34$ ; Table S1), despite the low resolution of the X-ray diffraction (Figures 1C and S2). While the positioning of side chains is impossible at this resolution, analysis of the 2mfo-Dfc density revealed the orientation of the helices in p84 at the p110 $\gamma$  interface, validating the inter-subunit orientation (Figure S2B), with this solution fitting well in the low-resolution negative-stain EM density (Figure S2A).

The overall architecture of the p84 subunit is conserved compared with p101, with it containing an N-terminal helical domain, a central  $\alpha/\beta$  barrel domain, and a C-terminal  $\beta$ -sandwich domain. The orientation of the regulatory subunit in the p110 $\gamma$ -p84 complex versus the p110 $\gamma$ -p101 complex<sup>32</sup> was strikingly similar (Figures 1C and 1D), with p84 binding to the C2 domain and the RBD-C2 and C2-helical linkers of p110 $\gamma$ . The primary interface for p110 $\gamma$  in p84 was located at the N-terminal helical region of p84, with additional interactions involving the C-terminal domain and the C terminus. One of the primary differences between p101 and p84 regulatory subunits is their differential ability to be recruited by lipidated G $\beta\gamma$  subunits. We have previously identified that this binding occurs at the C-terminal domain of p101 in a region we defined as the G $\beta\gamma$  binding domain (GBD).<sup>30,32</sup> The AlphaFold2 model of the p110 $\gamma$ -p84 structure allowed us to examine differences in this domain. The C-terminal domain of p84 contains the same  $\beta$ -sandwich fold; however, there are distinct differences compared with p101 at the face of this domain distal from p110 $\gamma$ . This can be clearly highlighted by visualizing the electrostatics of the GBD between p101 and p84, showing a strikingly different interfacial surface for G $\beta\gamma$  binding (Figures 1E and 1F). One of the primary differences that was immediately apparent was the presence of a helical extension in the loop between the  $\beta$ 8- $\beta$ 9 strands of the C-terminal domain of p101 that is part of the G $\beta\gamma$  binding face,<sup>30,32</sup> which is not present in p84.

### Differences in the interface of p84 with p110 $\gamma$ compared with p101

Previous *in vitro* assays testing subunit exchange of p110 $\gamma$ -p101 and p110 $\gamma$ -p84 complexes suggest that the p101 complex

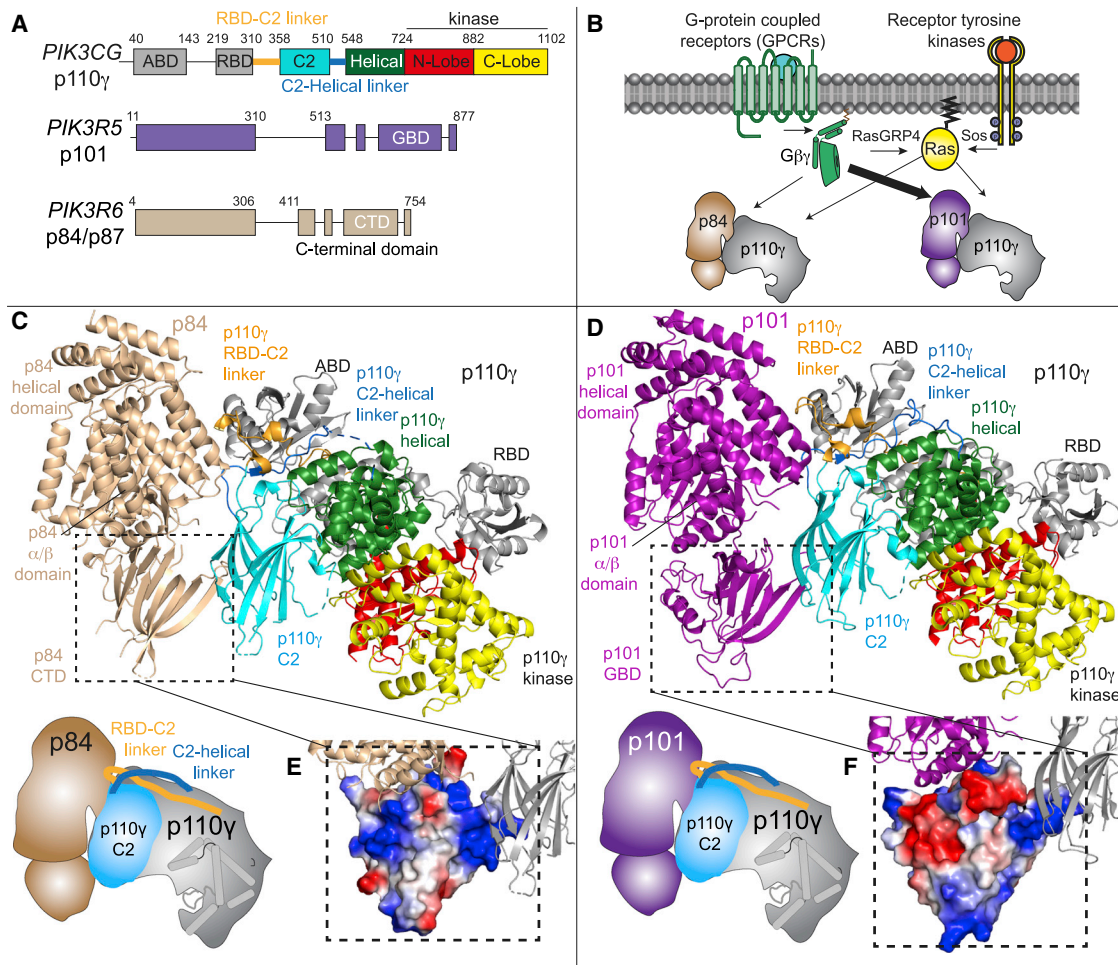

**Figure 1. The structure of the p110 $\gamma$ -p84 complex and comparison with p110 $\gamma$ -p101**

(A) Cartoon schematic of the PI3K $\gamma$  catalytic (p110 $\gamma$ ) and regulatory subunits (p101 and p84) with domain boundaries indicated.

(B) Cartoon of differences in activation between p110 $\gamma$ -p84 and p110 $\gamma$ -p101 complexes downstream of GPCRs and RTKs.

(C) Structure of the p110 $\gamma$ -p84 complex based on X-ray crystallography, negative-stain EM, and AlphaFold modeling (PDB: 8AJ8, supporting data in [Figures S1 and S2](#)). Domains are indicated from (A), with a cartoon schematic shown in the bottom left.

(D) Structure of the p110 $\gamma$ -p101 complex (PDB: 7MEZ).<sup>32</sup> Domains are indicated from (A), with a cartoon schematic shown in the bottom left.

(E and F) Differences in the C-terminal domain of p84 (E) and p101 (F) are shown with this domain shown as an electrostatic surface.

forms a constitutive complex with p110 $\gamma$ , with the p84 complex forming a weaker dynamic interaction with p110 $\gamma$ .<sup>33</sup> To explore the dynamics of the two complexes, we used HDX-MS, which measures dynamic differences in protein secondary structure. These experiments were carried out with human p110 $\gamma$  bound to porcine p101 and human p110 $\gamma$  bound to mouse p84. We compared the HDX rates in p110 $\gamma$  between the two complexes at four different time points (3, 30, 300, and 3,000 s). The full details of HDX-MS data processing are in [Table S2](#), with all raw HDX-MS data for all time points available in the source data. We observed statistically significant decreased exchange (defined as differences at any time point >5%, >0.4 Da, and a p value less than 0.01) in the p110 $\gamma$ -p101 complex versus the p110 $\gamma$ -p84 complex in the helical domain, C2 domain, the RBD-C2 linker, and the C2-helical linker ([Figures 2A and 2B](#)). These changes were all localized to either the interface with reg-

ulatory subunits or the helical domain adjacent to the interface, which is consistent with p101 forming a more stable complex with p110 $\gamma$  compared with p84.

These differences in exchange could possibly arise from differential dynamics of the intact complexes, an increased propensity for the p110 $\gamma$ -p84 complex to fall apart compared with p110 $\gamma$ -p101, or some combination of both. To further explore this point, we carried out HDX-MS experiments with varying concentrations of p110 $\gamma$ -p84 or p110 $\gamma$ -p101. In addition, for these experiments, we purified p110 $\gamma$  bound to either the human p84 or p101 regulatory subunits to validate that the changes observed were not due to minor differences in evolutionary conservation between mouse, pig, and human sequences ([Figure S3](#)). HDX-MS experiments were carried out at two time points (30 and 300 s) with a final concentration of 1,500 nM in high-concentration experiments and 175 nM in low-concentration experiments for



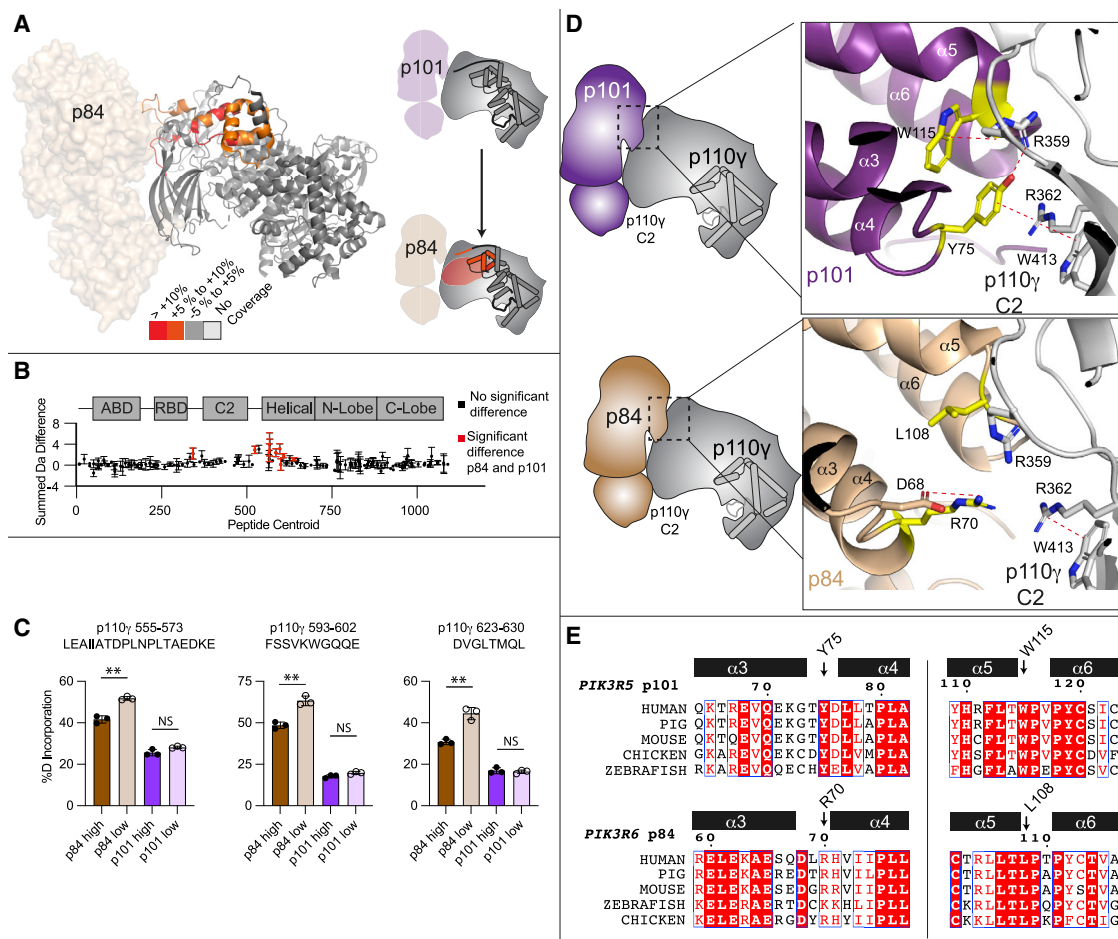

**Figure 2. Differences in the p110 $\gamma$  interface in p84 versus p101**

(A) HDX-MS differences in the p110 $\gamma$  subunit between the p110 $\gamma$ -p101 and p110 $\gamma$ -p84 complexes. Significant differences in deuterium exchange (defined as greater than 5%, 0.4 Da, and a two-tailed t test  $p < 0.01$  at any time point) are mapped on to the structure of p110 $\gamma$ -p84 and cartoon of p110 $\gamma$  according to the legend.

(B) Sum of the number of deuterium differences between the p110 $\gamma$ -p101 and p110 $\gamma$ -p84 complexes over the entire deuterium exchange time course. Positive difference is indicative of enhanced exchange in p110 $\gamma$ -p84. Each point is representative of the center residue of an individual peptide. Peptides that met the significance criteria described in (C) are colored red. Error is shown as the sum of the standard deviation across all time points ( $n = 3$  for each time point). All HDX-MS data are provided in the source data.

(C) Selected deuterium exchange at 30 s for peptides in p110 $\gamma$  for p110 $\gamma$ -p101 and p110 $\gamma$ -p84 complexes at either a high concentration (1,500 nM) or a low concentration (175 nM). Error is shown as standard deviation ( $n = 3$ ) with two-tailed  $p$  values as indicated: \*\* $p < 0.01$ ; not significant (ns)  $> 0.05$ . Full HDX-MS data for all peptides in this experiment are shown in the source data.

(D) Cartoon schematic of the p110 $\gamma$  interface for p101 (top) and p84 (bottom), with a zoom in on the residue's located at the p110 $\gamma$  interface for both p84 and p101. Dotted lines indicate cation-pi or electrostatic interactions.

(E) Sequence alignment of both p101 and p84 residues in the  $\alpha 3$  to  $\alpha 6$  helices located at the p110 $\gamma$  interface. The residues annotated in panel are indicated on the alignment. A full alignment of p101 and p84 is shown in [Figure S3](#).

both p110 $\gamma$ -p84 and p110 $\gamma$ -p101. Comparing p110 $\gamma$ -p84 with p110 $\gamma$ -p101 in the high-concentration experiment showed similar differences to what we observed with the mouse p84 or pig p101 complexes, showing that the difference between regulatory subunits is conserved for the human proteins (source data). For the p110 $\gamma$ -p101 complex, there was no significant difference in exchange between the high- and low-concentration samples, signifying that the complex remains intact in both conditions ([Figure 2C](#)). However, in the p110 $\gamma$ -p84 complex, there was significant increases in exchange at p84 interfacial regions in the low

concentration compared with the high concentration ([Figure 2C](#)). This is consistent with the p84 complex being more likely to fall apart compared with p110 $\gamma$ -p101 ([Figure 2D](#)).

To possibly understand the molecular basis for this difference in complex stability, we compared the structures of p110 $\gamma$ -p84 and p110 $\gamma$ -p101 at the regulatory subunit interfaces. Both p101 and p84 bind the same interface with p110 $\gamma$ . The most extensive binding interface for both p84 and p101 with p110 $\gamma$  is comprised of a set of N-terminal helices, specifically the loops between  $\alpha 3$ - $\alpha 4$  and  $\alpha 5$ - $\alpha 6$  ([Figure 2E](#)). In both p84 and p101, the interfacial

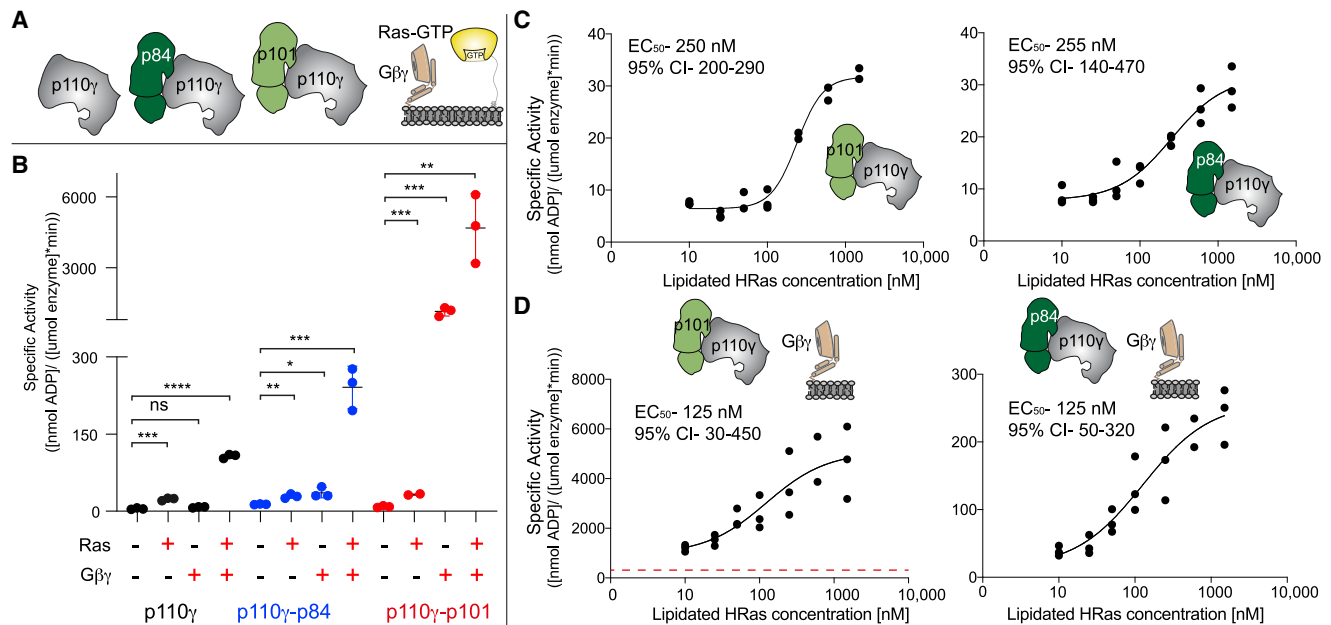

**Figure 3. Activation of p110 $\gamma$ -p84 and p110 $\gamma$ -p101 by lipidated HRas and G $\beta\gamma$**

(A) Cartoon schematic describing PI3K $\gamma$  variants tested and the lipidated activators, GTP $\gamma$ S-loaded HRas and G $\beta\gamma$ . (B) Lipid kinase activity assays of different p110 $\gamma$  complexes (concentration, 100–2,000 nM) with and without lipidated G $\beta\gamma$  (1.5  $\mu$ M) and lipidated HRas (1.5  $\mu$ M) using 5% phosphatidylinositol 4,5-bisphosphate (PIP<sub>2</sub>) vesicles mimicking the plasma membrane (20% phosphatidylserine, 50% phosphatidylethanolamine, 10% cholesterol, 10% phosphatidylcholine, 5% sphingomyelin). Error bars represent standard deviation (n = 3). Two-tailed p values represented by the symbols are as follows: \*\*\*\*p < 0.0001, \*\*\*p < 0.001; \*\*p < 0.01; \*p < 0.05; ns > 0.05. (C) Lipid kinase activity assays of p110 $\gamma$ -p84 and p110 $\gamma$ -p101 with varying concentrations of lipidated HRas (n = 3). (D) Lipid kinase activity assays of p110 $\gamma$ -p84 and p110 $\gamma$ -p101 in the presence of lipidated G $\beta\gamma$  (1.5  $\mu$ M) with varying concentrations of lipidated HRas (n = 3). Experiments in (C) and (D) were performed using the same vesicles as in (B). The dotted red line in the graph for the p110 $\gamma$ -p101 complex shows the peak activity for p110 $\gamma$ -p84 with both activators. The EC<sub>50</sub> and 95 confidence intervals (CIs) are indicated for both (C) and (D).

residues found in these helices are strongly evolutionarily conserved (Figure 2F); however, there are distinct differences between p101 and p84 subunits. The main difference is that in the p110 $\gamma$ -101 complex, there are a set of cation-pi interactions between charged residues in p110 $\gamma$  and aromatic residues in p101,<sup>32</sup> with these cation-pi interactions being lost in p84. Further mutational analysis will be required to define the molecular basis for the dynamic differences in stability between p84 and p101 complexes with p110 $\gamma$ .

#### Activation of the p110 $\gamma$ -p84/p110 $\gamma$ -p101 complexes by lipidated G $\beta\gamma$ and Ras

To provide additional insight into functional differences between p110 $\gamma$ -p84 and p110 $\gamma$ -p101, we characterized their lipid kinase activities as well as the activity of the free p110 $\gamma$  catalytic subunit using membrane reconstitution assays with lipidated G $\beta\gamma$ - and lipidated GTP $\gamma$ S-loaded G12V HRas (Figure 3A). We characterized the lipid kinase activities using saturating concentrations of lipidated G $\beta\gamma$  and lipidated HRas on membranes roughly mimicking the composition of the plasma membrane (5% PIP<sub>2</sub>, 20% phosphatidylserine, 50% phosphatidylethanolamine, 10% cholesterol, 10% phosphatidylcholine, and 5% sphingomyelin). The presence of HRas alone led to roughly similar 3-fold activation for p110 $\gamma$ , p110 $\gamma$ -p84, and p110 $\gamma$ -p101 (Figure 3B). The presence of G $\beta\gamma$  alone led to robust activation of p110 $\gamma$ -p101 (>100-fold

activation), with weak activation of p110 $\gamma$ -p84 (~3-fold), and no detectable activation of p110 $\gamma$  (Figure 3B). The additional presence of HRas for p110 $\gamma$ -p101 with G $\beta\gamma$  caused an approximately similar 3-fold Ras activation as was seen in the absence of G $\beta\gamma$ . However, for both free p110 $\gamma$  and p110 $\gamma$ -p84, there was synergistic activation when both HRas and G $\beta\gamma$  were present, which is not seen for p110 $\gamma$ -p101. This was consistent with previous observations of G $\beta\gamma$ - and HRas-mediated activation of PI3K $\gamma$  on other membrane systems.<sup>30–32,34</sup> Because the p110 $\gamma$ -p84 complex is more reliant on activation by Ras, we wanted to ensure that there was no major affinity difference toward HRas for p110 $\gamma$ -p84 and p110 $\gamma$ -p101. We carried out activation assays with varying levels of HRas both in the presence and absence of saturating lipidated G $\beta\gamma$  subunits. Both p110 $\gamma$ -p84 and p110 $\gamma$ -p101 in the presence and absence of G $\beta\gamma$  showed very similar EC<sub>50</sub> values (Figures 3C and 3D).

#### HDX-MS analysis of G $\beta\gamma$ and HRas activation of p110 $\gamma$ -p84

To define the molecular mechanism underlying the difference between p110 $\gamma$ -p84 and p110 $\gamma$ -p101 activation by lipidated G $\beta\gamma$  and HRas, we carried out HDX-MS experiments on membrane-reconstituted complexes. HDX experiments were measured at four time points (3, 30, 300, and 3,000 s) and five conditions: p110 $\gamma$ -p84 alone, p110 $\gamma$ -p84 with plasma membrane (PM) mimic

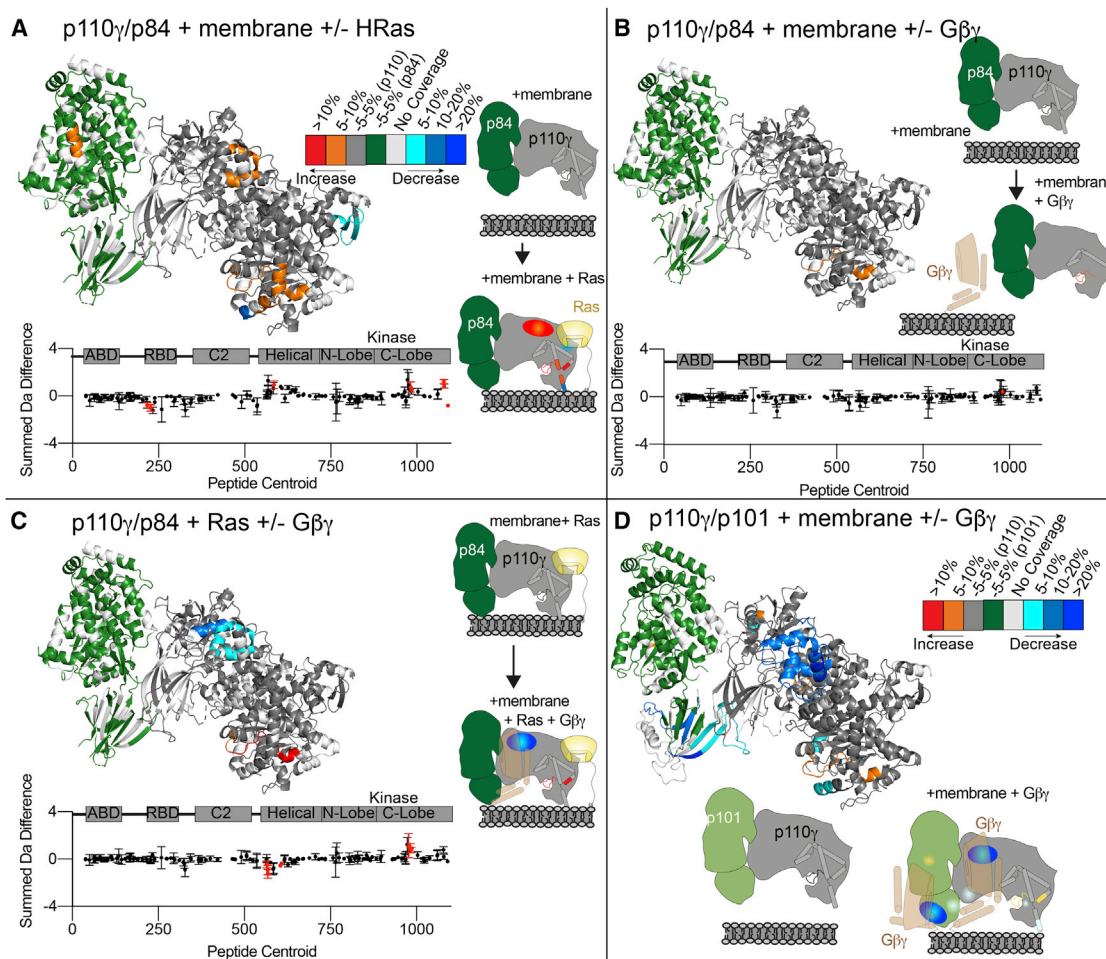

**Figure 4. HDX-MS analysis of p110 $\gamma$ -p84 activation by membrane-localized HRas and G $\beta\gamma$  and comparison with p110 $\gamma$ -p101**

(A–C) Significant HDX-MS differences in the p110 $\gamma$  and p84 subunits between (A) plasma membrane mimic vesicles and plasma membrane mimic vesicles with 3  $\mu$ M GTP $\gamma$ S-loaded lipidated HRas, (B) plasma membrane mimic vesicles and plasma membrane mimic vesicles with 3  $\mu$ M G $\beta\gamma$ , and (C) plasma membrane mimic vesicles with 3  $\mu$ M GTP $\gamma$ S-loaded lipidated HRas and plasma membrane mimic vesicles with both HRas and G $\beta\gamma$  (3  $\mu$ M) are mapped on the structure of p110 $\gamma$ -p84 according to the legend in (A). A cartoon model is shown to the right with differences annotated. The sum of the number of deuterium difference is shown for p110 $\gamma$ , with red dots representing peptides showing statistically significant differences. Error is shown as the sum of the standard deviations across all time points ( $n = 3$  for each time point).

(D) Significant HDX-MS differences in the p110 $\gamma$  and p101 subunits between plasma membrane mimic vesicles and plasma membrane mimic vesicles with G $\beta\gamma$  mapped on the structure of p110 $\gamma$ -p101 (PDB: 7MEZ) according to the legend. A cartoon model is shown to the right with differences annotated. The HDX-MS data in (D) are from our previous study<sup>30</sup> and are provided as a comparison with (B).

vesicles, p110 $\gamma$ -p84 with HRas on PM mimic vesicles, p110 $\gamma$ -p84 with G $\beta\gamma$  on PM mimic vesicles, and p110 $\gamma$ -p84 with G $\beta\gamma$  and HRas on PM mimic vesicles (Figures 4 and S4). The full details of HDX-MS data processing are in Table S2, with all raw HDX-MS data for all time points available in the source data.

There were no significant differences in HDX between free p110 $\gamma$ -p84 and p110 $\gamma$ -p84 in the presence of PM mimic vesicles without lipidated activators. This is consistent with the p110 $\gamma$ -p84 complex being primarily in solution in the absence of either HRas or G $\beta\gamma$ . When HRas was present on membrane surfaces, there were multiple regions that showed significant differences compared with membranes alone (Figures 4A and S4). This included increased exchange in the helical domain and multiple regions of the regulatory motif in

the kinase domain, as well as decreases in exchange in the  $\alpha$ 12 membrane-binding C-terminal helix and the HRas interface of the RBD. The changes in the helical and kinase domains are consistent with previously observed conformational changes that accompany membrane binding in p110 $\gamma$ .<sup>30,36,41</sup> Intriguingly, there were almost no significant changes in either p110 $\gamma$  or p84 between G $\beta\gamma$  membranes compared with membranes alone, with only one peptide in the kinase domain showing increased exchange (Figure 4B).

Consistent with the synergistic activation observed in the lipid kinase assays, there were significant differences in exchange observed for p110 $\gamma$ -p84 between HRas membranes and HRas/G $\beta\gamma$  membranes, including decreased exchange at the helical domain and increased exchange in the regulatory motif

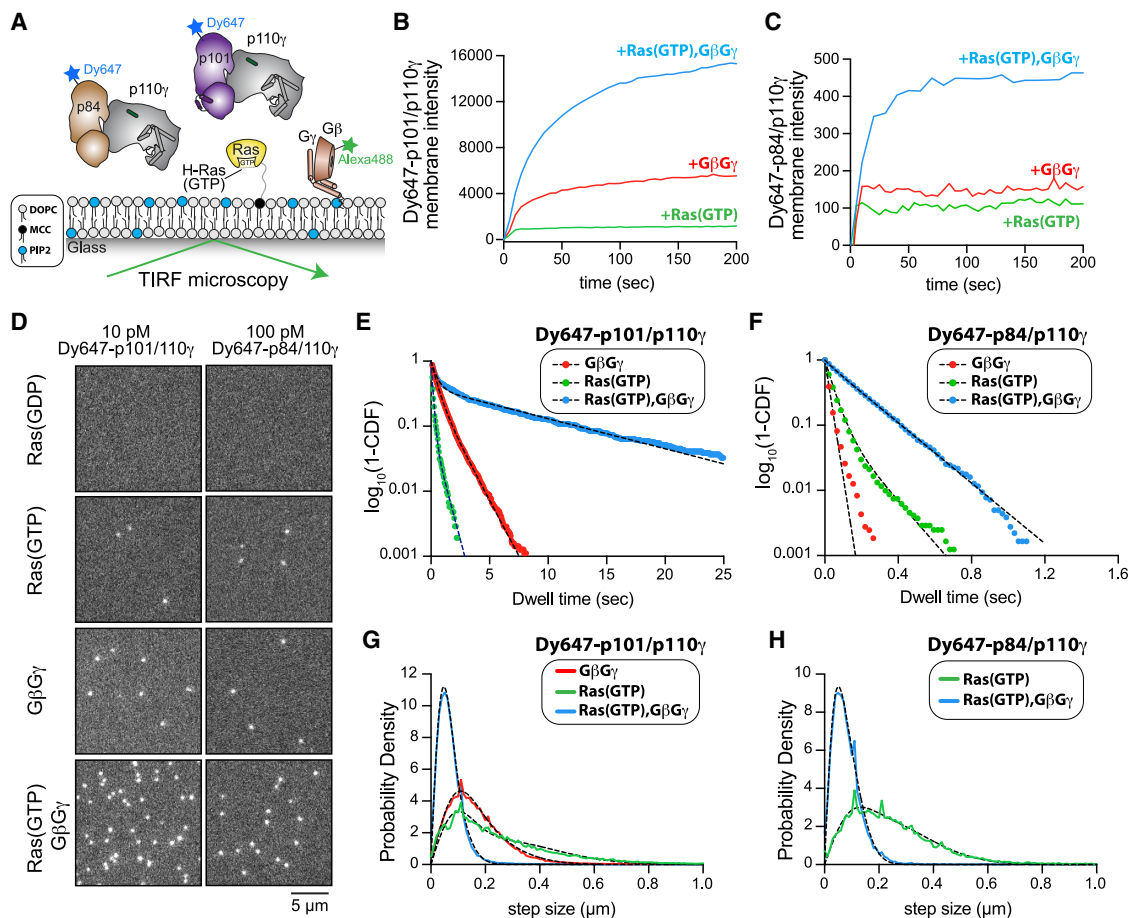

**Figure 5. p110 $\gamma$ -p84 and p110 $\gamma$ -p101 exhibit distinct membrane-binding dynamics in the presence of HRas and G $\beta$  $\gamma$**

(A) Experimental setup for visualizing DY647-p101-p110 $\gamma$  and DY647-p84-p110 $\gamma$  interactions with a supported lipid bilayer containing membrane-anchored HRas(GDP or GTP) and farnesylated G $\beta$  $\gamma$ . Experiments show a representative experiment, with all quantification generated from 2 to 4 technical replicates (see Table S3).

(B and C) Kinetics of PI3K complex membrane recruitment measured in the presence of 10 nM DY647-p101-p110 $\gamma$  or DY647-p84-p110 $\gamma$  using TIRF-M.

(D) Representative smTIRF-M images visualizing PI3K complex localization in the presence of 10 pM DY647-p101-p110 $\gamma$  or 100 pM DY647-p84-p110 $\gamma$ . Localization was measured on SLBs containing Ras(GDP), Ras(GTP), G $\beta$  $\gamma$ , or Ras(GTP)/G $\beta$  $\gamma$ .

(E and F) Single-molecule dwell time distributions for DY647-p101-p110 $\gamma$  or DY647-p84-p110 $\gamma$  measured in the presence of the indicated binding partners. Plots showing  $\log_{10}(1-\text{CDF})$  versus dwell time (s). Data are fit to either a single or double exponential decay curve (black dashed lines). Single-molecule imaging of DY647-p84-p110 $\gamma$  yielded the following mean dwell times: 39 (+RasGTP), 74 (+G $\beta$  $\gamma$ ), and 188 ms (+RasGTP/G $\beta$  $\gamma$ ). Single-molecule imaging of DY647-p101-p110 $\gamma$  yielded the following mean dwell times: 0.146 (+RasGTP), 0.73 (+G $\beta$  $\gamma$ ), and 3.09 s (+RasGTP/G $\beta$  $\gamma$ ).

(G and H) Step size (or displacement) distributions of DY647-p101-p110 $\gamma$  or DY647-p84-p110 $\gamma$ . PI3K complex formation with Ras(GTP), G $\beta$  $\gamma$ , or Ras(GTP)/G $\beta$  $\gamma$  modulates the single-molecule displacement (i.e., step size,  $\mu\text{m}$ ). Dashed black line represents the curve fit used to calculate the diffusion coefficient (see STAR Methods).

The membrane composition for membranes in (B)–(H) was 96% DOPC, 2% PI(4,5)P<sub>2</sub>, 2% MCC-PE. See Table S3 for time constants ( $\tau_1$  and  $\tau_2$ ), diffusion coefficients ( $\mu\text{m}^2/\text{s}$ ), and statistics ( $n = 2\text{--}4$ ).

of the kinase domain (Figure 4C). These changes in the helical domain were similar, although of a lesser magnitude than those we have observed when examining binding of p110 $\gamma$ -p101 to G $\beta$  $\gamma$  membranes (Figure 4D),<sup>30</sup> indicating that the binding site for G $\beta$  $\gamma$  on p110 $\gamma$  is conserved between the two complexes. There were no significant decreases in exchange in p84 with G $\beta$  $\gamma$  membranes (Figures 4C and S4), in contrast to the protection observed in the C-terminal domain of p101 (Figure 4D), which is consistent with p84 lacking a binding site for G $\beta$  $\gamma$  subunits.

### Single-molecule analysis of G $\beta$ $\gamma$ /Ras-mediated membrane recruitment of p110 $\gamma$ -p101/p110 $\gamma$ -p84

To compare how p110 $\gamma$ -p101 and p110 $\gamma$ -p84 associate with membrane-tethered HRas and G $\beta$  $\gamma$ , we performed single-molecule TIRF microscopy experiments on supported lipid bilayers (SLBs). Membranes containing cysteine-reactive maleimide lipids were used to covalently attach HRas in a biologically relevant orientation (Figures 5A and S5A–S5C). Farnesylated G $\beta$  $\gamma$  was then equilibrated into supported membranes to reach a surface density that facilitated membrane



binding of PI3K as previously demonstrated.<sup>32</sup> Using this assay, we compared the bulk membrane recruitment, single-molecule dwell times, and diffusion coefficients of fluorescently tagged PI3K complexes, DY647-p101-p110 $\gamma$  and DY647-p84-p110 $\gamma$ , in the absence and presence of HRas and/or G $\beta\gamma$ .

Visualization of the bulk membrane recruitment dynamics of fluorescently labeled PI3K complexes revealed that p101-p110 $\gamma$  interacts more strongly with HRas(GTP) and G $\beta\gamma$  compared with p84-p110 $\gamma$  (Figures 5B and 5C). In the presence of HRas(GTP), both DY647-p101-p110 $\gamma$  and DY647-p84-p110 $\gamma$  displayed rapid equilibration kinetics on supported membranes. In contrast, recruitment of DY647-p101-p110 $\gamma$  to membranes containing lipid-anchored G $\beta\gamma$  was more robust compared with DY647-p84-p110 $\gamma$  (Figures 5B–5C). The time required for DY647-p110 $\gamma$ -p101 to equilibrate with G $\beta\gamma$ -containing membranes was also longer, reflecting the ability of p101-p110 $\gamma$  to interact with two G $\beta\gamma$  molecules.<sup>32</sup> A synergistic enhancement in membrane binding was observed for both DY647-p101-p110 $\gamma$  and DY647-p84-p110 $\gamma$  in the combined presence of HRas(GTP) and G $\beta\gamma$ . However, the total membrane recruitment of DY647-p101-p110 $\gamma$  was  $\sim$ 30-fold higher compared with that of DY647-p84-p110 $\gamma$ .

We established conditions to directly visualize membrane association of PI3K complexes with single-molecule resolution (Figure 5D; Videos S1 and S2). In the presence of HRas(GDP), no detectable membrane-binding events were observed for either DY647-p101-p110 $\gamma$  or DY647-p84-p110 $\gamma$  (Figure 5D). Consistent with our bulk membrane recruitment measurements, the timescales of the single-molecule dwell times for DY647-p84-p110 $\gamma$  under all conditions were an order of magnitude shorter compared with DY647-p101-p110 $\gamma$  (Figures 5E, 5F, and S5K–S5M; Table S3). In addition, a 10-fold higher concentration of DY647-p84-p110 $\gamma$  was required to observe a similar number of single-molecule binding events compared with DY647-p101-p110 $\gamma$  (Figure 5D). To infer whether membrane-bound DY647-p101-p110 $\gamma$  simultaneously engages HRas(GTP) and G $\beta\gamma$ , we measured changes in the diffusion coefficients calculated from the step size distribution. In the presence of either HRas(GTP) or G $\beta\gamma$ , DY647-p101-p110 $\gamma$  displayed a range of diffusion coefficients between 0.08 and 0.64  $\mu\text{m}^2/\text{s}$  (Figures 5G, 5H, and S5H–S5J; Table S3). The median displacement (or step size) per frame decreased 3-fold when comparing DY647-p101-p110 $\gamma$  bound to membranes containing either HRas(GTP) or G $\beta\gamma$  (0.2 and 0.15  $\mu\text{m}/\text{frame}$ , respectively) with the combination of HRas(GTP)/G $\beta\gamma$  (0.06  $\mu\text{m}/\text{frame}$ ). A similar trend was observed for DY647-p84-p110 $\gamma$ ; however, the single-molecule trajectories measured in the presence of G $\beta\gamma$  were too transient to calculate a diffusion coefficient.

These data are consistent with both complexes being able to simultaneously engage Ras and G $\beta\gamma$ , with the p110 $\gamma$ -p101 complex able to bind to two G $\beta\gamma$  molecules and one Ras, and p110 $\gamma$ -p84 binding to one G $\beta\gamma$  molecule and one Ras. When each activator is presented alone, p110 $\gamma$ -p84 is more robustly recruited by Ras compared with G $\beta\gamma$ , and p110 $\gamma$ -p101 is more robustly recruited by G $\beta\gamma$  compared with Ras.

### Analysis of G $\beta\gamma$ binding to p110 $\gamma$ and p101

We previously characterized G $\beta\gamma$  binding to both the p101 and p110 $\gamma$  subunits using HDX-MS and identified mutations in either the helical domain of p110 $\gamma$  or the C-terminal domain of p101 that prevent G $\beta\gamma$  activation.<sup>30</sup> To provide additional insight into the molecular basis for how p110 $\gamma$  and p101 interact with G $\beta\gamma$  and why p84 lacks this ability, we carried out AlphaFold-multimer<sup>40</sup> modeling of both interfaces (Figures S6 and S7). The search models converged on a consensus orientation of G $\beta\gamma$  interaction with the p101 C-terminal domain (Figure S6) and a different consensus orientation of G $\beta\gamma$  interaction with the helical domain (Figure S7), both with predicted alignment scores and per-residue estimate of confidence (predicted local distance difference test [pLDDT]) scores<sup>39</sup> consistent with excellent model accuracy (Figures S6A, S6B, S7A, and S7B).

These models of G $\beta\gamma$  binding allowed us to make a schematic of how the p110 $\gamma$ -p101 complex associates with two G $\beta\gamma$  subunits (Figure 6A). Critically, the G $\gamma$  subunit of G $\beta\gamma$  is geranylated at its C terminus, and in our models, the G $\gamma$  C terminus is oriented in a direction pointed toward the membrane when p110 $\gamma$  is oriented toward its putative membrane interface. Examining these models compared with other G $\beta\gamma$  complexes showed that the same face of the G $\beta$  subunit that binds to the pleckstrin homology (PH) domain of GPCR kinase 2<sup>42</sup> binds to the C-terminal domain of p101 and the helical domain of p110 $\gamma$  (Figures 6B–6D). The p101 interface with G $\beta\gamma$  is primarily composed of two evolutionarily conserved helices positioned in a loop between  $\beta$ 8 and  $\beta$ 9 of the C-terminal domain (Figure 6E), along with an extensive interface at residues 816–830. The loop between  $\beta$ 8 and  $\beta$ 9 is not conserved in p84 (Figure 6E). In the helical domain, the interface is entirely composed of the N-terminal helix (annotated as  $\alpha$ 1, 548–560). These sites are also where we previously designed complex disrupting mutations for both p101 (DQDE817AAA and RKIL821AAA) and p110 $\gamma$  (RK552DD),<sup>30</sup> providing further validation of the putative interface.

There are differences in the orientation and residues mediating G $\beta\gamma$  binding between the p101 and p110 $\gamma$  sites (Figures 6B and 6C). The p101 site forms a more extensive interface with G $\beta\gamma$ , with multiple G $\beta\gamma$  contact sites that are unique compared with the helical domain. These differences in interaction are consistent with unique mutations in G $\beta\gamma$  having differential effects between p110 $\gamma$  and p110 $\gamma$ -p101 activation.<sup>38</sup> Examining the structures of the C-terminal domains showed differences between p101 and p84 at the site where p101 binds G $\beta\gamma$ . Overall, the C-terminal domains are mainly structurally conserved, but the two helices at the interface with G $\beta\gamma$  in p101 between  $\beta$ 8 and  $\beta$ 9 are absent in p84 (Figure 6F). We generated a loop swap mutation where we cloned the p84  $\beta$ 8- $\beta$ 9 loop into p101 and measured the lipid kinase activity of p110 $\gamma$ -p84, p110 $\gamma$ -p101, and the p110 $\gamma$ -p101  $\beta$ 8- $\beta$ 9 loop swap mutant in the presence and absence of a low concentration of G $\beta\gamma$  (100 nM). This concentration of G $\beta\gamma$  was used as p110 $\gamma$ -p84 is 10-fold less sensitive to G $\beta\gamma$  compared with p110 $\gamma$ -p101,<sup>34</sup> with 100 nM G $\beta\gamma$  able to robustly activate p110 $\gamma$ -p101 while only minimally activating p110 $\gamma$ -p84. Under these conditions, we observed robust activation of p110 $\gamma$ -p101 by G $\beta\gamma$ , with minimal G $\beta\gamma$  activation for both p110 $\gamma$ -p84 and the p110 $\gamma$ -p101  $\beta$ 8- $\beta$ 9 loop swap mutant (Figure 6G). Critically p110 $\gamma$ -p84 and the



p110 $\gamma$ -p101  $\beta$ 8- $\beta$ 9 loop swap mutant had equivalent activation, clearly identifying the  $\beta$ 8- $\beta$ 9 loop as a critical feature in p101 that confers sensitivity to G $\beta\gamma$  activation. This reveals the structural basis for the absence of G $\beta\gamma$  binding in p84 and provides a molecular underpinning for p110 $\gamma$ -p101 sensitivity toward GPCR activation. Overall, this model is consistent with our previous biochemical and TIRF microscopy data supporting the engagement of two G $\beta\gamma$  molecules by the p110 $\gamma$ -p101 complex.<sup>32</sup>

## DISCUSSION

The class IB PI3K $\gamma$  is a key regulator of the immune system<sup>2,10,43</sup> and is a therapeutic target for multiple human diseases including cancer and inflammatory diseases.<sup>12,19,20</sup> Selective p110 $\gamma$  inhibitors are currently in phase II clinical trials, so fully understanding the regulation of PI3K $\gamma$  is essential for continued therapeutic development. The activity of p110 $\gamma$  is fundamentally regulated by its association with regulatory subunits, p84 or p101, as neutrophils lacking both regulatory subunits have similar PIP<sub>3</sub> responses to a p110 $\gamma$  kinase-dead knockin mutant.<sup>28</sup> Here, we report clear molecular insight into how Ras and GPCRs differentially regulate the p110 $\gamma$ -p84 and p110 $\gamma$ -p101 complexes.

The structure of p110 $\gamma$ -p84 reveals that the p84 subunit shares a similar architecture to the p101 subunit.<sup>32</sup> *In vivo*, the p101 and p84 regulatory subunits are expressed in a tissue-specific manner alongside p110 $\gamma$ . Biochemical evidence suggests that the p110 $\gamma$ -p84 complex is more dynamic compared with p110 $\gamma$ -p101, with p101 capable of replacing the p84 subunit, but not vice versa.<sup>33</sup> While the overall secondary structure at the interface with p110 $\gamma$  is conserved, there are also numerous evolutionarily conserved differences between p101 and p84 in amino acids at the p110 $\gamma$  interface. We identified two specific cation- $\pi$  interactions in p110 $\gamma$ -p101 that are absent in p110 $\gamma$ -p84. Although further mutational analysis is required, we hypothesize that these interactions are responsible for the strong association between p101 and p110 $\gamma$  compared with p84.

The dynamic nature of p110 $\gamma$ -p84 has important implications for PI3K $\gamma$  signaling and inhibition, as this suggests that any stimuli that may depend on binding or modulating free p110 $\gamma$  will only occur in p110 $\gamma$ -p84. An antibody that bound the p84/p101 interface on the C2 domain of p110 $\gamma$  selectively inhibited only p110 $\gamma$ -p84 and not p110 $\gamma$ -p101. This is likely mediated by p110 $\gamma$ -p84 dissociating and the antibody sterically preventing regulatory subunit binding, with the antibody binding surface being inaccessible in p110 $\gamma$ -p101.<sup>44</sup> The p110 $\gamma$  subunit can be activated by protein kinase C phosphorylation of the helical domain downstream of the IgE antigen receptor in mast cells, with this putatively only occurring for p110 $\gamma$ -p84 and not p110 $\gamma$ -p101.<sup>45</sup> This phosphorylation site is in a location that may be inaccessible to p110 $\gamma$  when bound to either p101 or p84; this may provide a unique mechanism for why only p110 $\gamma$ -p84 complexes can be activated by protein kinase C (PKC). Further biochemical and structural studies will be required to examine if dynamic differences in p110 $\gamma$ -p84 and p110 $\gamma$ -p101 control regulation by post-translational modifications. Biochemical assays of HRas activation showed that in the absence of G $\beta\gamma$ , both p110 $\gamma$ -p101 and p110 $\gamma$ -p84 are simi-

larly weakly activated by saturating HRas, consistent with previous observations.<sup>30,31,33,34</sup> Dose-response experiments clearly showed that the affinity for HRas activation was equivalent between the two complexes, which is consistent with the Ras interface being distant from the p101-p84 interface.<sup>37</sup>

HDX-MS and single-molecule TIRF microscopy (smTIRF-M) experiments showed the membrane anchored HRas was able to recruit p110 $\gamma$ -p84 to the membrane; however, this interaction was not sufficient to fully activate kinase activity. This suggests that HRas by itself acts as a critical regulator of the membrane binding but that both PI3K $\gamma$  complexes require G $\beta\gamma$  for robust activation. In p110 $\gamma$ -p84, the presence of HRas led to large synergistic activation by G $\beta\gamma$ . This was supported by HDX-MS and smTIRF-M experiments showing limited G $\beta\gamma$ -mediated membrane recruitment of p110 $\gamma$ -p84. Clear differences in HDX-MS at the G $\beta\gamma$  interface of p110 $\gamma$ -p84 were only observed in the presence of both HRas and G $\beta\gamma$ . For p110 $\gamma$ -p84 with both HRas and G $\beta\gamma$  present at saturating concentrations, the kinase activity was still much lower than G $\beta\gamma$  activation of p110 $\gamma$ -p101. Based on the smTIRF-M experiments, the membrane avidity of p110 $\gamma$ -p101 under “saturating” conditions was an order of magnitude stronger compared with p110 $\gamma$ -p84. This is consistent with the G $\beta\gamma$  interfaces in both the helical domain of p110 $\gamma$  and the GBD of p101 being critical in orienting the p110 $\gamma$  catalytic subunit for maximal kinase activity. These biochemical and biophysical data provide a molecular underpinning for the observation in cells that Ras is required for p110 $\gamma$ -p84 activation<sup>34</sup> and for why full activation requires an intact G $\beta\gamma$  binding site in p110 $\gamma$ .<sup>28</sup> This also explains why in mast cells, which only express p84, inhibitors of Ras lipidation abrogate PI3K $\gamma$  signaling, while upon treatment in immune cells expressing p101, PI3K $\gamma$  signaling is maintained.<sup>46</sup>

The p110 $\gamma$  catalytic subunit being almost completely inactive in the absence of a regulatory subunit is unique among class I PI3K isoforms, as in the other class I PI3K isoforms (p110 $\alpha$ , p110 $\beta$ , p110 $\delta$ ), the catalytic subunit alone is highly active,<sup>47–49</sup> and the regulatory subunit acts to inhibit kinase activity and stabilize the catalytic subunit. The p110 $\gamma$  subunit is inhibited through the presence of an internal tryptophan lock in the regulatory motif of the kinase domain,<sup>36,41</sup> with this putatively opened when the p110 $\gamma$  subunit is properly oriented on a membrane surface.<sup>30</sup> The opening of this lock putatively reorients the C-terminal helix of the kinase domain, allowing it to interact with membrane surfaces and allowing the activation loop to bind to lipid substrate. The requirement of G $\beta\gamma$  for robust activation of p110 $\gamma$  possibly implies that it orients the catalytic subunit in a manner that disrupts this inhibitory interface. This is supported by cellular experiments that show constitutively membrane-localized p110 $\gamma$  is activated by GPCRs.<sup>50</sup> Additional computational and biophysical studies of p110 $\gamma$  bound to membrane in inactive and active conformations will be required to fully define the molecular basis for conformational changes required for the fully active state.

Modeling of G $\beta\gamma$  binding to both p101 and p110 $\gamma$  revealed insight into how G $\beta\gamma$  can activate PI3K $\gamma$  complexes. This p110 $\gamma$ -p101 can bind two G $\beta\gamma$  subunits, with p110 $\gamma$ -p84 able to bind only a single G $\beta\gamma$  subunit. These models agreed well with our previous HDX-MS and mutational analysis of p101



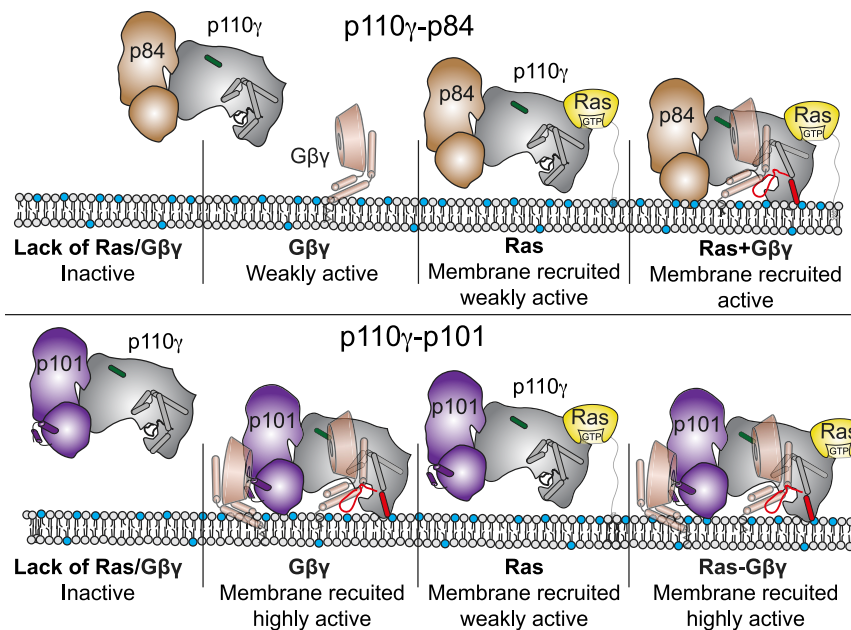

**Figure 7. Model of differential activation of PI3K $\gamma$  complexes by G $\beta\gamma$  and Ras**

Schematic of how Ras and G $\beta\gamma$  subunits can activate p110 $\gamma$ -p84 (top) and p110 $\gamma$ -p101 (bottom). Ras in the absence of G $\beta\gamma$  leads to membrane recruitment for both complexes but only weakly activates kinase activity. The G $\beta\gamma$  binding helices in the GBD of p101 and the helical domain interface with G $\beta\gamma$  are shown, with the helical domain h $\alpha$ 1 highlighted in green. The C-terminal helix in the kinase domain that reorients upon membrane binding is highlighted in red in the membrane-bound complex.

p110 $\gamma$ -p101 and p110 $\gamma$ -p84 are regulated could lead to inhibitors specific for either p110 $\gamma$ -p101 or p110 $\gamma$ -p84, which may maintain therapeutic benefit but with decreased side effects. This fits with our observation of nanobodies that block Ras activation strongly inhibit p110 $\gamma$ -p84 activation, while those blocking the p101 interface with G $\beta\gamma$  selectively target p110 $\gamma$ -p101.<sup>52</sup> Further

and p110 $\gamma$ <sup>30</sup> as well as smTIRF-M experiments examining membrane recruitment using varying G $\beta\gamma$  concentrations, which implied that the p110 $\gamma$ -p101 complex bound two G $\beta\gamma$  subunits.<sup>32</sup> By contrast, the p110 $\gamma$ -p84 complex can only bind one G $\beta\gamma$ , with robust membrane recruitment by G $\beta\gamma$  requiring Ras. The interface in p110 $\gamma$  is located in the N-terminal helix of the helical domain. HDX-MS experiments found that this same region mediates G $\beta\gamma$  binding in the class IA PI3K isoform p110 $\beta$ .<sup>51</sup> Like p110 $\gamma$ -p84, p110 $\beta$  requires additional activation and membrane recruitment by either RTKs or Rho GTPases to be robustly activated by G $\beta\gamma$  subunits, suggesting this is either a relatively weak interface or that binding is dependent on conformational changes induced by membrane binding. Intriguingly, in both p110 $\beta$  and p110 $\gamma$ , there is a conformational change in this helix upon membrane recruitment.<sup>30,51</sup> The interface in the C-terminal domain of p101 is primarily composed of two helices between  $\beta$ 8 and  $\beta$ 9, which is evolutionarily conserved in p101 and is not conserved in p84. This provides a molecular underpinning for why p84 shows greatly reduced sensitivity and activation by G $\beta\gamma$  subunits even in the presence of Ras. The G $\beta\gamma$  interface in p101 is more extensive than that found in p110 $\gamma$ , which may explain why G $\beta\gamma$  alone can so potently activate p110 $\gamma$ -p101 and does not require additional membrane-localized activators.

The development of therapeutics targeting PI3K $\gamma$  are clinically advanced, with ATP-competitive small-molecule inhibitors currently in phase II clinical trials in cancer<sup>21</sup> and in preclinical investigation in chronic obstructive pulmonary disease and inflammatory disease.<sup>14</sup> There are potential challenges for even highly selective p110 $\gamma$  inhibitors, as immune side effects may be difficult to avoid, highlighted by patients with inactivating primary immunodeficiency clinical p110 $\gamma$  mutations.<sup>22,23</sup> The molecular insight into the difference in how

medicinal chemistry efforts may reveal opportunities to target these sites by small-molecule inhibitors.

Our detailed biochemical, biophysical, and structural analysis of p110 $\gamma$ -p84 and p110 $\gamma$ -p101 provides insight into how PI3K $\gamma$  complexes are assembled and activated by membrane-localized Ras and G $\beta\gamma$ . Our work has defined the molecular basis for how these two distinct complexes can differentially integrate upstream signals, similarly to how different regulatory subunits can alter the activation of mTOR complexes.<sup>53</sup> A summary of the molecular differences between the p110 $\gamma$ -p84 and p110 $\gamma$ -p101 and their activation by Ras and G $\beta\gamma$  are shown in Figure 7. This work provides a framework for the design of allosteric modulators for both p110 $\gamma$ -p84 and p110 $\gamma$ -p101, which may inform PI3K $\gamma$  complex-specific therapeutic development in inflammatory diseases and cancer.

#### Limitations of the study

The molecular insight we present here concerning the association of p84 with p110 $\gamma$  and how both p110 $\gamma$  and p101 interact with G $\beta\gamma$  subunits relies on an extensive set of medium- to low-resolution data supported by AlphaFold modeling and mutagenesis analysis. Continued structural investigations of the G $\beta\gamma$  binding site on both p101 and p110 $\gamma$  will be required to unambiguously define these interfaces beyond what is possible with modeling, HDX-MS, and mutagenesis analysis. Currently, our HDX-MS data have limited resolution in that they simultaneously detect all protein conformational changes induced by G $\beta\gamma$  binding. To gain new insight about transitions between PI3K $\gamma$  conformations, molecular dynamic simulations could be performed on G $\beta\gamma$ -containing membranes. Solving higher-resolution cryo-EM structures of PI3K $\gamma$  complexes docked on membranes in the absence and presence of Ras and G $\beta\gamma$  could also help define the ensemble of PI3K $\gamma$  conformations and membrane orientations. In the case of the p110 $\gamma$ -p84 complex, our structural



analysis was challenging due to the transient nature of this complex compared with p110 $\gamma$ -p101. It remains to be seen whether unidentified p84 specific binders or activators (post-translational modifications [PTMs], etc.) can strengthen the association between p110 $\gamma$ -p84. Understanding these mechanisms could facilitate solving higher-resolution structures of p110 $\gamma$ -p84 in complex with Ras and G $\beta\gamma$ .

Using smTIRF-M, we observed changes in PI3K $\gamma$  membrane-binding behavior that were consistent with distinct higher-order complexes forming between G $\beta\gamma$  and Ras. Our current study, however, lacks the computational tools and resolution needed to quantify the probability distribution and transition rates between membrane-tethered PI3K $\gamma$  complexes that are in dynamic equilibrium. In the future, single-molecule fluorescence resonance energy transfer (FRET) measurements could help quantify intramolecular conformational dynamics of membrane-tethered PI3K $\gamma$  and quantify the dynamics of interactions with Ras and G $\beta\gamma$ . Future single-molecule studies could also help decipher how allosteric regulation versus membrane orientation control PI3K $\gamma$  activity. This would help explain why there is such a large increase in kinase activity for the p110 $\gamma$ -p101 complex upon binding G $\beta\gamma$  and Ras beyond what can be explained simply by membrane association. Continued investigations on membranes that more closely mimic native biological membrane will also be necessary to understand the full biophysical details of PI3K $\gamma$  activation.

## STAR★METHODS

Detailed methods are provided in the online version of this paper and include the following:

- **KEY RESOURCES TABLE**
- **RESOURCE AVAILABILITY**
  - Lead contact
  - Materials availability
  - Data and code availability
- **EXPERIMENTAL MODEL AND SUBJECT DETAILS**
- **METHOD DETAILS**
  - Plasmid generation
  - Virus generation and amplification
  - Expression and purification of PI3K $\gamma$  constructs
  - Expression and purification of lipidated G $\beta\gamma$  for kinase activity assays
  - Expression and purification of lipidated HRas G12V for ATPase and HDX-MS experiments
  - Expression and purification of complex of porcine p110 $\gamma$  with mouse p84 (X-Ray crystallography)
  - Purification of complex of porcine p110 $\gamma$  with mouse p84 (X-Ray crystallography)
  - Purification of proteins for TIRF microscopy
  - Hydrogen deuterium eXchange mass spectrometry-human regulators
- **QUANTIFICATION AND STATISTICAL ANALYSIS**
  - Single particle tracking
  - Single species model
  - Two species model
  - Single exponential model

- Two exponential model
- Mass analysis of peptide centroids and measurement of deuterium incorporation for HDX-MS experiments

## SUPPLEMENTAL INFORMATION

Supplemental information can be found online at <https://doi.org/10.1016/j.celrep.2023.112172>.

## ACKNOWLEDGMENTS

We thank Alex Berndt and ESRF ID29 beamline scientist Christoph Müller-Dieckmann for assistance with X-ray diffraction data collection. J.E.B. is supported by an operating grant from the Canadian Institutes of Health Research (CIHR, 168998), with salary support from the Michael Smith Foundation for Health Research Scholar award (MSFHR-17686). S.D.H. was supported by an NSF CAREER Award (MCB-2048060). B.R.D. was supported by the Molecular Biology and Biophysics Training Program (NIH T32 GM007759). C.K.Y. is supported by CIHR (FDN-143228) and the Natural Sciences and Engineering Research Council of Canada (RGPIN-2018-03951). R.L.W. is supported by the Medical Research Council (MC\_U105184308) and Cancer Research UK (grant DRCPGM\100014). X.Z. was supported by an MRC-LMB Cambridge Scholarship and by the Cambridge Overseas Trust.

## AUTHOR CONTRIBUTIONS

Conceptualization, M.K.R., S.D.H., and J.E.B.; validation, N.J.H.; formal analysis, M.K.R., M.L.J., N.J.H., X.Z., S.D.H., and J.E.B.; investigation, M.K.R., B.R.D., M.L.J., X.Z., N.J.H., U.D., J.T.E., J.T.B.S., and K.D.F.; writing – original draft, M.L.J., S.D.H., and J.E.B.; writing – review & editing, M.K.R., M.L.J., R.L.W., C.K.Y., S.D.H., and J.E.B.; supervision, R.L.W., C.K.Y., S.D.H., and J.E.B.; project administration, S.D.H. and J.E.B.; funding acquisition, R.L.W., S.D.H., and J.E.B.

## DECLARATION OF INTERESTS

J.E.B. reports personal fees from Scorpion Therapeutics and Olema Oncology and research grants from Novartis.

Received: July 29, 2022

Revised: December 21, 2022

Accepted: February 13, 2023

Published: February 26, 2023

## REFERENCES

1. Perez-Riverol, Y., Bai, J., Bandla, C., García-Seisdedos, D., Hewapathirana, S., Kamatchinathan, S., Kundu, D.J., Prakash, A., Frericks-Zipper, A., Eisenacher, M., et al. (2022). The PRIDE database resources in 2022: a hub for mass spectrometry-based proteomics evidences. *Nucleic Acids Res.* 50, D543–D552. <https://doi.org/10.1093/nar/gkab1038>.
2. Lanahan, S.M., Wymann, M.P., and Lucas, C.L. (2022). The role of PI3K $\gamma$  in the immune system: new insights and translational implications. *Nat. Rev. Immunol.* 22, 687–700. <https://doi.org/10.1038/s41577-022-00701-8>.
3. Stephens, L.R., Eguinoa, A., Erdjument-Bromage, H., Lui, M., Cooke, F., Coadwell, J., Smrcka, A.S., Thelen, M., Cadwallader, K., Tempst, P., and Hawkins, P.T. (1997). The G beta gamma sensitivity of a PI3K is dependent upon a tightly associated adaptor, p101. *Cell* 89, 105–114. [https://doi.org/10.1016/s0092-8674\(00\)80187-7](https://doi.org/10.1016/s0092-8674(00)80187-7).
4. Suire, S., Coadwell, J., Ferguson, G.J., Davidson, K., Hawkins, P., and Stephens, L. (2005). p84, a new Gbetagamma-activated regulatory subunit of the type IB phosphoinositide 3-kinase p110gamma. *Curr. Biol.* 15, 566–570. <https://doi.org/10.1016/j.cub.2005.02.020>.
5. Voigt, P., Dörner, M.B., and Schaefer, M. (2006). Characterization of p87PIKAP, a novel regulatory subunit of phosphoinositide 3-kinase  $\gamma$

- that is highly expressed in heart and interacts with PDE3B. *J. Biol. Chem.* 281, 9977–9986. <https://doi.org/10.1074/jbc.M512502200>.
6. Rathinaswamy, M.K., and Burke, J.E. (2020). Class I phosphoinositide 3-kinase (PI3K) regulatory subunits and their roles in signaling and disease. *Adv. Biol. Regul.* 75, 100657. <https://doi.org/10.1016/j.jbior.2019.100657>.
  7. Li, Z., Jiang, H., Xie, W., Zhang, Z., Smrcka, A.V., and Wu, D. (2000). Roles of PLC-beta2 and -beta3 and PI3Kgamma in chemoattractant-mediated signal transduction. *Science* 287, 1046–1049. <https://doi.org/10.1126/science.287.5455.1046>.
  8. Laffargue, M., Calvez, R., Finan, P., Trifilieff, A., Barbier, M., Altruda, F., Hirsch, E., and Wymann, M.P. (2002). Phosphoinositide 3-kinase gamma is an essential amplifier of mast cell function. *Immunity* 16, 441–451.
  9. Hirsch, E., Katanaev, V.L., Garlanda, C., Azzolino, O., Pirola, L., Silengo, L., Sozzani, S., Mantovani, A., Altruda, F., and Wymann, M.P. (2000). Central role for G protein-coupled phosphoinositide 3-kinase gamma in inflammation. *Science* 287, 1049–1053.
  10. Nürnberg, B., and Beer-Hammer, S. (2019). Function, regulation and biological roles of PI3K $\gamma$  variants. *Biomolecules* 9, E427. <https://doi.org/10.3390/biom9090427>.
  11. Barber, D.F., Bartolomé, A., Hernandez, C., Flores, J.M., Redondo, C., Fernandez-Arias, C., Camps, M., Rückle, T., Schwarz, M.K., Rodríguez, S., et al. (2005). PI3Kgamma inhibition blocks glomerulonephritis and extends lifespan in a mouse model of systemic lupus. *Nat. Med.* 11, 933–935. <https://doi.org/10.1038/nm1291>.
  12. Camps, M., Rückle, T., Ji, H., Ardisson, V., Rintelen, F., Shaw, J., Ferrandi, C., Chabert, C., Gillieron, C., Françon, B., et al. (2005). Blockade of PI3Kgamma suppresses joint inflammation and damage in mouse models of rheumatoid arthritis. *Nat. Med.* 11, 936–943. <https://doi.org/10.1038/nm1284>.
  13. Fougerat, A., Gayral, S., Gourdy, P., Schambourg, A., Rückle, T., Schwarz, M.K., Rommel, C., Hirsch, E., Arnal, J.-F., Salles, J.-P., et al. (2008). Genetic and pharmacological targeting of phosphoinositide 3-kinase-gamma reduces atherosclerosis and favors plaque stability by modulating inflammatory processes. *Circulation* 117, 1310–1317. <https://doi.org/10.1161/CIRCULATIONAHA.107.720466>.
  14. Campa, C.C., Silva, R.L., Margaria, J.P., Pirali, T., Mattos, M.S., Kraemer, L.R., Reis, D.C., Grosa, G., Copperi, F., Dalmarco, E.M., et al. (2018). Inhalation of the prodrug PI3K inhibitor CL27c improves lung function in asthma and fibrosis. *Nat. Commun.* 9, 5232. <https://doi.org/10.1038/s41467-018-07698-6>.
  15. Becattini, B., Marone, R., Zani, F., Arsenijevic, D., Seydoux, J., Montani, J.P., Dulloo, A.G., Thorens, B., Preitner, F., Wymann, M.P., and Solinas, G. (2011). PI3Kgamma within a nonhematopoietic cell type negatively regulates diet-induced thermogenesis and promotes obesity and insulin resistance. *Proc. Natl. Acad. Sci. USA* 108, E854–E863. <https://doi.org/10.1073/pnas.1106698108/-DCSupplemental>.
  16. Breasson, L., Becattini, B., Sardi, C., Molinaro, A., Zani, F., Marone, R., Botindari, F., Bousquenaud, M., Ruegg, C., Wymann, M.P., and Solinas, G. (2017). PI3K $\gamma$  activity in leukocytes promotes adipose tissue inflammation and early-onset insulin resistance during obesity. *Sci. Signal.* 10, eaaf2969. <https://doi.org/10.1126/scisignal.aaf2969>.
  17. Torres, C., Mancinelli, G., Cordoba-Chacon, J., Viswakarma, N., Castellanos, K., Grimaldo, S., Kumar, S., Principe, D., Dorman, M.J., McKinney, R., et al. (2019). p110 $\gamma$  deficiency protects against pancreatic carcinogenesis yet predisposes to diet-induced hepatotoxicity. *Proc. Natl. Acad. Sci. USA* 116, 14724–14733. <https://doi.org/10.1073/pnas.1813012116>.
  18. Zhang, S., Chung, W.-C., Wu, G., Egan, S.E., Miele, L., and Xu, K. (2015). Manic fringe promotes a claudin-low breast cancer phenotype through notch-mediated PIK3CG induction. *Cancer Res.* 75, 1936–1943. <https://doi.org/10.1158/0008-5472.CAN-14-3303>.
  19. Kaneda, M.M., Messer, K.S., Ralainirina, N., Li, H., Leem, C.J., Gorjestani, S., Woo, G., Nguyen, A.V., Figueiredo, C.C., Foubert, P., et al. (2016). PI3K $\gamma$  is a molecular switch that controls immune suppression. *Nature* 539, 437–442. <https://doi.org/10.1038/nature19834>.
  20. De Henau, O., Rausch, M., Winkler, D., Campesato, L.F., Liu, C., Cymerman, D.H., Budhu, S., Ghosh, A., Pink, M., Tchaicha, J., et al. (2016). Overcoming resistance to checkpoint blockade therapy by targeting PI3K $\gamma$  in myeloid cells. *Nature* 539, 443–447. <https://doi.org/10.1038/nature20554>.
  21. Li, H., Prever, L., Hirsch, E., and Gulluni, F. (2021). Targeting PI3K/AKT/mTOR signaling pathway in breast cancer. *Cancers* 13, 3517. <https://doi.org/10.3390/cancers13143517>.
  22. Takeda, A.J., Maher, T.J., Zhang, Y., Lanahan, S.M., Bucklin, M.L., Compton, S.R., Tyler, P.M., Comrie, W.A., Matsuda, M., Olivier, K.N., et al. (2019). Human PI3K $\gamma$  deficiency and its microbiota-dependent mouse model reveal immunodeficiency and tissue immunopathology. *Nat. Commun.* 10, 4364. <https://doi.org/10.1038/s41467-019-12311-5>.
  23. Thian, M., Hoeger, B., Kamnev, A., Poyer, F., Köstel Bal, S., Caldera, M., Jiménez-Heredia, R., Huemer, J., Pickl, W.F., Groß, M., et al. (2020). Germline biallelic PIK3CG mutations in a multifaceted immunodeficiency with immune dysregulation. *Haematologica* 105, e488. <https://doi.org/10.3324/haematol.2019.231399>.
  24. Stoyanov, B., Volinia, S., Hanck, T., Rubio, I., Loubtchenkov, M., Malek, D., Stoyanova, S., Vanhaesebroeck, B., Dhand, R., and Nürnberg, B. (1995). Cloning and characterization of a G protein-activated human phosphoinositide-3 kinase. *Science* 269, 690–693. <https://doi.org/10.1126/science.7624799>.
  25. Schmid, M.C., Avraamides, C.J., Dippold, H.C., Franco, I., Foubert, P., El-lies, L.G., Acevedo, L.M., Manglicmot, J.R.E., Song, X., Wrasidlo, W., et al. (2011). Receptor tyrosine kinases and TLR/IL1Rs unexpectedly activate myeloid cell PI3k $\gamma$ , a single convergent point promoting tumor inflammation and progression. *Cancer Cell* 19, 715–727. <https://doi.org/10.1016/j.ccr.2011.04.016>.
  26. Luo, L., Wall, A.A., Yeo, J.C., Condon, N.D., Norwood, S.J., Schoenwaelder, S., Chen, K.W., Jackson, S., Jenkins, B.J., Hartland, E.L., et al. (2014). Rab8a interacts directly with PI3K $\gamma$  to modulate TLR4-driven PI3K and mTOR signalling. *Nat. Commun.* 5, 4407. <https://doi.org/10.1038/ncomms5407>.
  27. Deladeriere, A., Gambardella, L., Pan, D., Anderson, K.E., Hawkins, P.T., and Stephens, L.R. (2015). The regulatory subunits of PI3K $\gamma$  control distinct neutrophil responses. *Sci. Signal.* 8, ra8. <https://doi.org/10.1126/scisignal.2005564>.
  28. Rynkiewicz, N.K., Anderson, K.E., Suire, S., Collins, D.M., Karanasios, E., Vadas, O., Williams, R., Oxley, D., Clark, J., Stephens, L.R., and Hawkins, P.T. (2020). G $\beta\gamma$  is a direct regulator of endogenous p101/p110 $\gamma$  and p84/p110 $\gamma$  PI3K $\gamma$  complexes in mouse neutrophils. *Sci. Signal.* 13, eaaz4003. <https://doi.org/10.1126/scisignal.aaz4003>.
  29. Bohnacker, T., Marone, R., Collmann, E., Calvez, R., Hirsch, E., and Wymann, M.P. (2009). PI3Kgamma adaptor subunits define coupling to degranulation and cell motility by distinct PtdIns(3,4,5)P3 pools in mast cells. *Sci. Signal.* 2, ra27. <https://doi.org/10.1126/scisignal.2000259>.
  30. Vadas, O., Dbouk, H.A., Shymanets, A., Perisic, O., Burke, J.E., Abi Saab, W.F., Khalil, B.D., Harteneck, C., Bresnick, A.R., Nürnberg, B., et al. (2013). Molecular determinants of PI3K $\gamma$ -mediated activation downstream of G-protein-coupled receptors (GPCRs). *Proc. Natl. Acad. Sci. USA* 110, 18862–18867. <https://doi.org/10.1073/pnas.1304801110>.
  31. Maier, U., Babich, A., and Nürnberg, B. (1999). Roles of non-catalytic subunits in gbetagamma-induced activation of class I phosphoinositide 3-kinase isoforms beta and gamma. *J. Biol. Chem.* 274, 29311–29317.
  32. Rathinaswamy, M.K., Dalwadi, U., Fleming, K.D., Adams, C., Stariha, J.T.B., Pardon, E., Baek, M., Vadas, O., DiMaio, F., Steyaert, J., et al. (2021). Structure of the phosphoinositide 3-kinase (PI3K) p110 $\gamma$ -p101 complex reveals molecular mechanism of GPCR activation. *Sci. Adv.* 7, eabj4282. <https://doi.org/10.1126/sciadv.abj4282>.
  33. Shymanets, A., Prajwal, P., Bucher, K., Beer-Hammer, S., Harteneck, C., and Nürnberg, B. (2013). p87 and p101 subunits are distinct regulators determining class IB phosphoinositide 3-kinase (PI3K) specificity.

- J. Biol. Chem. 288, 31059–31068. <https://doi.org/10.1074/jbc.M113.508234>.
34. Kurig, B., Shymanets, A., Bohnacker, T., Prajwal, Brock, C., Ahmadian, M.R., Schaefer, M., Gohla, A., Harteneck, C., Wymann, M.P., et al. (2009). Ras is an indispensable coregulator of the class IB phosphoinositide 3-kinase p87/p110gamma. *Proc. Natl. Acad. Sci. USA* 106, 20312–20317. <https://doi.org/10.1073/pnas.0905506106>.
  35. Walker, E.H., Perisic, O., Ried, C., Stephens, L., and Williams, R.L. (1999). Structural insights into phosphoinositide 3-kinase catalysis and signalling. *Nature* 402, 313–320. <https://doi.org/10.1038/46319>.
  36. Rathinaswamy, M.K., Galeb, Z., Fleming, K.D., Borsari, C., Harris, N.J., Moeller, B.E., Wymann, M.P., Amaro, R.E., and Burke, J.E. (2021). Disease-related mutations in PI3K $\gamma$  disrupt regulatory C-terminal dynamics and reveal a path to selective inhibitors. *Elife* 10, e64691. <https://doi.org/10.7554/eLife.64691>.
  37. Pacold, M.E., Suire, S., Perisic, O., Lara-Gonzalez, S., Davis, C.T., Walker, E.H., Hawkins, P.T., Stephens, L., Eccleston, J.F., and Williams, R.L. (2000). Crystal structure and functional analysis of Ras binding to its effector phosphoinositide 3-kinase gamma. *Cell* 103, 931–943.
  38. Shymanets, A., Ahmadian, M.R., Kössmeier, K.T., Wetzker, R., Harteneck, C., and Nürnberg, B. (2012). The p101 subunit of PI3K $\gamma$  restores activation by G $\beta$  mutants deficient in stimulating p110 $\gamma$ . *Biochem. J.* 441, 851–858. <https://doi.org/10.1042/BJ20111664>.
  39. Jumper, J., Evans, R., Pritzel, A., Green, T., Figurnov, M., Ronneberger, O., Tunyasuvunakool, K., Bates, R., Židek, A., Potapenko, A., et al. (2021). Highly accurate protein structure prediction with AlphaFold. *Nature* 596, 583–589. <https://doi.org/10.1038/s41586-021-03819-2>.
  40. Evans, R., O'Neill, M., Pritzel, A., Antropova, N., Senior, A., Green, T., Židek, A., Bates, R., Blackwell, S., Yim, J., et al. (2021). Protein complex prediction with AlphaFold-multimer. Preprint at bioRxiv. <https://doi.org/10.1101/2021.10.04.463034>.
  41. Gangadhara, G., Dahl, G., Bohnacker, T., Rae, R., Gunnarsson, J., Blaho, S., Öster, L., Lindmark, H., Karabelas, K., Pemberton, N., et al. (2019). A class of highly selective inhibitors bind to an active state of PI3K $\gamma$ . *Nat. Chem. Biol.* 15, 348–357. <https://doi.org/10.1038/s41589-018-0215-0>.
  42. Lodowski, D.T., Pitcher, J.A., Capel, W.D., Lefkowitz, R.J., and Tesmer, J.J.G. (2003). Keeping G proteins at bay: a complex between G protein-coupled receptor kinase 2 and G $\beta$  $\gamma$ . *Science* 300, 1256–1262. <https://doi.org/10.1126/science.1082348>.
  43. Okkenhaug, K. (2013). Signaling by the phosphoinositide 3-kinase family in immune cells. *Annu. Rev. Immunol.* 31, 675–704. <https://doi.org/10.1146/annurev-immunol-032712-095946>.
  44. Shymanets, A., Prajwal, Vadas, O., Czupalla, C., LoPiccolo, J., Brenowitz, M., Ghigo, A., Hirsch, E., Krause, E., Wetzker, R., et al. (2015). Different inhibition of G $\beta$  $\gamma$ -stimulated class IB phosphoinositide 3-kinase (PI3K) variants by a monoclonal antibody. Specific function of p101 as a G $\beta$  $\gamma$ -dependent regulator of PI3K $\gamma$  enzymatic activity. *Biochem. J.* 469, 59–69. <https://doi.org/10.1042/BJ20150099>.
  45. Walser, R., Burke, J.E., Gogvadze, E., Bohnacker, T., Zhang, X., Hess, D., Küenzi, P., Leitges, M., Hirsch, E., Williams, R.L., et al. (2013). PKC $\beta$  phosphorylates PI3K $\gamma$  to activate it and release it from GPCR control. *PLoS Biol.* 11, e1001587. <https://doi.org/10.1371/journal.pbio.1001587>.
  46. Jin, J.R., Gogvadze, E., Xavier, A.R., Bohnacker, T., Voelzmann, J., and Wymann, M.P. (2020). PI3K $\gamma$  regulatory protein p84 determines mast cell sensitivity to Ras inhibition-moving towards cell specific PI3K targeting? *Front. Immunol.* 11, 585070. <https://doi.org/10.3389/fimmu.2020.585070>.
  47. Burke, J.E., Vadas, O., Berndt, A., Finegan, T., Perisic, O., and Williams, R.L. (2011). Dynamics of the phosphoinositide 3-kinase p110 $\delta$  interaction with p85 $\alpha$  and membranes reveals aspects of regulation distinct from p110 $\alpha$ . *Structure* 19, 1127–1137. <https://doi.org/10.1016/j.str.2011.06.003>.
  48. Burke, J.E., Perisic, O., Masson, G.R., Vadas, O., and Williams, R.L. (2012). Oncogenic mutations mimic and enhance dynamic events in the natural activation of phosphoinositide 3-kinase p110 $\alpha$  (PIK3CA). *Proc. Natl. Acad. Sci. USA* 109, 15259–15264. <https://doi.org/10.1073/pnas.1205508109>.
  49. Yu, J., Zhang, Y., McIlroy, J., Rordorf-Nikolic, T., Orr, G.A., and Backer, J.M. (1998). Regulation of the p85/p110 phosphatidylinositol 3'-kinase: stabilization and inhibition of the p110alpha catalytic subunit by the p85 regulatory subunit. *Mol. Cell Biol.* 18, 1379–1387.
  50. Brock, C., Schaefer, M., Reusch, H.P., Czupalla, C., Michalke, M., Spicher, K., Schultz, G., and Nürnberg, B. (2003). Roles of G beta gamma in membrane recruitment and activation of p110 gamma/p101 phosphoinositide 3-kinase gamma. *J. Cell Biol.* 160, 89–99. <https://doi.org/10.1083/jcb.200210115>.
  51. Dbouk, H.A., Vadas, O., Shymanets, A., Burke, J.E., Salamon, R.S., Khalil, B.D., Barrett, M.O., Waldo, G.L., Surve, C., Hsueh, C., et al. (2012). G protein-coupled receptor-mediated activation of p110 $\beta$  by G $\beta$  $\gamma$  is required for cellular transformation and invasiveness. *Sci. Signal.* 5, ra89. <https://doi.org/10.1126/scisignal.2003264>.
  52. Rathinaswamy, M.K., Fleming, K.D., Dalwadi, U., Pardon, E., Harris, N.J., Yip, C.K., Steyaert, J., and Burke, J.E. (2021). HDX-MS-optimized approach to characterize nanobodies as tools for biochemical and structural studies of class IB phosphoinositide 3-kinases. *Structure* 29, 1371–1381.e6. <https://doi.org/10.1016/j.str.2021.07.002>.
  53. Szwed, A., Kim, E., and Jacinto, E. (2021). Regulation and metabolic functions of mTORC1 and mTORC2. *Physiol. Rev.* 101, 1371–1426. <https://doi.org/10.1152/physrev.00026.2020>.
  54. Siempelkamp, B.D., Rathinaswamy, M.K., Jenkins, M.L., and Burke, J.E. (2017). Molecular mechanism of activation of class IA phosphoinositide 3-kinases (PI3Ks) by membrane-localized HRas. *J. Biol. Chem.* 292, 12256–12266. <https://doi.org/10.1074/jbc.M117.789263>.
  55. Robert, X., and Gouet, P. (2014). Deciphering key features in protein structures with the new ENDscript server. *Nucl. Acids Res.* 42, W320–W324.
  56. Kozasa, T. (2004). Purification of G protein subunits from Sf9 insect cells using hexahistidine-tagged alpha and beta gamma subunits. *Methods Mol. Biol.* 237, 21–38. <https://doi.org/10.1385/1-59259-430-1:21>.
  57. Jaitner, B.K., Becker, J., Linnemann, T., Herrmann, C., Wittinghofer, A., and Block, C. (1997). Discrimination of amino acids mediating Ras binding from noninteracting residues affecting Raf activation by double mutant analysis. *J. Biol. Chem.* 272, 29927–29933.
  58. Huang, W.Y.C., Alvarez, S., Kondo, Y., Lee, Y.K., Chung, J.K., Lam, H.Y.M., Biswas, K.H., Kuriyan, J., and Groves, J.T. (2019). A molecular assembly phase transition and kinetic proofreading modulate Ras activation by SOS. *Science* 363, 1098–1103. <https://doi.org/10.1126/science.aau5721>.
  59. Yin, J., Lin, A.J., Golan, D.E., and Walsh, C.T. (2006). Site-specific protein labeling by Sfp phosphopantetheinyl transferase. *Nat. Protoc.* 1, 280–285. <https://doi.org/10.1038/nprot.2006.43>.
  60. Ziemba, B.P., Swisher, G.H., Masson, G., Burke, J.E., Williams, R.L., and Falke, J.J. (2016). Regulation of a coupled MARCKS-PI3K lipid kinase circuit by calmodulin: single-molecule analysis of a membrane-bound signaling module. *Biochemistry* 55, 6395–6405. <https://doi.org/10.1021/acs.biochem.6b00908>.
  61. Hansen, S.D., Huang, W.Y.C., Lee, Y.K., Bieling, P., Christensen, S.M., and Groves, J.T. (2019). Stochastic geometry sensing and polarization in a lipid kinase-phosphatase competitive reaction. *Proc. Natl. Acad. Sci. USA* 116, 15013–15022. <https://doi.org/10.1073/pnas.1901744116>.
  62. Mirdita, M., Schütze, K., Moriwaki, Y., Heo, L., Ovchinnikov, S., and Steinegger, M. (2022). ColabFold: making protein folding accessible to all. *Nat. Methods* 19, 679–682. <https://doi.org/10.1038/s41592-022-01488-1>.
  63. Gorrec, F., and Löwe, J. (2018). Automated protocols for macromolecular crystallization at the MRC laboratory of molecular Biology. *J. Vis. Exp.*, 55790. <https://doi.org/10.3791/55790>.

64. Stock, D., Perisic, O., and Löwe, J. (2005). Robotic nanolitre protein crystallisation at the MRC laboratory of molecular Biology. *Prog. Biophys. Mol. Biol.* *88*, 311–327.
65. Gorrec, F. (2009). The MORPHEUS protein crystallization screen. *J. Appl. Crystallogr.* *42*, 1035–1042. <https://doi.org/10.1107/S0021889809042022>.
66. Powell, H.R., Batty, T.G.G., Kontogiannis, L., Johnson, O., and Leslie, A.G.W. (2017). Integrating macromolecular X-ray diffraction data with the graphical user interface iMosflm. *Nat. Protoc.* *12*, 1310–1325. <https://doi.org/10.1038/nprot.2017.037>.
67. Evans, P. (2006). Scaling and assessment of data quality. *Acta Crystallogr. D Biol. Crystallogr.* *62*, 72–82. <https://doi.org/10.1107/S0907444905036693>.
68. McCoy, A.J., Grosse-Kunstleve, R.W., Adams, P.D., Winn, M.D., Storoni, L.C., and Read, R.J. (2007). Phaser crystallographic software. *J. Appl. Crystallogr.* *40*, 658–674. <https://doi.org/10.1107/S0021889807021206>.
69. Afonine, P.V., Grosse-Kunstleve, R.W., Echols, N., Headd, J.J., Moriarty, N.W., Mustyakimov, M., Terwilliger, T.C., Urzhumtsev, A., Zwart, P.H., and Adams, P.D. (2012). Towards automated crystallographic structure refinement with phenix.refine. *Acta Crystallogr. D Biol. Crystallogr.* *68*, 352–367. <https://doi.org/10.1107/S0907444912001308>.
70. Emsley, P., Lohkamp, B., Scott, W.G., and Cowtan, K. (2010). Features and development of coot. *Acta Crystallogr. D Biol. Crystallogr.* *66*, 486–501. <https://doi.org/10.1107/S0907444910007493>.
71. Dobbs, J.M., Jenkins, M.L., and Burke, J.E. (2020). Escherichia coli and Sf9 contaminant databases to increase efficiency of tandem mass spectrometry peptide identification in structural mass spectrometry experiments. *J. Am. Soc. Mass Spectrom.* *31*, 2202–2209. <https://doi.org/10.1021/jasms.0c00283>.
72. Jaqaman, K., Loerke, D., Mettlen, M., Kuwata, H., Grinstein, S., Schmid, S.L., and Danuser, G. (2008). Robust single-particle tracking in live-cell time-lapse sequences. *Nat. Methods* *5*, 695–702. <https://doi.org/10.1038/nmeth.1237>.
73. Masson, G.R., Burke, J.E., Ahn, N.G., Anand, G.S., Borchers, C., Brier, S., Bou-Assaf, G.M., Engen, J.R., Englander, S.W., Faber, J., et al. (2019). Recommendations for performing, interpreting and reporting hydrogen deuterium exchange mass spectrometry (HDX-MS) experiments. *Nat. Methods* *16*, 595–602. <https://doi.org/10.1038/s41592-019-0459-y>.



## STAR★METHODS

### KEY RESOURCES TABLE

| REAGENT or RESOURCE                                                                                                      | SOURCE                            | IDENTIFIER             |
|--------------------------------------------------------------------------------------------------------------------------|-----------------------------------|------------------------|
| <b>Bacterial and virus strains</b>                                                                                       |                                   |                        |
| E.coli XL10-GOLD KanR Ultracompetent Cells                                                                               | Agilent                           | 200317                 |
| E.coli DH10EMBacY Competent Cells                                                                                        | Geneva Biotech                    | DH10EMBacY             |
| <b>Chemicals, peptides, and recombinant proteins</b>                                                                     |                                   |                        |
| Deuterium Oxide 99.9%                                                                                                    | Sigma                             | 151882                 |
| GTP $\gamma$ S                                                                                                           | Sigma                             | 10220647001            |
| Guanosine 5'-diphosphate (GDP) sodium salt hydrate                                                                       | Sigma                             | G7127-100MG            |
| Guanosine 5'-triphosphate (GTP) sodium salt hydrate                                                                      | Sigma                             | G8877-250MG            |
| Sodium deoxycholate                                                                                                      | Sigma                             | D6750                  |
| Polyoxyethylene (10) lauryl ether                                                                                        | Sigma                             | P9769                  |
| CHAPS, Molecular Biology Grade                                                                                           | EMD Millipore                     | 220201                 |
| Phosphatidylserine (Porcine Brain)                                                                                       | Avanti                            | 840032C                |
| Phosphatidylethanolamine (Egg yolk)                                                                                      | Sigma                             | P6386                  |
| Cholesterol                                                                                                              | Sigma                             | 47127-U                |
| Phosphatidylcholine (Egg yolk)                                                                                           | Avanti                            | 840051C                |
| Phosphatidylinositol-4,5-bisphosphate (Porcine Brain)                                                                    | Avanti                            | 840046                 |
| Sphingomyelin (Egg yolk)                                                                                                 | Sigma                             | S0756                  |
| 1,2-dioleoyl-sn-glycero-3-phosphocholine (DOPC)                                                                          | Avanti                            | 850375C                |
| 1,2-dioleoyl-sn-glycero-3-phospho-L-serine (18:1, DOPS)                                                                  | Avanti                            | 840035C                |
| 1,2-dioleoyl-sn-glycero-3-phosphoethanolamine-N-[4-(p-maleimidomethyl)cyclohexane-carboxamide] (18:1 MCC-PE)             | Avanti                            | 780201C                |
| 10 mg/mL beta casein solution                                                                                            | ThermoFisher                      | 37528                  |
| glucose oxidase from <i>Aspergillus niger</i> (225 U/mg)                                                                 | Biophoretics                      | B01357.02              |
| catalase                                                                                                                 | Sigma                             | C40-100MG Bovine Liver |
| Trolox                                                                                                                   | Cayman Chemicals                  | 10011659               |
| Dyomics 647 maleimide dye                                                                                                | Dyomics                           | 647P1-03               |
| Coenzyme A                                                                                                               | Sigma                             | C3019                  |
| Sulfuric acid                                                                                                            | Sigma                             | 58105-2.5L-PC          |
| <b>Critical commercial assays</b>                                                                                        |                                   |                        |
| Transcreener ADP2 FI Assay (1,000 Assay, 384 Well)                                                                       | BellBrook Labs                    | 3013-1K                |
| <b>Deposited data</b>                                                                                                    |                                   |                        |
| PDB coordinate file for p110 $\gamma$ -p84 structure                                                                     | PDB                               | 8AJ8                   |
| EM density file for p110 $\gamma$ -p84 complex                                                                           | EMD                               | 27738                  |
| HDX-MS proteomics data for all experiments                                                                               | PRIDE                             | PXD035723              |
| <b>Recombinant DNA</b>                                                                                                   |                                   |                        |
| pMultiBac-G $\beta$ 1/G $\gamma$ 2                                                                                       | Rathinaswamy et al. <sup>32</sup> | pOP737                 |
| pACEBac1-hsp110 $\gamma$                                                                                                 | Rathinaswamy et al. <sup>32</sup> | MR30                   |
| pMultiBac-hsp110 $\gamma$ -ssp101                                                                                        | Rathinaswamy et al. <sup>32</sup> | MR22                   |
| pMultiBac-hsp110 $\gamma$ -mmp84                                                                                         | Rathinaswamy et al. <sup>32</sup> | MR24                   |
| pFastBac HRas G12V                                                                                                       | Siempelkamp et al. <sup>54</sup>  | BS9                    |
| biGBac hsp110 $\gamma$ /ybbr-hsp84                                                                                       | This paper                        | HP28                   |
| biGBac hsp110 $\gamma$ /ybbr-hsp101                                                                                      | This paper                        | HP29                   |
| biGBac hsp110 $\gamma$ /ybbr-hsp101 ( $\beta$ 8- $\beta$ 9 loop swap from p84) ( $\Delta$ 699-727, ins p84 resi 566-587) | This paper                        | MJ301                  |
| his6-GST-PrecisionProtease-SNAP-RBD(K65E)                                                                                | This paper                        | pSH936                 |

(Continued on next page)

| <b>Continued</b>                                           |                                   |                                                                                                                                                                                               |
|------------------------------------------------------------|-----------------------------------|-----------------------------------------------------------------------------------------------------------------------------------------------------------------------------------------------|
| REAGENT or RESOURCE                                        | SOURCE                            | IDENTIFIER                                                                                                                                                                                    |
| his6TEV-HRas(1–184aa) C118S, C181S                         | This paper                        | pSH414                                                                                                                                                                                        |
| his6-Gy2, SNAP-Gβ1 (DUAL FastBac)                          | Rathinaswamy et al. <sup>32</sup> | pSH651                                                                                                                                                                                        |
| <b>Software and algorithms</b>                             |                                   |                                                                                                                                                                                               |
| COOT-0.9.4.1                                               | CCP4                              | <a href="https://www2.mrc-lmb.cam.ac.uk/personal/pemsley/coot/">https://www2.mrc-lmb.cam.ac.uk/personal/pemsley/coot/</a>                                                                     |
| Phenix-1.19.1                                              | Open source                       | <a href="https://www.phenix-online.org/">https://www.phenix-online.org/</a>                                                                                                                   |
| PDBePISA (Proteins, Interfaces, Structures and Assemblies) | EMBL-EBI                          | <a href="https://www.ebi.ac.uk/pdbe/pisa/pistart.html">https://www.ebi.ac.uk/pdbe/pisa/pistart.html</a>                                                                                       |
| ESPrpt 3.0                                                 | Robert et al. <sup>55</sup>       | <a href="https://esprpt.ibcp.fr">https://esprpt.ibcp.fr</a>                                                                                                                                   |
| HDExaminer                                                 | Sierra Analytics                  | <a href="http://massspec.com/hdexaminer">http://massspec.com/hdexaminer</a>                                                                                                                   |
| GraphPad Prism 7                                           | GraphPad                          | <a href="https://www.graphpad.com">https://www.graphpad.com</a>                                                                                                                               |
| PyMOL                                                      | Schroedinger                      | <a href="http://pymol.org">http://pymol.org</a>                                                                                                                                               |
| Compass Data Analysis                                      | Bruker                            | <a href="https://www.bruker.com">https://www.bruker.com</a>                                                                                                                                   |
| ChimeraX                                                   | UCSF                              | <a href="https://www.rbvi.ucsf.edu/chimera/">https://www.rbvi.ucsf.edu/chimera/</a>                                                                                                           |
| AlphaFold2- Multimer                                       | DeepMind                          | <a href="https://colab.research.google.com/github/sokrypton/ColabFold/blob/main/AlphaFold2.ipynb">https://colab.research.google.com/github/sokrypton/ColabFold/blob/main/AlphaFold2.ipynb</a> |
| ImageJ/Fiji                                                | ImageJ                            | <a href="https://imagej.net/software/fiji/">https://imagej.net/software/fiji/</a>                                                                                                             |
| Nikon NIS elements                                         | Nikon                             | <a href="https://www.microscope.healthcare.nikon.com/products/software/nis-elements">https://www.microscope.healthcare.nikon.com/products/software/nis-elements</a>                           |
| <b>Other</b>                                               |                                   |                                                                                                                                                                                               |
| Sf9 insect cells for expression                            | Expression Systems                | 94–001S                                                                                                                                                                                       |
| Insect cell media                                          | Expression Systems                | 96-001-01                                                                                                                                                                                     |
| Hellmanex III cleaning solution                            | Fisher                            | 14-385-864                                                                                                                                                                                    |
| 6-well sticky-side chamber                                 | IBIDI                             | 80608                                                                                                                                                                                         |

## RESOURCE AVAILABILITY

### Lead contact

Further information and requests for resources and reagents should be directed to and will be fulfilled by the lead contact, John E Burke ([jeburke@uvic.ca](mailto:jeburke@uvic.ca)).

### Materials availability

This study did not generate new unique reagents.

### Data and code availability

- The data underlying this manuscript are available at the following databases: The mass spectrometry proteomics data have been deposited to the ProteomeXchange Consortium via the PRIDE partner repository<sup>1</sup> with the dataset identifier PXD035723, the X-ray crystallography data and model for the p110 $\gamma$ -p84 structure was deposited in the Protein DataBank (PDB), with the identifier PDB: 8AJ8, the EM density for the p110 $\gamma$ -p84 complex was deposited in the Electron Microscopy DataBank with the identifier 27738, and are publicly available as of the date of publication. Accession numbers are listed in the [key resources table](#).
- This paper does not report original code
- Any additional information required to reanalyze the data reported in this paper is available from the [lead contact](#) upon request.

## EXPERIMENTAL MODEL AND SUBJECT DETAILS

All p110 $\gamma$ , p101, and p84 samples were grown in *Spodoptera frugiperda* (Sf9) cells. Sf9 cells (94–001S) were obtained from Expression Systems (CA, USA) and were cultured in ESF 921 media (96-001-01, Expression Systems, CA, USA) at 27°C.

## METHOD DETAILS

### Plasmid generation

Plasmids encoding Homo sapiens p110 $\gamma$  (human), Mus musculus p84 (mouse), Sus scrofa p101 (porcine), and G $\beta\gamma$  were used as previously described.<sup>32</sup> The full-length human PIK3R5 (p101) gene was purchased from Addgene (70464), and the full-length human PIK3R6 (p84) gene was purchased from DanaFarber (HsCD00462228). Plasmids encoding HRas was used as previously described.<sup>54</sup> PI3K genes were subcloned into pLIB vectors for expression with no engineered tags, while in the case of p110 $\gamma$  a TEV cleavable C-terminal 10x histidine and 2x strep tag was added. Genes were subsequently amplified following the biGBac protocol to generate plasmids containing hsP110 $\gamma$ /hsP101 and hsP110 $\gamma$ /hsP84.

For purification, a 10x histidine tag, a 2x strep tag, and a tobacco etch virus protease cleavage site were cloned to the N terminus of the regulatory subunits for the complex and to p110 $\gamma$  for constructs without regulatory subunits.

### Virus generation and amplification

The plasmids encoding genes for insect cell expression were transformed into DH10MultiBac cells (MultiBac, Geneva Biotech) to generate baculovirus plasmid (bacmid) containing the genes of interest. Successful generation was identified by blue-white colony screening and the bacmid was purified using a standard isopropanol-ethanol extraction method. Bacteria were grown overnight (16 h) in 3–5 mL 2xYT (BioBasic #SD7019). Cells were spun down and the pellet was resuspended in 300  $\mu$ L of 50 mM Tris-HCl, pH 8.0, 10 mM EDTA, 100 mg/mL RNase A. The pellet was lysed by the addition of 300  $\mu$ L of 1% sodium dodecyl sulfate (SDS) (W/V), 200 mM NaOH, and the reaction was neutralized by addition of 400  $\mu$ L of 3.0 M potassium acetate, pH 5.5. Following centrifugation at 21130 RCF and 4°C (Rotor #5424 R), the supernatant was mixed with 800  $\mu$ L isopropanol to precipitate bacmid DNA. Following centrifugation, the pelleted bacmid DNA was washed with 500  $\mu$ L 70% Ethanol three times. The pellet was then air dried for 1 min and re-suspended in 50  $\mu$ L Buffer EB (10 mM Tris-Cl, pH 8.5; All buffers from QIAprep Spin Miniprep Kit, Qiagen #27104). Purified bacmid was then transfected into Sf9 cells. 2 mL of Sf9 cells at 0.6X10<sup>6</sup> cells/mL were aliquoted into a 6-well plate and allowed to attach to form a confluent layer. Transfection reactions were prepared mixing 8–12  $\mu$ g of bacmid DNA in 100  $\mu$ L 1xPBS and 12  $\mu$ g polyethylenimine (Polyethylenimine “Max” MW 40,000, Polysciences #24765, USA) in 100  $\mu$ L 1xPBS and the reaction was allowed to proceed for 20–30 min before addition to an Sf9 monolayer containing well. Transfections were allowed to proceed for 5–6 days before harvesting virus containing supernatant as a P1 viral stock.

Viral stocks were further amplified by adding P1 to Sf9 cells at  $\sim 2 \times 10^6$  cells/mL (2/100 volume ratio). This amplification was allowed to proceed for 4–5 days and resulted in a P2 stage viral stock that was used in final protein expression. Harvesting of P2 viral stocks was carried out by centrifuging cell suspensions in 50 mL Falcon tubes at 2281 RCF (Beckman GS-15). To the supernatant containing virus, 5–10% inactivated fetal bovine serum (FBS; VWR Canada #97068-085) was added and the stock was stored at 4°C.

### Expression and purification of PI3K $\gamma$ constructs

PI3K $\gamma$  constructs were expressed in Sf9 insect cells using the baculovirus expression system. Following 55 h of expression, cells were harvested by centrifuging at 1680 RCF (Eppendorf Centrifuge 5810 R) and the pellets were snap-frozen in liquid nitrogen. The complex was purified through a combination of nickel affinity, streptavidin affinity and size exclusion chromatographic techniques.

Frozen insect cell pellets were resuspended in lysis buffer (20 mM Tris pH 8.0, 100 mM NaCl, 10 mM imidazole pH 8.0, 5% glycerol (v/v), 2 mM  $\beta$ ME), protease inhibitor (Protease Inhibitor Cocktail Set III, Sigma) and sonicated for 2 min (15s on, 15s off, level 4.0, Misonix sonicator 3000). Triton X- was added to the lysate to a final concentration of 0.1% and clarified by spinning at 15,000 RCF at 4°C for 45 min (Beckman Coulter JA-20 rotor). The supernatant was loaded onto a 5 mL HisTrap<sup>TM</sup> FF crude column (GE Healthcare) equilibrated in NiNTA A buffer (20 mM Tris pH 8.0, 100 mM NaCl, 20 mM imidazole pH 8.0, 5% (v/v) glycerol, 2 mM  $\beta$ ME). The column was washed with high salt NiNTA A buffer (20 mM Tris pH 8.0, 1 M NaCl, 20 mM imidazole pH 8.0, 5% (v/v) glycerol, 2 mM  $\beta$ ME), NiNTA A buffer, 6% NiNTA B buffer (20 mM Tris pH 8.0, 100 mM NaCl, 250 mM imidazole pH 8.0, 5% (v/v) glycerol, 2 mM  $\beta$ ME) and the protein was eluted with 100% NiNTA B. The eluent was loaded onto a 5 mL StrepTrap<sup>TM</sup> HP column (GE Healthcare) equilibrated in gel filtration buffer (20mM Tris pH 8.5, 100 mM NaCl, 50 mM Ammonium Sulfate and 0.5 mM TCEP). The column was washed with the same buffer and loaded with tobacco etch virus protease. After cleavage on the column overnight, the protein was eluted in gel filtration buffer. The protein was concentrated in a 50,000 MWCO Amicon Concentrator (Millipore) to <1 mL and injected onto a Superdex<sup>TM</sup> 200 10/300 GL Increase size-exclusion column (GE Healthcare) equilibrated in gel filtration buffer. After size exclusion, the protein was concentrated, aliquoted, frozen, and stored at  $-80^{\circ}$ C.

### Expression and purification of lipidated G $\beta\gamma$ for kinase activity assays

Full length, lipidated human G $\beta\gamma$  (G $\beta$ 1 $\gamma$ 2) was expressed in Sf9 insect cells and purified as described previously.<sup>56</sup> After 65 h of expression, cells were harvested, and the pellets were frozen as described above. Pellets were resuspended in lysis buffer (20 mM HEPES pH 7.7, 100 mM NaCl, 10 mM  $\beta$ ME, protease inhibitor (Protease Inhibitor Cocktail Set III, Sigma)) and sonicated for 2 min (15s on, 15s off, level 4.0, Misonix sonicator 3000). The lysate was spun at 500 RCF (Eppendorf Centrifuge 5810 R) to remove intact cells and the supernatant was centrifuged again at 25,000 RCF for 1 h (Beckman Coulter JA-20 rotor). The pellet was resuspended in lysis buffer and sodium cholate was added to a final concentration of 1% and stirred at 4°C for 1 h. The membrane extract

was clarified by spinning at 10,000 RCF for 30 min (Beckman Coulter JA-20 rotor). The supernatant was diluted 3 times with NiNTA A buffer (20 mM HEPES pH 7.7, 100 mM NaCl, 10 mM Imidazole, 0.1% C12E10, 10mM  $\beta$ ME) and loaded onto a 5 mL HisTrap<sup>TM</sup> FF crude column (GE Healthcare) equilibrated in the same buffer. The column was washed with NiNTA A, 6% NiNTA B buffer (20 mM HEPES pH 7.7, 25 mM NaCl, 250 mM imidazole pH 8.0, 0.1% C12E10, 10 mM  $\beta$ ME) and the protein was eluted with 100% NiNTA B. The eluent was loaded onto HiTrap<sup>TM</sup> Q HP anion exchange column equilibrated in Hep A buffer (20 mM Tris pH 8.0, 8 mM CHAPS, 2 mM Dithiothreitol (DTT)). A gradient was started with Hep B buffer (20 mM Tris pH 8.0, 500 mM NaCl, 8 mM CHAPS, 2 mM DTT) and the protein was eluted in ~50% Hep B buffer. The eluent was concentrated in a 30,000 MWCO Amicon Concentrator (Millipore) to <1 mL and injected onto a Superdex<sup>TM</sup> 75 10/300 GL size exclusion column (GE Healthcare) equilibrated in Gel Filtration buffer (20 mM HEPES pH 7.7, 100 mM NaCl, 10 mM CHAPS, 2 mM TCEP). Fractions containing protein were pooled, concentrated, aliquoted, frozen and stored at  $-80^{\circ}\text{C}$ .

### Expression and purification of lipidated HRas G12V for ATPase and HDX-MS experiments

Full-length HRas G12V was expressed by infecting 500 mL of Sf9 cells with 5 mL of baculovirus. Cells were harvested after 55 h of infection and frozen as described above. The frozen cell pellet was resuspended in lysis buffer (50 mM HEPES pH 7.5, 100 mM NaCl, 10 mM  $\beta$ ME and protease inhibitor (Protease Inhibitor Cocktail Set III, Sigma)) and sonicated on ice for 1 min 30 s (15s ON, 15s OFF, power level 4.0) on a Misonix sonicator 3000. Triton X-114 was added to the lysate to a final concentration of 1%, mixed for 10 min at  $4^{\circ}\text{C}$  and centrifuged at 25,000 rpm for 45 min (Beckman Ti-45 rotor). The supernatant was warmed to  $37^{\circ}\text{C}$  for few minutes until it turned cloudy following which it was centrifuged at 11,000 rpm at room temperature for 10 min (Beckman JA-20 rotor) to separate the soluble and detergent-enriched phases. The soluble phase was removed, and Triton X-114 was added to the detergent-enriched phase to a final concentration of 1%. Phase separation was performed 3 times. Imidazole pH 8.0 was added to the detergent phase to a final concentration of 15 mM and the mixture was incubated with Ni-NTA agarose beads (Qiagen) for 1 h at  $4^{\circ}\text{C}$ . The beads were washed with 5 column volumes of Ras-NiNTA buffer A (20mM Tris pH 8.0, 100mM NaCl, 15mM imidazole pH 8.0, 10mM  $\beta$ ME and 0.5% Sodium Cholate) and the protein was eluted with 2 column volumes of Ras-NiNTA buffer B (20mM Tris pH 8.0, 100mM NaCl, 250mM imidazole pH 8.0, 10mM  $\beta$ ME and 0.5% Sodium Cholate). The protein was buffer exchanged to Ras-NiNTA buffer A using a 10,000 kDa MWCO Amicon concentrator, where protein was concentrated to ~1mL and topped up to 15 mL with Ras-NiNTA buffer A and this was repeated a total of 3 times. GTP $\gamma$ S was added in 2-fold molar excess relative to HRas along with 25 mM EDTA. After incubating for an hour at room temperature, the protein was buffer exchanged with phosphatase buffer (32 mM Tris pH 8.0, 200 mM Ammonium Sulfate, 0.1 mM ZnCl<sub>2</sub>, 10 mM  $\beta$ ME and 0.5% Sodium Cholate). 1 unit of immobilized calf alkaline phosphatase (Sigma) was added per milligram of HRas along with 2-fold excess nucleotide and the mixture was incubated for 1 h on ice. MgCl<sub>2</sub> was added to a final concentration of 30 mM to lock the bound nucleotide. The immobilized phosphatase was removed using a 0.22-micron spin filter (EMD Millipore). The protein was concentrated to less than 1 mL and was injected onto a Superdex 75 10/300 GL size exclusion column (GE Healthcare) equilibrated in gel filtration buffer (20 mM HEPES pH 7.7, 100 mM NaCl, 10 mM CHAPS, 1 mM MgCl<sub>2</sub> and 2 mM TCEP). The protein was concentrated to 1 mg/mL using a 10,000 kDa MWCO Amicon concentrator, aliquoted, snap-frozen in liquid nitrogen and stored at  $-80^{\circ}\text{C}$ .

### Expression and purification of complex of porcine p110 $\gamma$ with mouse p84 (X-Ray crystallography)

Constructs of full-length porcine p110 $\gamma$  were cloned into pVL1393 (Invitrogen). The plasmid for EE-tagged mouse p84 was a gift from Len Stephens (The Babraham Institute, UK). The constructs were transfected into *Spodoptera frugiperda* 9 (Sf9) insect cells with ExGen500 (Fermentas) and incubated at  $27^{\circ}\text{C}$  for 5 days to make baculoviruses. The heterodimeric p110 $\gamma$ -p84 complexes were obtained by co-infection of 3 L of Sf9 cells with p110 $\gamma$ -expressing and p84-expressing viruses. Cells were inoculated at a density of  $1 \times 10^7$  cells/mL and grown in 2L roller bottles standing vertically, with 500 mL of Sf9 cells per bottle. After 62 h incubation at  $27^{\circ}\text{C}$ , cells were harvested, washed in PBS, pelleted, snap-frozen in liquid nitrogen and stored at  $-80^{\circ}\text{C}$ .

### Purification of complex of porcine p110 $\gamma$ with mouse p84 (X-Ray crystallography)

Frozen cells were resuspended in sonication buffer (50mM TrisHCl pH 8, 100 mM NaCl, 1 mM PEFA, 25 mM imidazole) and lysed by sonication on ice at power 8 for 10 min (Sf9 cells). The lysates were ultracentrifuged at 35,000 rpm for 45 min at  $4^{\circ}\text{C}$  in Ti45 rotor. The soluble cell lysate was filtered through a 0.45  $\mu\text{m}$  filter. Subsequently, the lysate was passed over a 5 mL Ni-NTA Fast Flow column (GE Healthcare) that had been equilibrated with Ni wash buffer (20 mM Tris pH8, 1% Betaine, 0.1 M NaCl, 50 mM potassium phosphate pH 7, 0.05% Tween), washed with 15 mL of Ni wash buffer then eluted in a gradient from Ni A buffer (20 mM Tris pH 8, 300 mM NaCl, 25 mM imidazole) to Ni B (20 mM Tris pH 8, 300 mM NaCl, 500 mM imidazole). Fractions containing the p110-p84 complex were pooled and diluted 1:2 with QA buffer (50 mM Tris pH 8, 2 mM DTT). The diluted sample was loaded onto tandem HiTrap Q (5mL, GE Healthcare) and HiTrap Heparin (5 mL, GE Healthcare) columns that had been equilibrated in tandem with QA buffer. The protein was eluted from the tandem columns with a gradient of QA buffer to QB buffer (50 mM Tris pH 8, 1 M NaCl, 2 mM DTT). The eluted fractions containing the heterodimer were pooled and concentrated to 2 mL in a 50 kD MWCO Amicon Ultra concentrator (Millipore). The concentrated sample was then purified using a Superdex 200 (16/60) gel-filtration column with gel filtration buffer (20 mM Tris pH 7.5, 100 mM NaCl, 2 mM DTT). The fractions containing the heterodimer were pooled and concentrated to 10 mg/mL. One preparation from 3L of Sf9 cells yielded about 11 mg of purified, concentrated heterodimer.



### Purification of proteins for TIRF microscopy

#### Purification of recombinant farnesyl $G_{\beta 1}G_{\gamma 2}$ and SNAP- $G_{\beta 1}G_{\gamma 2}$

Proteins were expressed, purified, and labeled with Alexa 488 SNAP dye as previously described.<sup>32</sup>

#### Purification of HRas

The coding sequence for human HRas (1–189aa, Uniprot #P01112) was cloned into a pProEX vector to generate a his6-TEV-HRas fusion protein that lacked the last 5 amino acids (i.e.  $\Delta$ KCVLS\*). In addition, 2 solvent exposed cysteines (C118S and C181S) were mutated leaving a single reactive cysteine (C184), which was used for site-specific conjugation to MCC-PE lipids incorporated in supported lipid bilayers. This form of HRas has been used extensively to characterize GEF-mediated activation of Ras on supported membrane (Iversen et al. 2014). The his6-TEV-HRas fusion protein was expressed in BL21 (DE3) *E. coli*. Bacteria were initially grown at 37°C in Terrific Broth to an OD<sub>600</sub> of 0.8. Cultures were then shifted to 18°C for 1 h, induced with 0.1 mM IPTG, and allowed to express overnight for 20 h at 18°C before being harvested. Cells were lysed into 50 mM Na<sub>2</sub>HPO<sub>4</sub> [pH 8.0], 300 mM NaCl, 0.4 mM BME, 1 mM PMSF, 100  $\mu$ g/mL DNase using microtip sonication. Lysate was clarified by centrifugation at 16,000 rpm (35,172 x g) for 60 min in a Beckman JA-17 rotor chilled to 4°C. Lysate was circulated over 5 mL HiTrap Chelating column (GE Healthcare, Cat# 17-0409-01) charged with 100 mM CoCl<sub>2</sub>. Bound protein was eluted with a linear gradient of lysis buffer containing up to 500 mM imidazole [pH 8.0] (8 CV, 40 mL total, 2 mL/min flow rate). Peak fractions were pooled, combined with TEV protease (75  $\mu$ g/mL final concentration), and dialyzed against 4 L of buffer containing 50 mM Na<sub>2</sub>HPO<sub>4</sub> [pH 8.0], 300 mM NaCl, and 0.4 mM BME for 16–18 h at 4°C. Dialysate containing TEV protease cleaved his6-TEV-HRas was recirculated for 2 h over a 5 mL HiTrap Chelating column. Flow-through containing cleaved HRas was concentrated in a 10 kDa MWCO Amicon spin concentrator before being loaded on a 120 mL Superdex 75 (10/300 GL) gel filtration column equilibrated in 20 mM Tris [pH 8.0], 200 mM NaCl, 10% glycerol, 1 mM TCEP. Peak fractions were pooled and concentrated 400–500  $\mu$ M before snap freezing in liquid nitrogen. Note that absence of 10% glycerol in the storage buffer causes purified HRas to crystallize during spin concentration.

#### Purification and labeling of SNAP-RBD (Ras binding domain)

The Ras binding domain (RBD, 56–131aa) derived from human C-Raf kinase (Uniprot, #P04049) was cloned into a pETM-33 vector containing a gene sequence encoding his6-GST-3C-SNAP. Using site-directed mutagenesis, a K58E mutation was introduced into the RBD gene sequence to create a fast-cycling and high specificity Ras(GTP) binding protein as previously reported.<sup>57,58</sup> The his6-GST-3C-SNAP-RBD(K65E) fusion protein was expressed in BL21 (DE3) *E. coli*. Bacteria were initially grown at 37°C in Terrific Broth to an OD<sub>600</sub> of 0.8. Cultures were then shifted to 18°C for 1 h, induced with 0.1 mM IPTG, and allowed to express overnight for 20 h at 18°C before being harvested. Cells were lysed into 50 mM Na<sub>2</sub>HPO<sub>4</sub> [pH 8.0], 400 mM NaCl, 0.4 mM BME, 1 mM PMSF, 100  $\mu$ g/mL DNase using microtip sonication. Lysate was clarified by centrifugation at 16,000 rpm (35,172 x g) for 60 min in a Beckman JA-17 rotor chilled to 4°C. Lysate was circulated over 5 mL HiTrap Chelating column (GE Healthcare, Cat# 17-0409-01) charged with 100 mM CoCl<sub>2</sub>. Bound protein was eluted with a linear gradient of lysis buffer containing up to 500 mM imidazole [pH 8.0] (8 CV, 40 mL total, 2 mL/min flow rate). Peak fractions were pooled, combined with 0.1 mg/mL prescission protease, and dialyzed against 4 L of buffer containing 20 mM HEPES [pH 7], 400 mM NaCl, 5% glycerol, and 0.4 mM BME for 16–18 h at 4°C. Dialysate containing prescission protease cleaved his6-GST-3C-SNAP-RBD(K65E) was recirculated for 2 h over a 5 mL HiTrap Chelating column. Flow-through containing cleaved SNAP-RBD(K65E) was concentrated in a 10 kDa MWCO Amicon spin concentrator before being loaded on a 120 mL Superdex 75 (10/300 GL) gel filtration column equilibrated in 20 mM HEPES [pH 7], 200 mM NaCl, 10% glycerol, 1 mM TCEP. Peak fractions were pooled and concentrated  $\sim$ 100  $\mu$ M before snap freezing in liquid nitrogen and storing in the  $-80^{\circ}\text{C}$ .

To fluorescently label SNAP-RBD(K65E), we combined 1 mL of 20  $\mu$ M protein with 25  $\mu$ M Alexa 546-SNAP surface dye (New England Biolabs, Cat# S9132S). SNAP dye labeling was performed in buffer containing 20 mM HEPES [pH 7], 200 mM NaCl, 10% glycerol, 1 mM TCEP overnight at 4°C. Labeled protein was then separated from free Alexa 546-SNAP dye using a 5 kDa MWCO Amicon spin concentrator followed by size exclusion chromatography (i.e. Superdex 75 10/300 GL). Peak SEC fractions containing Alexa 546-SNAP-RBD(K65E) were pooled and centrifuged in a 5 kDa MWCO Amicon spin concentrator to reach a final concentration of 20  $\mu$ M before snap freezing in liquid nitrogen and storing in the  $-80^{\circ}\text{C}$ . To calculate the SNAP dye labeling efficiency, we determined that Alexa 546 contributes 10% of the peak A<sub>550</sub> signal to the measured A<sub>280</sub>. We calculate the final concentration of Alexa 546-SNAP-RBD(K65E) using an adjusted A<sub>280</sub> (i.e.  $A_{280(\text{protein})} = A_{280(\text{observed})} - A_{550(\text{dye})} * 0.10$ ) and the following extinction coefficients:  $\epsilon_{280(\text{SNAP-RBD})} = 26,470 \text{ M}^{-1} \text{ cm}^{-1}$ ,  $\epsilon_{650(\text{Alexa 546})} = 104,000 \text{ M}^{-1} \text{ cm}^{-1}$ .

#### Fluorescent labeling of ybbr-p84-p110 $\gamma$ and ybbr-p101-p110 $\gamma$

We generated a Dyomics647-CoA conjugate in-house by combining 15 mM Dyomics647 maleimide (Dyomics, Cat #647P1-03) in DMSO with 10 mM CoA (Sigma, #C3019, MW = 785.33 g/mol) dissolved in 1x PBS. This mixture was incubated overnight at 23°C. Unreacted Dyomics647 maleimide was quenched by the addition of 5 mM DTT. We labeled recombinant ybbr-p84-p110 $\gamma$  and ybbr-p101-p110 $\gamma$  containing an N-terminal ybbrR13 motif (DSLEFIASKLA) using Sfp transferase and DY647-CoA.<sup>59,60</sup> Chemical labeling was achieved by combining 5  $\mu$ M ybbr-tagged PI3K complexes, 4  $\mu$ M Sfp-his<sub>6</sub>, and 10  $\mu$ M DY647-CoA, in 2 mL of buffer containing 20 mM Tris [pH 8], 150 mM NaCl, 10 mM MgCl<sub>2</sub>, 10% Glycerol, 1 mM TCEP, 0.05% CHAPS. Following a 4-h labeling reaction on ice, excess DY647-CoA was removed using a PD-10 desalting column. The DY647-ybbr-p84-p110 $\gamma$  and DY647-ybbr-p101-p110 $\gamma$  was concentrate in a 50 kDa MWCO Amicon centrifuge tube and loaded on a Superdex 200 gel filtration column equilibrated in 20 mM Tris [pH 8], 150 mM NaCl, 10% glycerol, 1 mM TCEP, 0.05% CHAPS. Peak fractions were pooled and concentrated to 2–5  $\mu$ M before flash freezing in liquid nitrogen and storing in the  $-80^{\circ}\text{C}$ . We calculated the final concentration of DY647-labeled

PI3K complexes using an adjusted  $A_{280}$  (i.e.  $A_{280(\text{protein})} = A_{280(\text{observed})} - A_{650(\text{dye})} * 0.06$ ) and the following extinction coefficients:  $\epsilon_{280(\text{p101-p110}\gamma)} = 250,730 \text{ M}^{-1} \text{ cm}^{-1}$ ,  $\epsilon_{280(\text{p84-p110}\gamma)} = 233,730 \text{ M}^{-1} \text{ cm}^{-1}$ ,  $\epsilon_{650(\text{DY647})} = 220,000 \text{ M}^{-1} \text{ cm}^{-1}$ .

#### Preparation of supported lipid bilayers

The following lipids were used to generate small unilamellar vesicles (SUVs) and subsequently supported lipid bilayers: 1,2-dioleoyl-sn-glycero-3-phosphocholine (18:1 DOPC, Avanti #850375C), L- $\alpha$ -phosphatidylinositol-4,5-bisphosphate (Brain PI(4,5)P<sub>2</sub>, Avanti #840046X), 1,2-dioleoyl-sn-glycero-3-phosphoethanolamine-N-[4-(p-maleimidomethyl)cyclohexane-carboxamide] (18:1 MCC-PE, Avanti #780201C). To make liposomes, 2  $\mu\text{mol}$  total lipids are combined in a 35 mL glass round bottom flask containing 2 mL of chloroform. Lipids are dried to a thin film using rotary evaporation with the glass round-bottom flask submerged in a 42°C water bath. After evaporating all the chloroform, the round bottom flask was flushed with nitrogen gas for at least 30 min. Resuspend lipid film in 2 mL of PBS [pH 7.2], making a final concentration of 1 mM total lipids. All lipid mixtures expressed as percentages are equivalent to molar fractions. To generate 50 nm SUVs, 1 mM total lipid mixtures were extruded through a 0.05  $\mu\text{m}$  pore size 19 mm polycarbonate membrane (Sigma, #WHA800308) with filter supports (Avanti #610014) on both sides of the PC membrane.

Supported lipid bilayers are formed on 25 x 75 mm coverglass (IBIDI, #10812). Coverglass was first cleaned with 2% Hellmanex III (Fisher, Cat# 14-385-864) heated to 60–70°C in a glass coplin jar. Incubate for at least 30 min. Wash coverglass extensively with MilliQ water and then etched with Piranha solution (1:3, hydrogen peroxide:sulfuric acid) for 10–15 min the same day SLBs were formed. Etched coverglass, in water, is rapidly dried with nitrogen gas before adhering to a 6-well sticky-side chamber (IBIDI, Cat# 80608). Form SLBs by flowing 30 nm SUVs diluted in PBS [pH 7.2] to a total lipid concentration of 0.25 mM (i.e. 1:4 dilution of extruded lipids). After 30 min, IBIDI chambers are washed with 5 mL of PBS [pH 7.2] to remove non-absorbed SUVs. Membrane defects are blocked for 5–10 min with a 1 mg/mL beta casein (Thermo FisherSci, Cat# 37528) diluted in 1x PBS [pH 7.4]. Before use as a blocking protein, frozen 10 mg/mL beta casein stocks were thawed, centrifuged for 30 min at 21370 x g, and 0.22  $\mu\text{m}$  syringe filtered. After blocking SLBs with beta casein, membranes were washed with 2 mL of PBS, followed by 1 mL of TIRF-M imaging buffer.

Supported membrane containing with MCC-PE lipids were used to covalently couple HRas(GDP). For these SLBs, 100  $\mu\text{L}$  of 30  $\mu\text{M}$  HRas diluted in a 1x PBS [pH 7.4] and 0.1 mM TCEP buffer was added to the IBIDI chamber and incubated for 2 h at 23°C. The addition of TCEP significantly increases the coupling efficiency. SLBs with MCC-PE lipids were then washed with 2 mL of 1x PBS [pH 7.4] containing 5 mM beta-mercaptoethanol (BME) and incubated for 15 min to neutralize the unreacted maleimide headgroups. SLBs were washed with 1 mL of 1x PBS, followed by 1 mL of kinase buffer before starting smTIRF-M experiments.

#### Activation of HRas on supported lipid bilayers

Membrane conjugated HRas(GDP) was converted to HRas (GTP) using either chemical activation (i.e. EDTA/GTP/MgCl<sub>2</sub>) or with a guanine nucleotide exchange factor (GEF). Chemical activation was achieved by first washing supported membranes containing maleimide conjugated HRas (GDP) with buffer containing 1x PBS, 1 mM EDTA, 1 mM GTP. This was followed by a 15-min incubation to exchange GDP for GTP. To stably associate the newly loaded GTP with HRas, chambers containing the SLBs were subsequently washed with 1x PBS, 1 mM MgCl<sub>2</sub>, 50  $\mu\text{M}$  GTP. A complementary approach that utilizes GEF-mediated activation of H-Ras was achieved by flowing 50 nM Sos1 catalytic domain over HRas (GDP) conjugated membranes. The mechanism of activation was carried out in buffer containing 1x PBS, 1 mM MgCl<sub>2</sub>, 50  $\mu\text{M}$  GTP. Both methods of activation yielded the same density of HRas (GTP) and have been validated in previous studies. Efficient activation of membrane tethered HRas was assessed by visualizing the nucleotide dependent localization of SNAP Alexa 546 labeled Ras binding domain (Ax546-RBD) derived from c-Raf kinase using TIRF microscopy (Figures S5A-S5C). The experimental data shown in Figure 5 was collected under conditions that utilized chemical activation of HRas.

#### Quantification of supported membrane localization

In the presence HRas(GDP), we detected no membrane binding events for either DY647-p101-p110 $\gamma$  and DY647-p84-p110 $\gamma$ . This condition served as a negative control for determining the background level of fluorescence for bulk membrane absorption experiments shown in Figures 5B-5C. The average membrane fluorescence intensity measured by TIRF-M in the presence of HRas(GDP) was subtracted from data collected in the presence of membrane tethered HRas(GTP) and/or G $\beta\gamma$  to yield the plots in Figures 5B-5C.

#### Single molecule TIRF microscopy experiments

All smTIRF-M experiments were performed on an inverted Nikon Ti2 microscope using a 100x Nikon objective (1.49 NA) oil immersion TIRF objective. The x axis and y axis positions were controlled using a Nikon motorized stage. Fluorescently labeled proteins were excited with either a 488, 561, or 637 nm diode lasers (OBIS laser diode, Coherent Inc. Santa Clara, CA) controlled by a Vortran laser drive with acousto-optic tunable filters (AOTF). The power output measured through the objective for single particle imaging was 1–3 mW. Excitation light passing through quad multi-pass dichroic filter cube (Semrock). Fluorescence emission passed through Nikon emission filter wheel containing the following 25 mm emission filters: ET525/50M, ET600/50M, ET700/75M (Semrock) and then detected using an iXion Life 897 EMCCD camera (Andor Technology Ltd., UK). All experiments smTIRF-M were performed at room temperature (23°C). Microscope hardware was controlled using Nikon NIS elements.

All smTIRF-M experiments were performed on supported membrane used the following imaging buffer: 20 mM HEPES [pH 7.0], 150 mM NaCl, 50  $\mu\text{M}$  GTP, 1 mM ATP, 5 mM MgCl<sub>2</sub>, 0.5 mM EGTA, 20 mM glucose, 200  $\mu\text{g/mL}$  beta casein (ThermoScientific, Cat# 37528), 20 mM BME, 320  $\mu\text{g/mL}$  glucose oxidase (Biophoretics, Cat# B01357.02), 50  $\mu\text{g/mL}$  catalase (Sigma, #C40-100MG Bovine Liver), and 2 mM Trolox (Cayman Chemical, Cat#10011659).<sup>61</sup> Perishable reagents (i.e. glucose oxidase, catalase, and Trolox) were added 5–10 min before image acquisition.

### Alphafold2 modeling

We utilized the AlphaFold2 using Mmseqs2 notebook of ColabFold at [colab.research.google.com/github/sokrypton/ColabFold/blob/main/AlphaFold2.ipynb](https://colab.research.google.com/github/sokrypton/ColabFold/blob/main/AlphaFold2.ipynb)<sup>62</sup> to make structural predictions of p110 $\gamma$  bound to p84, p101 bound to G $\beta\gamma$ , and p110 $\gamma$  bound to G $\beta\gamma$ . The pLDDT confidence values consistently scored above 90% for all models, with the predicted aligned error and pLDDT scores for all models are shown in [Figures S1, S6, S7](#). The best models for G $\beta\gamma$  bound to the helical domain of p110 $\gamma$  and the C-terminal domain of p101 are included as PDB files in the source data.

### Crystallization of porcine p110 $\gamma$ /mouse p84

For initial screens, 100 nL drops of purified, concentrated heterodimer at 10 mg/mL were dispensed into LMB 96-well plates with 100 nL of reservoir solution. The initial screen was the 2000 condition LMB screen,<sup>63,64</sup> containing a wide range of crystallisation solutions, using an Innovadyne crystallisation robot. The plates were stored at 17°C. To improve initial crystals, 1  $\mu$ L drops of protein and 1  $\mu$ L drops of well solution were manually pipetted into 24 well plates (either sitting drop or hanging drop). Seeding from the existing crystals into the fresh drop was performed using a Hampton seeding tool. The plates were then stored at 17°C or 4°C. Crystals were initially obtained from a Morpheus screen.<sup>65</sup> Optimized crystals were grown from a crystallization solution containing 16% EDO\_P8K (20% w/v PEG 8000, 40% v/v ethylene glycol), 0.06 M amino acids (0.2 M sodium L-glutamate, 0.2 M DL-alanine, 0.2 M glycine, 0.2 M DL-lysine, 0.2 M DL-serine), 0.08 M buffer 2 pH7.5 (0.5 M HEPES, 0.5 M MOPS), 0.4 M Na/K phosphate pH 6.3. Crystals were 120  $\mu$ m  $\times$  50  $\mu$ m  $\times$  10  $\mu$ m plates that diffracted to 8 Å resolution ([Table S1](#)).

### X-Ray data collection/refinement for complex of porcine p110 $\gamma$ with mouse p84

Diffraction data collected with remote control at ESRF beamline ID29, using a wavelength of 0.9762. Images were integrated with MOSFLM<sup>66</sup> and scaled with SCALA.<sup>67</sup> Molecular replacement and refinement were carried out using PHASER<sup>68</sup> and Phenix.refine.<sup>69</sup> For molecular replacement a model of the p110 $\gamma$ -p84 complex was generated in COOT<sup>70</sup> from a composite of the alphafold2 model of the p110 $\gamma$  C2 domain and RBD-C2 and C2-helical linkers bound to full length p84 with the rest of the *Sus scrofa* p110 $\gamma$  subunit assembled from an alphafold generated model templated on the human p110 $\gamma$  from the PDB entry 7MEZ.<sup>32</sup> There were four heterodimers per asymmetric unit. The entire assembly was then subjected to rigid-body, xyz reciprocal space, and group B-factor refinement in phenix-refine<sup>69</sup> using NCS and secondary structure restraints. Due to the low resolution, no manual adjustments were made in the model. Statistics for the final model are shown in [Table S1](#).

### Negative stain electron microscopy

Purified human p110 $\gamma$ -mouse p84 was adsorbed to glow discharged carbon coated grids at a concentration of 0.02 mg/mL for 5s and stained with uranyl formate. The stained specimen was examined using a Tecnai Spirit transmission electron microscope (ThermoFisher Scientific) operated at an accelerating voltage of 120 kV and equipped with an FEI Eagle 4K charged-coupled-device (CCD) camera. 50 micrographs were acquired at a nominal magnification of 49,000x at a defocus of  $-1.2$ mm and binned twice to obtain a final pixel size of 4.67 Å/pixel. The contrast transfer function (CTF) of each micrograph was estimated using CTFind4.1 within Relion 3.0.8. 200 particles were manually picked then aligned to generate 2D class averages for template-based autopicking. These templates were then used to autopick 20,610 particles which were extracted with a box size of 336 Å. Particles were then exported to cryoSPARC v2.14.2 for 2D classification and 10,344 particles which classified to “good” classes were selected and subjected to *ab initio* reconstruction with a max alignment resolution of 12 Å. The same particles were then used for homogeneous refinement of the *ab initio* model, yielding the final map at 19 Å resolution, as calculated by the gold standard Fourier Shell Correlation (FSC) at 0.143 cutoff.

### Lipid vesicle preparation for kinase activity assays

Lipid vesicles for HDX-MS and bulk kinase assays were prepared by mixing the lipids solutions in organic solvent. The solvent was evaporated in a stream of argon following which the lipid film was desiccated in a vacuum for 45 min. The lipids were resuspended in lipid buffer (20 mM HEPES pH 7.0, 100 mM NaCl and 10% glycerol) at a concentration of 5 mg/mL and the solution was bath sonicated for 15 min. The vesicles were subjected to five freeze thaw cycles and extruded 11 times through a 100-nm filter (T&T Scientific: TT-002-0010). The extruded vesicles were aliquoted and stored at  $-80^{\circ}$ C.

### Kinase assays

All kinase assays were done using Transcreener ADP2 Fluorescence Intensity (FI) assays (Bellbrook labs) which measures ADP production. PM-mimic vesicles [5% phosphatidylinositol 4,5-bisphosphate (PIP<sub>2</sub>), 20% phosphatidylserine (PS), 10% phosphatidylcholine (PC), 35% phosphatidylethanolamine (PE), 25% cholesterol, 5% sphingomyelin (SM)] were at a final concentration of 0.5 mg/mL, ATP at a final concentration of 100  $\mu$ M and HRas at final concentrations ranging from 10 nM to 1.5  $\mu$ M were used. For assays measuring co-stimulation with G $\beta\gamma$ , 1.5  $\mu$ M of the activator was used in the reaction. Final concentration of kinase ranged from 400 nM to 2000 nM for both p110 $\gamma$ -p101 and p110 $\gamma$ -p84. For conditions with G $\beta\gamma$ , final kinase concentrations of kinase ranged from 100 nM to 400 nM for p110 $\gamma$ -p84 and from 3 nM to 10 nM for p110 $\gamma$ -p101. Assays comparing the activation of p110 $\gamma$ -p101, the loop swap mutant, and p110 $\gamma$ -p84 by G $\beta\gamma$  ([Figure 6G](#)) used lipid vesicles containing 5% PIP<sub>2</sub>, 65% phosphatidylethanolamine (PE), and 30% phosphatidylserine (PS) at a final concentration of 0.75 mg/mL, ATP at a final concentration of 100  $\mu$ M, and 100 nM G $\beta\gamma$ . Kinase was present at concentrations ranging from 17 to 400 nM.

2  $\mu$ L of 2X substrate solution containing vesicles, the appropriate concentration of Ras and G $\beta\gamma$  (for conditions assaying co-stimulation) was mixed with 2  $\mu$ L of 2X kinase solution and the reaction was allowed to proceed for 60 min. The reactions were stopped with 4  $\mu$ L of 2X stop and detect solution containing Stop and Detect buffer, 8 nM ADP Alexa Fluor 594 Tracer and 93.7  $\mu$ g/mL ADP2 Antibody IRDye QC-1 and incubated for 50 min. The fluorescence intensity was measured using a SpectraMax M5 plate reader at

excitation 590 nm and emission 620 nm. The % ATP turnover was interpolated from a standard curve (0.1–100  $\mu$ M ADP) using Graph-pad prism, with these values converted into specific activity based on the concentration of protein.

#### Hydrogen deuterium eXchange mass spectrometry- activators

Exchange reactions were carried out at 18°C in 12  $\mu$ L volumes with final concentrations of 1.5  $\mu$ M, 3  $\mu$ M, 3  $\mu$ M for p110 $\gamma$ -p84, HRas (G12V) and G $\beta\gamma$  respectively. A total of five conditions were assessed: p110 $\gamma$ -p84, p110 $\gamma$ -p84 + HRas (G12V), p110 $\gamma$ -p84 + G $\beta\gamma$ , and p110 $\gamma$ -p84 + HRas(G12V) + G $\beta\gamma$ . All conditions were in the presence of PM mimic membranes [5%PIP<sub>2</sub>, 20% phosphatidylserine (PS), 10% phosphatidylcholine (PC), 35% phosphatidylethanolamine (PE), 25% cholesterol, 5% sphingomyelin (SM)] at a final concentration of 0.42 mg/mL. Mixtures of lipid vesicles and activators (HRas(G12V)/G $\beta\gamma$ ) were prepared by combining 1  $\mu$ L of lipid vesicles or vesicle buffer (25mM HEPES 7.0, 100mM NaCl, 10% glycerol) with 0.85  $\mu$ L of HRas(G12V) or HRas buffer (20mM HEPES pH 7.7, 100mM NaCl, 10mM CHAPS, 2mM TCEP), and 0.63  $\mu$ L of G $\beta\gamma$  or G $\beta\gamma$  buffer (20mM HEPES pH 7.7, 100mM NaCl, 8mM CHAPS, 2mM TCEP). Prior to the addition of D<sub>2</sub>O, 1.2  $\mu$ L of p110 $\gamma$ -p84 was added to the lipid-activator mixture, and the solution was left to incubate at 18°C for 2 min. The hydrogen-deuterium exchange reaction was initiated by the addition of 8.32  $\mu$ L D<sub>2</sub>O buffer (94.3% D<sub>2</sub>O, 100 mM NaCl, 20 mM HEPES pH 7.5) to the 3.68  $\mu$ L protein or protein-lipid solutions for a final D<sub>2</sub>O concentration of 65.5%. Exchange was carried out over four time points (3s, 30s, 300s, 3000s) and terminated by the addition of 60  $\mu$ L ice-cold acidic quench buffer (0.6 M guanidine-HCl, 0.9% formic acid final).

#### Hydrogen deuterium eXchange mass spectrometry- regulators

Exchange reactions were carried out at 18°C in 50  $\mu$ L volumes with final concentrations of 0.4  $\mu$ M, human p110 $\gamma$ /mouse p84 or human p110 $\gamma$ /porcine p101. The hydrogen-deuterium exchange reaction was initiated by the addition of 48.6  $\mu$ L D<sub>2</sub>O buffer (94.3% D<sub>2</sub>O, 100 mM NaCl, 20 mM HEPES pH 7.5) to the 1.4  $\mu$ L protein solutions for a final D<sub>2</sub>O concentration of 91.7%. Exchange was carried out over five time points (3s, 30s, 300s, 3000 s at 18°C and 3s at 4°C) and terminated by the addition of 20  $\mu$ L ice-cold acidic quench buffer (0.6 M guanidine-HCl, 0.9% formic acid final).

#### Hydrogen deuterium eXchange mass spectrometry-human regulators

Exchange reactions were carried out at 18°C in either 6  $\mu$ L (high concentration) or 50  $\mu$ L (low concentration) volumes with final concentrations of 1.5  $\mu$ M (high) or 0.175  $\mu$ M (low) human p110 $\gamma$ /mouse p84 or human p110 $\gamma$ /porcine p101. The hydrogen-deuterium exchange reaction was initiated by the addition of 3  $\mu$ L or 25  $\mu$ L D<sub>2</sub>O buffer (94.3% D<sub>2</sub>O, 100 mM NaCl, 20 mM HEPES pH 7.5) to the 3  $\mu$ L or 25  $\mu$ L protein solutions for a final D<sub>2</sub>O concentration of 47.2%. Exchange was carried out over two time points (30s, 300 s at 18°C) and terminated by the addition of 64  $\mu$ L or 20  $\mu$ L ice-cold acidic quench buffer (0.6 M guanidine-HCl, 0.9% formic acid final).

#### Protein digestion and MS/MS data collection

Protein samples were rapidly thawed and injected onto an integrated fluidics system containing a HDx-3 PAL liquid handling robot and climate-controlled chromatography system (LEAP Technologies), a Dionex Ultimate 3000 UHPLC system, as well as an Impact HD QTOF Mass spectrometer (Bruker). The protein was run over two immobilized pepsin columns (Applied Biosystems; Poroszyme™ Immobilized Pepsin Cartridge, 2.1 mm  $\times$  30 mm; Thermo-Fisher 2-3131-00; at 10°C and 2°C respectively), or for the high low human regulator HDX over one immobilized Nepenthesin-2 column from Affipro (AP-PC-004), at 200  $\mu$ L/min for 3 min. The resulting peptides were collected and desalted on a C18 trap column [Acquity UPLC BEH C18 1.7 mm column (2.1  $\times$  5 mm); Waters 186003975]. The trap was subsequently eluted in line with an ACQUITY 1.7  $\mu$ m particle, 100  $\times$  1 mm<sup>2</sup> C18 UPLC column (Waters 186002352), using a gradient of 3–35% B (buffer A, 0.1% formic acid; buffer B, 100% acetonitrile) over 11 min immediately followed by a gradient of 35–80% B over 5 min. MS experiments acquired over a mass range from 150 to 2200 mass/charge ratio (m/z) using an electrospray ionization source operated at a temperature of 200°C and a spray voltage of 4.5 kV.

#### Peptide identification

Peptides were identified using data-dependent acquisition following tandem MS/MS experiments (0.5 s precursor scan from 150 to 2000 m/z; twelve 0.25 s fragment scans from 150 to 2000 m/z). MS/MS datasets were analyzed using PEAKS7 (PEAKS), and a false discovery rate was set at 0.1% using a database of purified proteins and known contaminants.<sup>71</sup> The search parameters were set with a precursor tolerance of 20 parts per million, fragment mass error 0.02 Da, and charge states 1–8.

## QUANTIFICATION AND STATISTICAL ANALYSIS

#### Single particle tracking

Particle detection and tracking of DY647-p101-p110 $\gamma$  and DY647-p84-p110 $\gamma$  was performed using the ImageJ/Fiji TrackMate plugin.<sup>72</sup> Image stacks were loaded into ImageJ/Fiji as .nd2 files and cropped to 400  $\times$  400 pixels to minimize differences in field illumination caused by TIRF illumination. Using the LoG detector option, particles were identified based on brightness and their signal-to-noise ratio. Working with dimension in pixels, particles with a “blob” diameter of 6 pixels were identified. After identifying the position of all fluorescent particles, we used the LAP tracker to generate particle trajectories that monitor molecular displacement as a function of time. Particle trajectories were filtered based on the following parameters: Track Start (removed trajectories that began in first frame), Track End (removed trajectories present in last frame), Duration ( $\leq$  2 frames), Track displacement (removed immobilized particles), and X – Y location (removed particles on the edge of the images). Our filtering parameters removed 1–5% of particle trajectories that were either immobilized or displayed fluorescence brightness that was either too bright or dim compared



to the mean particle intensity. The TrackMate output files were analyzed using Prism 9 to calculate the single molecule dwell times and diffusion coefficients.

For all analysis presented in this manuscript, the bin size for the step size distribution equals 0.01  $\mu\text{m}$ . For curving fitting, the step-size distributions were plotted as probability density versus step size ( $\mu\text{m}$ ). Probability density was calculated by dividing the frequency by a bin size of 0.01  $\mu\text{m}$ . The probability density versus step size plots were fit to the following one- or two-species distribution models:

### Single species model

$$f(r) = \frac{r}{2D\tau} e^{-\left(\frac{r^2}{4D\tau}\right)}$$

### Two species model

$$f(r) = \alpha \frac{r}{2D_1\tau} e^{-\left(\frac{r^2}{4D_1\tau}\right)} + (1 - \alpha) \frac{r}{2D_2\tau} e^{-\left(\frac{r^2}{4D_2\tau}\right)}$$

Variables are defined as the  $D_1$  = diffusion coefficient species 1 ( $\mu\text{m}^2/\text{s}$ ),  $D_2$  = diffusion coefficient species 2 ( $\mu\text{m}^2/\text{s}$ ),  $\alpha$  ( $\alpha$  = % of species 1),  $r$  = step size ( $\mu\text{m}$ ),  $\tau$  = time interval between steps in seconds. The final step size distribution plots were fit in Prism graphing software using the following equations:  $f(r) = x/(2*D1*t)*\exp(-(x^2/(4*D1*t)))$  for a 1 species model,  $f(r) = \alpha*(x/(2*D1*t))*\exp(-(x^2/(4*D1*t)))+(1-\alpha)*(x/(2*D2*t))*\exp(-(x^2/(4*D2*t)))$  for a 2 species model.

To calculate the single molecule dwell times for DY647-p101-p110 $\gamma$  and DY647-p84-p110 $\gamma$  we generated a cumulative distribution frequency (CDF) plot using the frame interval as the bin size (e.g. 50 ms). After plotting the  $\log_{10}(1-\text{CDF})$  as a function of dwell time the data was fit to either a single or double exponential decay curve. See [Figures S5D-S5G](#) for an example of our data processing.

### Single exponential model

$$f(x) = e^{-x/\tau_1}$$

### Two exponential model

$$f(x) = \alpha * e^{-x/\tau_1} + (1 - \alpha) * e^{-x/\tau_2}$$

Fitting procedure initiated with a single exponential. In cases of a low-quality single exponential fit, a maximum of two species model was used. For double exponential fit,  $\alpha$  ( $\alpha$ ) represents the fraction of fast dissociating molecules characterized by the exponential decay time constant,  $\tau_1$ .

### Mass analysis of peptide centroids and measurement of deuterium incorporation for HDX-MS experiments

HD-Examiner Software (Sierra Analytics) was used to automatically calculate the level of deuterium incorporation into each peptide. All peptides were manually inspected for correct charge state, correct retention time, and appropriate selection of isotopic distribution. Deuteration levels were calculated using the centroid of the experimental isotope clusters. HDX-MS results are presented with no correction for back exchange shown in the Source data, with the only correction being applied correcting for the deuterium oxide percentage of the buffer used in the exchange. Changes in any peptide at any time point greater than specified cut-offs (5% and 0.3 Da, or 7% and 0.5Da for human regulator HDX) and with an unpaired, two-tailed t test value of  $p < 0.01$  was considered significant.

The raw peptide deuterium incorporation graphs for a selection of peptides with significant differences are shown, with the raw data for all analyzed peptides in the source data. To allow for visualization of differences across all peptides, we utilized number of deuterium difference (#D) plots. These plots show the total difference in deuterium incorporation over the entire H/D exchange time course, with each point indicating a single peptide. These graphs are calculated by summing the differences at every time point for each peptide and propagating the error (example [Figures 2E, 4A-4C](#)). For a selection of peptides we are showing the %D incorporation over a time course, which allows for comparison of multiple conditions at the same time for a given region ([Figure S4](#)). Samples were only compared within a single experiment and were never compared to experiments completed at a different time with a different final  $\text{D}_2\text{O}$  level. The data analysis statistics for all HDX-MS experiments are in [Table S2](#) according to the guidelines of.<sup>73</sup> The mass spectrometry proteomics data have been deposited to the ProteomeXchange Consortium via the PRIDE partner repository with identifier PXD035723.<sup>1</sup>

Cell Reports, Volume 42

## Supplemental information

**Molecular basis for differential activation**

**of p101 and p84 complexes**

**of PI3K $\gamma$  by Ras and GPCRs**

**Manoj K. Rathinaswamy, Meredith L. Jenkins, Benjamin R. Duewell, Xuxiao Zhang, Noah J. Harris, John T. Evans, Jordan T.B. Stariha, Udit Dalwadi, Kaelin D. Fleming, Harish Ranga-Prasad, Calvin K. Yip, Roger L. Williams, Scott D. Hansen, and John E. Burke**

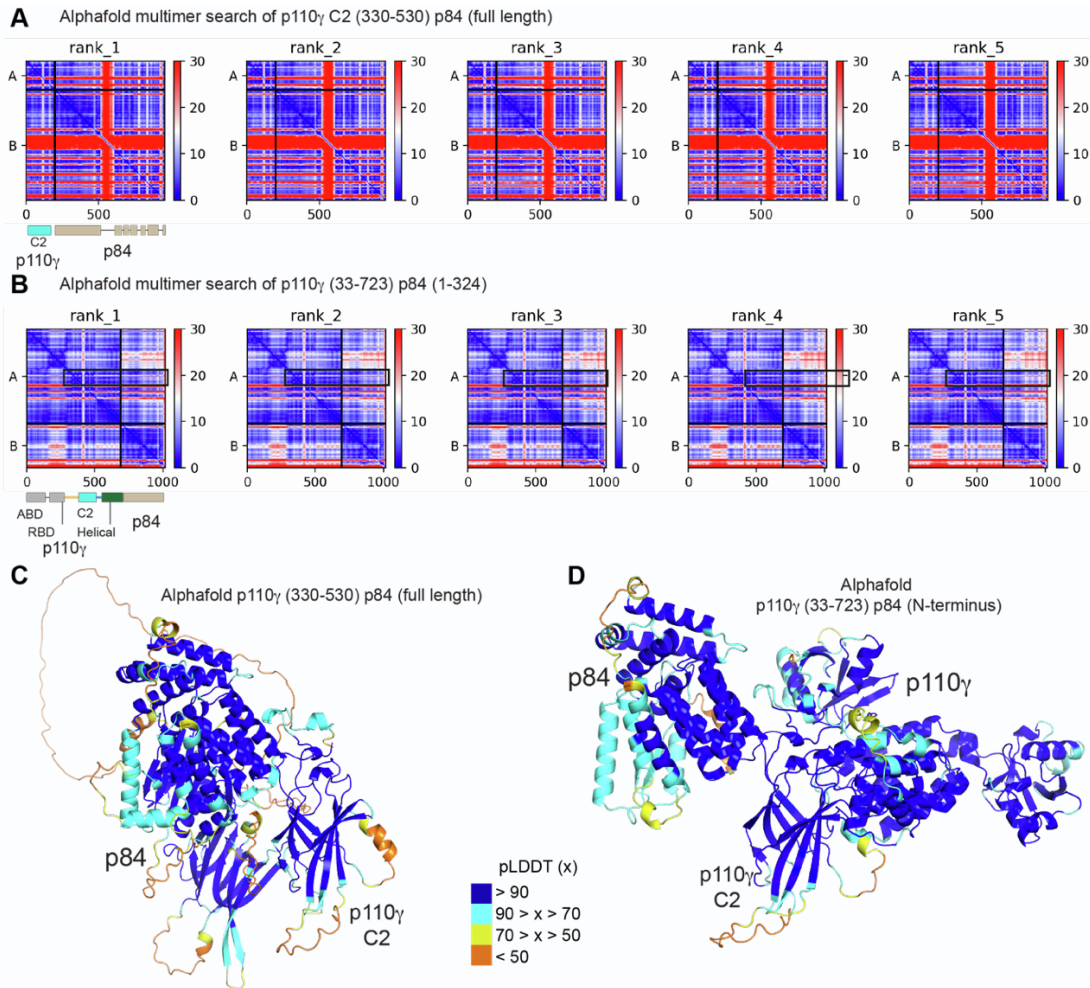

**Fig S1. AlphaFold2-multimer modelling of the p110 $\gamma$ -p84 complex (related to Fig 1).**

**A.** Predicted aligned error (PAE) for AlphaFold2 Multimer search of the p110 $\gamma$  C2 domain and RBD-C2 and C2-helical linkers bound to full length p84. The sequence of the two searches are indicated, with a schematic indicated below.

**B.** Predicted aligned error (PAE) for AlphaFold2 Multimer search of the N-terminus of p110 $\gamma$  (33-723 covering the ABD, RBD, C2, and helical domains) and the N-terminus (1-324) of p84. The sequence of the two searches are indicated, with a schematic indicated below. For both panels **A+B**, the colours indicate the predicted aligned error, and are coloured according to the legend. Note that the PAE plot is not an inter-residue distance map or a contact map. Instead, the red-blue colour indicates expected distance error. The colour at (x, y) corresponds to the expected distance error in residue x's position, when the prediction are aligned on residue y (more information can be found at <https://alphafold.ebi.ac.uk/>)<sup>1,2</sup>. Blue is indicative of low PAE, with the low PAE at the p110 $\gamma$ -p84 interface in both panels **A+B** suggests that AlphaFold2-multimer predicts the relative positions of the catalytic and regulatory subunits with high accuracy.

**C+D.** AlphaFold2 models from panels **A+B** shown with the per-residue confidence metric predicted local-distance difference test (pLDDT) coloured according to the legend. The pLDDT score varies from 0 to 100,

17 and is an estimate of how well the prediction would agree with an experimental structure based on the local  
18 distance difference test  $C\alpha$  <sup>1</sup>.  
19

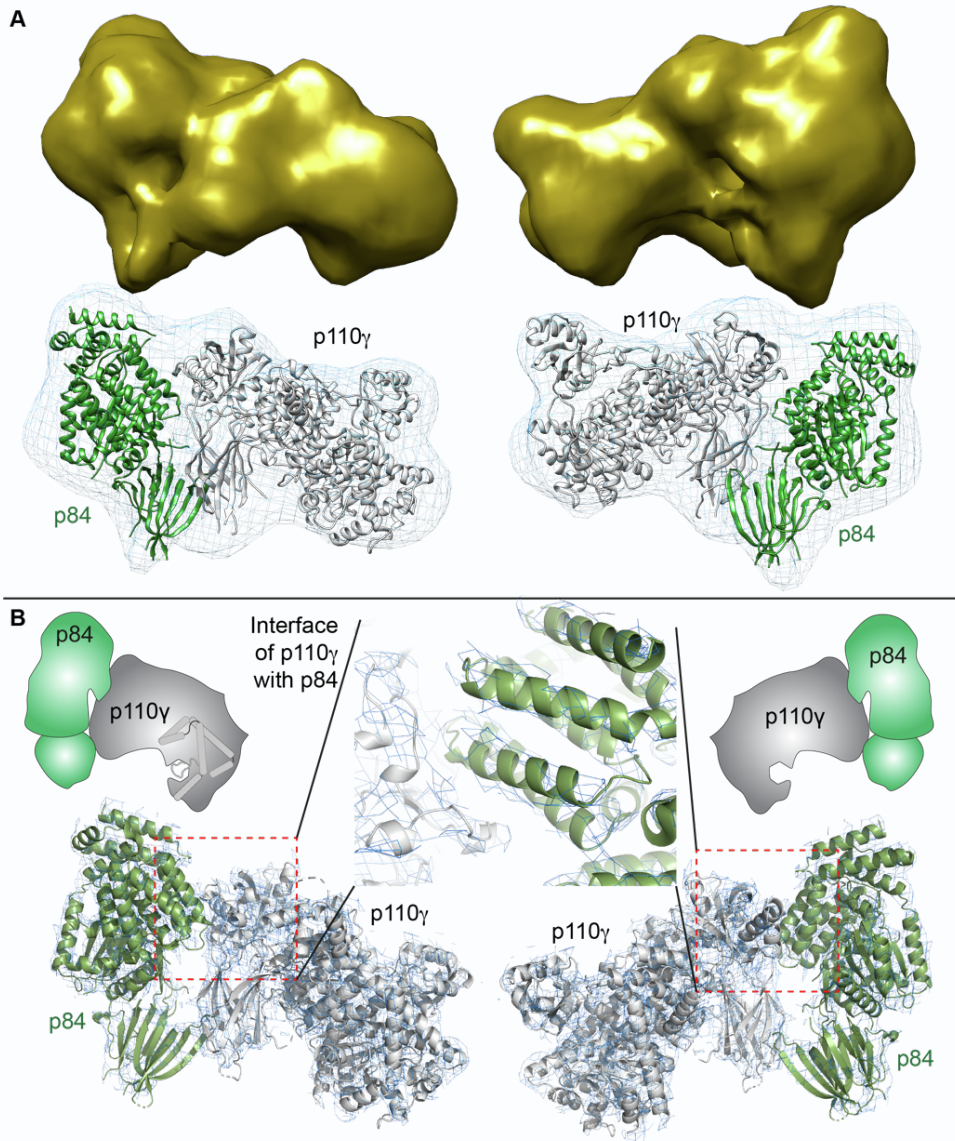

20  
21 **Fig S2. EM and X-ray validation of the alphafold2-multimer model of the p110 $\gamma$ -p84 complex (related**  
22 **to Fig 1).**

23 **A.** 3D EM reconstruction of p110 $\gamma$  with different orientations of the complex. A cartoon representation of  
24 the p110 $\gamma$ -p84 complex is shown in the density map in the same orientation as above.

25 **B.** The 2mFo-DFc electron density (contoured at 1.5 $\sigma$ ) for the complex of the porcine p110 $\gamma$  and mouse  
26 p84 complex phased using the alphafold2 generated model. A zoom in of the interface of the p110 $\gamma$ -p84  
27 complex shows clear density across for the interfacial helices in p84 (green).



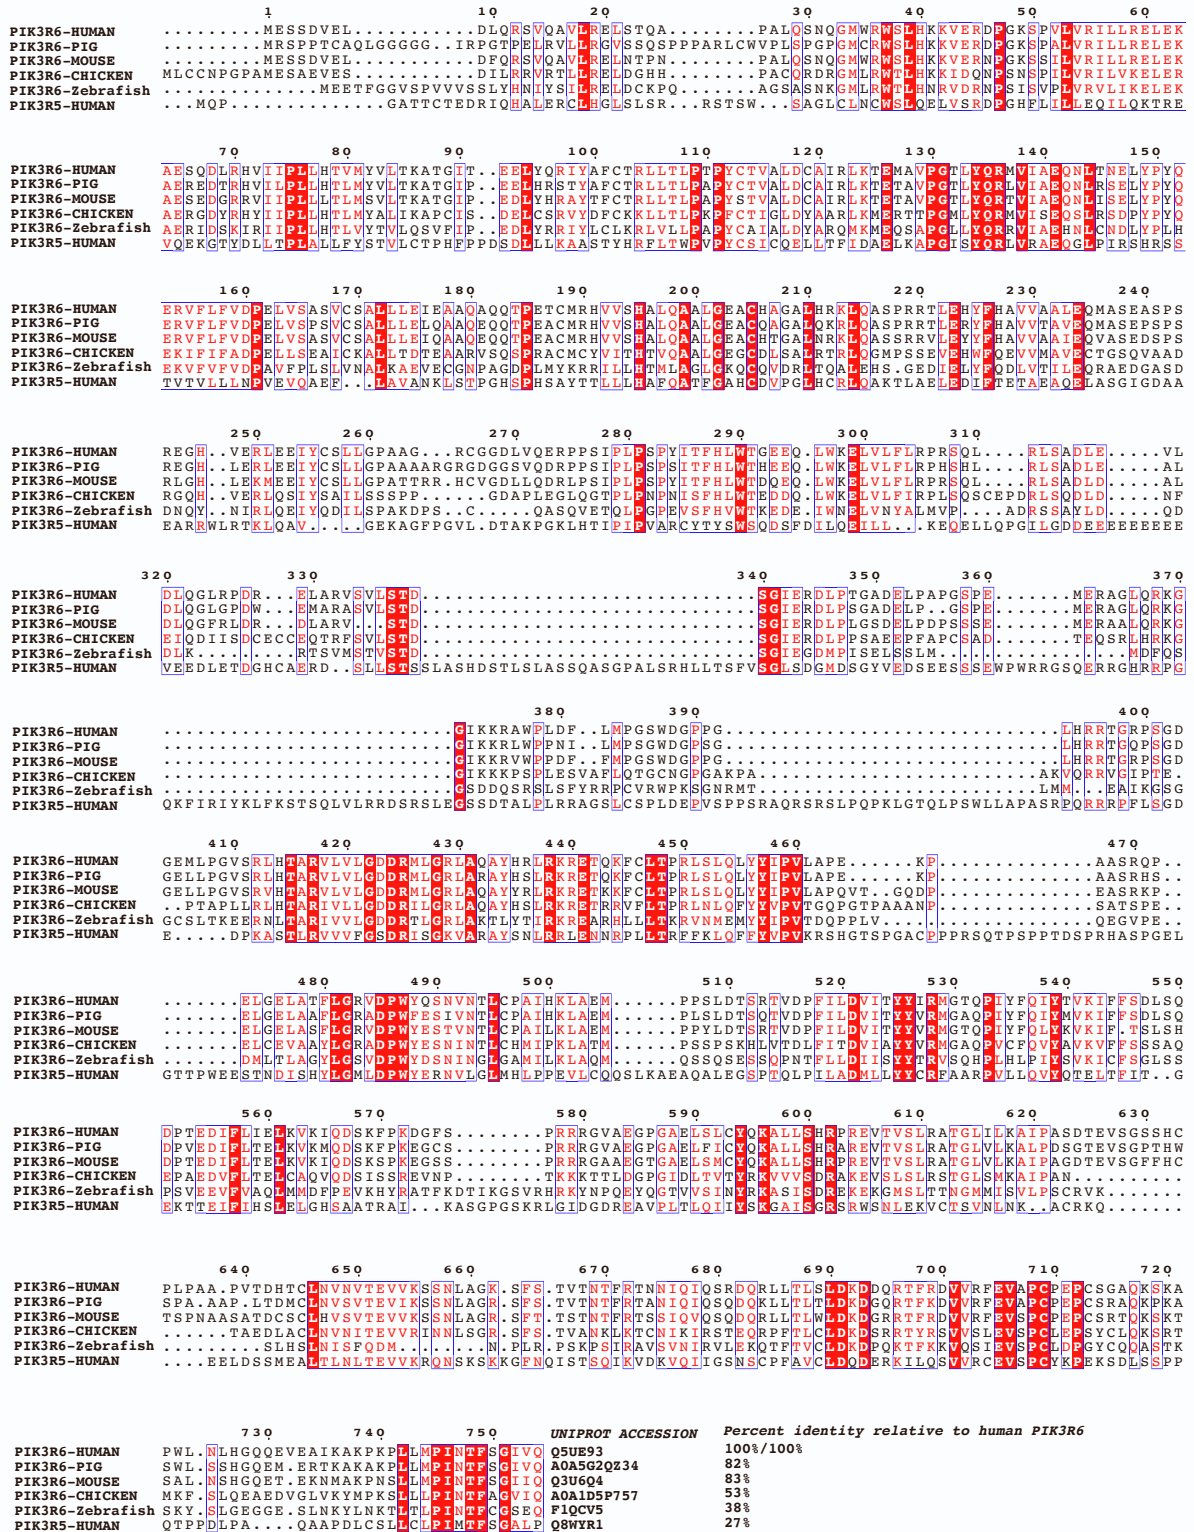

28

29

**Fig S3. Alignment of p84 orthologs (PIK3R6), and comparison to p101 (PIK3R5) (related to Fig 2)**

30

The alignment for the indicated genes is shown, with the UNIPROT accession numbers shown in the bottom

31

right, along with the percent identity compared to human PIK3R6.

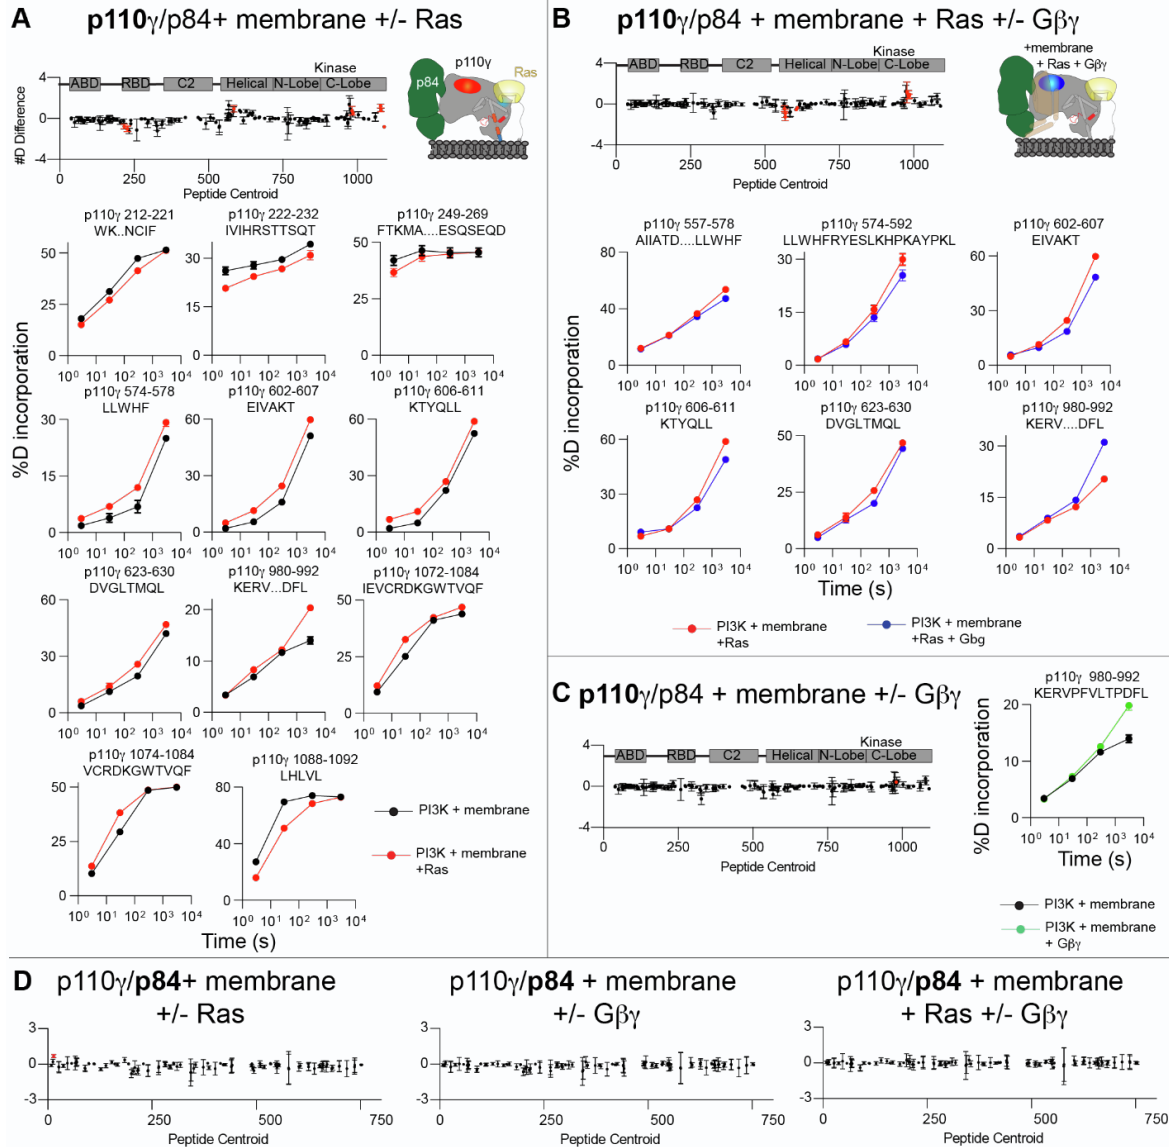

32  
33  
34  
35  
36  
37  
38  
39  
40  
41  
42  
43

**Fig S4. Raw HDX-MS data (A-D) (related to Fig 4).** The sum of the number of deuterium differences in the p110 $\gamma$  subunit between plasma membrane mimic vesicles and (A) plasma membrane mimic vesicles with 3  $\mu$ M GTP $\gamma$ S loaded lipidated Hras and (B) plasma membrane mimic vesicles with 3  $\mu$ M GTP $\gamma$ S loaded lipidated Hras 3  $\mu$ M G $\beta\gamma$  and (C) plasma membrane mimic vesicles with 3  $\mu$ M G $\beta\gamma$ . The sum of the number of deuterium differences in the p84 subunit under all conditions is shown in panel D. Each point is representative of the centre residue of an individual peptide. For all number of deuterium difference graphs the peptides that met the significance criteria are coloured red. Error is shown in the #D difference graphs as the sum of the standard deviation across all time points (n=3 for each time point). Selected deuterium exchange incorporation curves for peptides in the presence and absence of HRas and or G $\beta\gamma$  are shown below and are coloured according to the legend. Error in the %D peptide incorporation graphs is shown as standard deviation (n=3), with most error bars smaller than the size of the point.

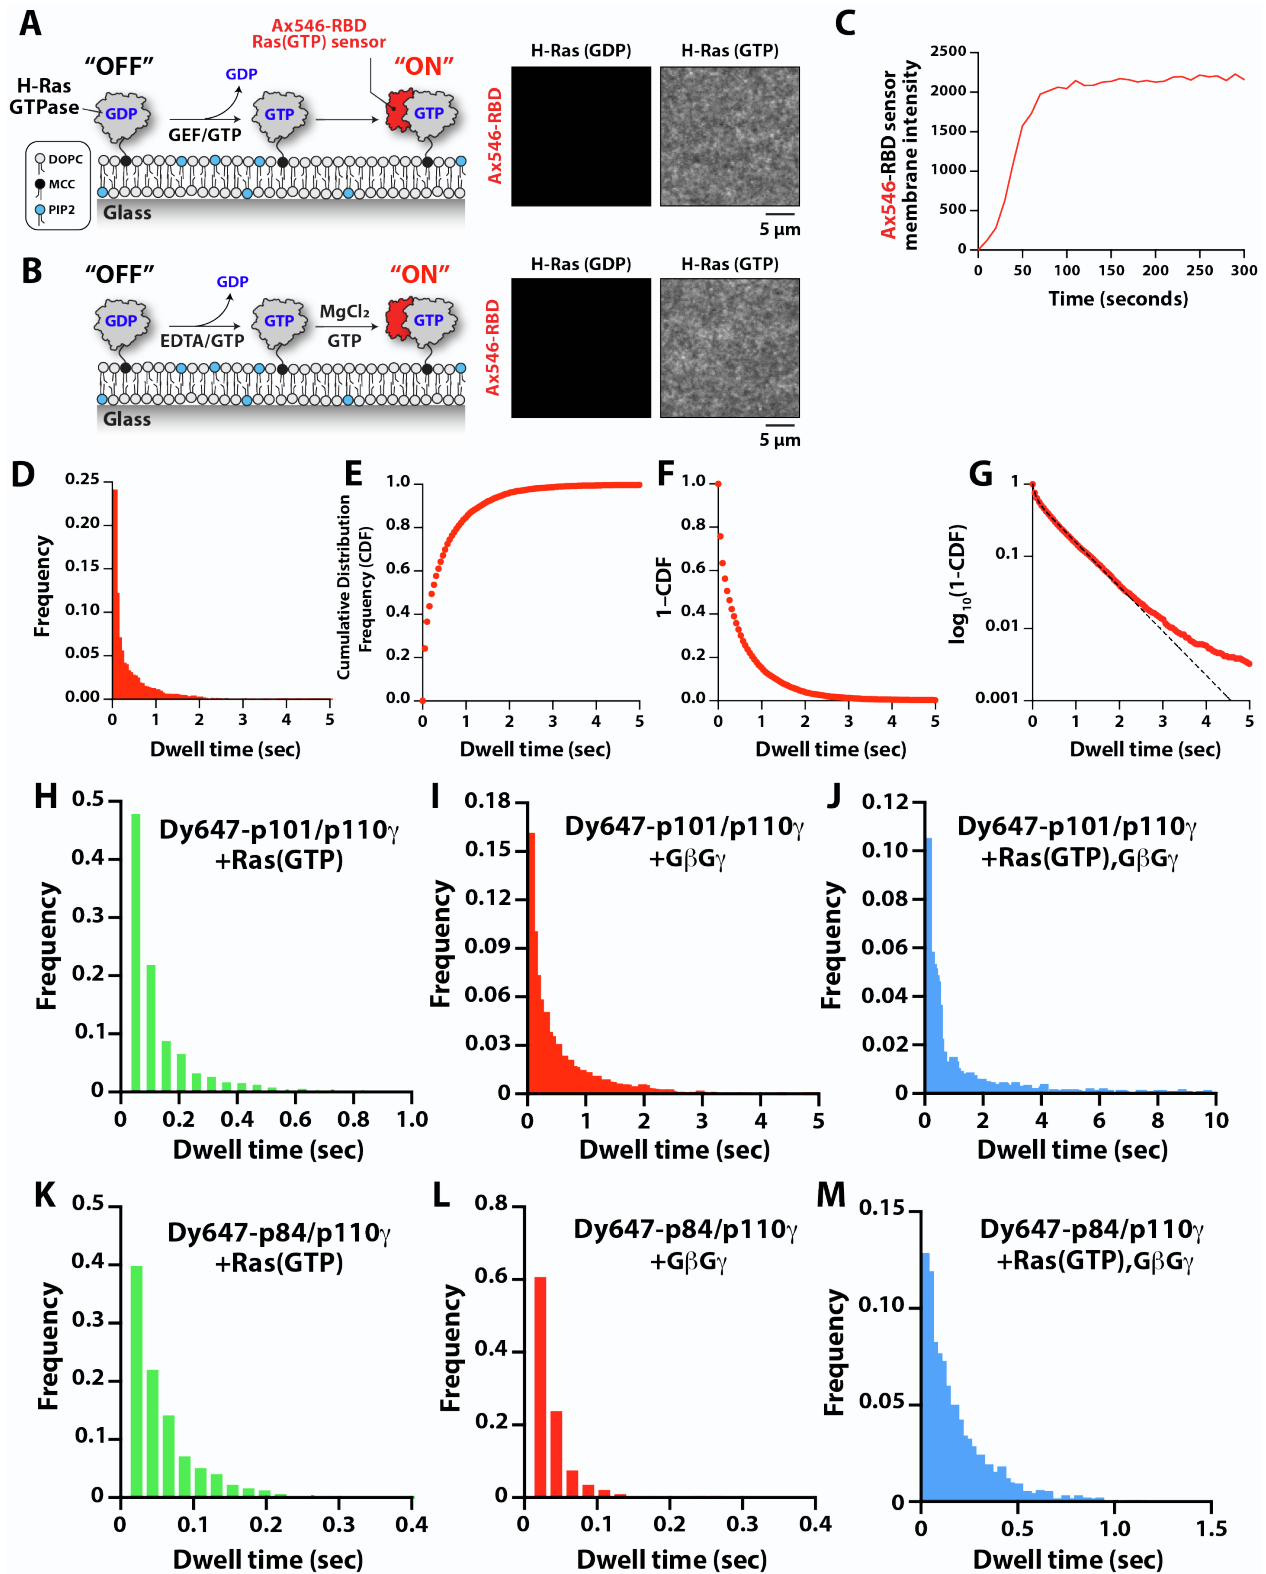

44

45 Fig S5. Validation of H-Ras supported membrane conjugation and activation and single molecule

46 TIRF-M dwell time distribution plots (related to Fig 5)

47 **A.** Scheme for activating membrane conjugated H-Ras with a guanine nucleotide exchange factor (GEF).  
48 Representative images showing the membrane localization of 50 nM Alexa546-SNAP-RBD visualized in  
49 the absence (left) or presence (right) of 50 nM SosCat. For all data in this figure the data shown is  
50 representative data, with full kinetic parameters shown in Table S3 generated from 2-4 technical replicates.  
51 **B.** Scheme for activating membrane conjugated H-Ras using EDTA-based nucleotide exchange of GDP  
52 for GTP. Representative images showing the membrane localization of 50 nM Alexa546-SNAP-RBD  
53 visualized before and after chemical activation of H-Ras.  
54 **C.** Kinetics of H-Ras activation measured in the presence of 50 nM SosCat (GEF) and 50 nM Alexa546-  
55 SNAP-RBD. Membrane composition for panels **A-C** was: 96% DOPC, 2% PI(4,5)P<sub>2</sub>, 2% MCC-PE. Images  
56 acquired using TIRF-M.  
57 **D-G.** Representative single molecule dwell distributions based on data collected in the presence of 10 pM  
58 DY647-p101-p110γ on SLBs containing Gβγ. Plot demonstrate workflow for generating single molecule  
59 dwell time distribution plots showing in Figure 5E-5F. **(D)** Frequency distribution plot. **(E)** Cumulative  
60 distribution frequency plot. **(F)** Inverse plot of cumulative distribution frequency plot (i.e. 1-CDF). **(G)** 1-CDF  
61 curve plotted on a log scale.  
62 **H-M.** Representative frequency distribution plots for the data sets plotted in Figure 5E-5F. Membrane  
63 composition for panels **H-M** was: 96% DOPC, 2% PI(4,5)P<sub>2</sub>, 2% MCC-PE. Data collected by smTIRF-M.  
64  
65  
66



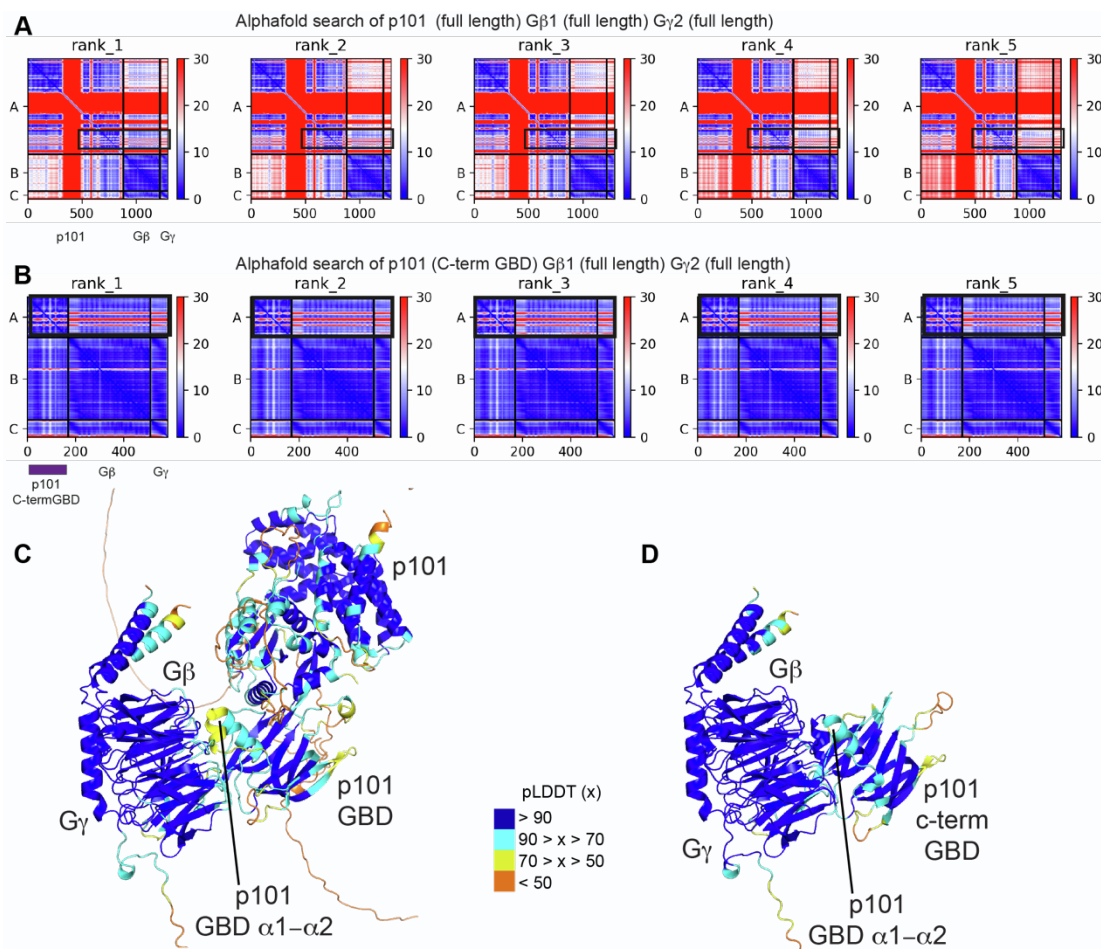

67

68 **Fig S6. AlphaFold2 multimer modelling of the complex between p101 and Gβγ (related to Fig 6)**

69 **A.** Predicted aligned error (PAE) for AlphaFold2 Multimer search of full length p101, Gβ1, and Gγ2. The  
 70 sequence of the two searches are indicated.

71 **B.** Predicted aligned error (PAE) for AlphaFold2 Multimer search of the C-terminus of p101, Gβ1, and Gγ2.

72 The sequence of the two searches are indicated, with a schematic indicated below. For both panels A+B,

73 the colours indicate the predicted aligned error, and are coloured according to the legend. Note that the

74 PAE plot is not an inter-residue distance map or a contact map. Instead, the red-blue colour

75 indicates expected distance error. The colour at (x, y) corresponds to the expected distance error in residue

76 x's position, when the prediction are aligned on residue y (more information can be found at

77 <https://alphafold.ebi.ac.uk/>)<sup>1,2</sup>. Blue is indicative of low PAE, with the low PAE at the p101-Gβγ interface in

78 both panels A+B suggests that AlphaFold2-multimer predicts the relative positions with high accuracy.

79 **C+D.** AlphaFold2 models from panels **A+B** shown with the per-residue confidence metric predicted local-

80 distance difference test (pLDDT) coloured according to the legend. The pLDDT score varies from 0 to 100,

81 and is an estimate of how well the prediction would agree with an experimental structure based on the local

82 distance difference test Ca<sup>1</sup>.

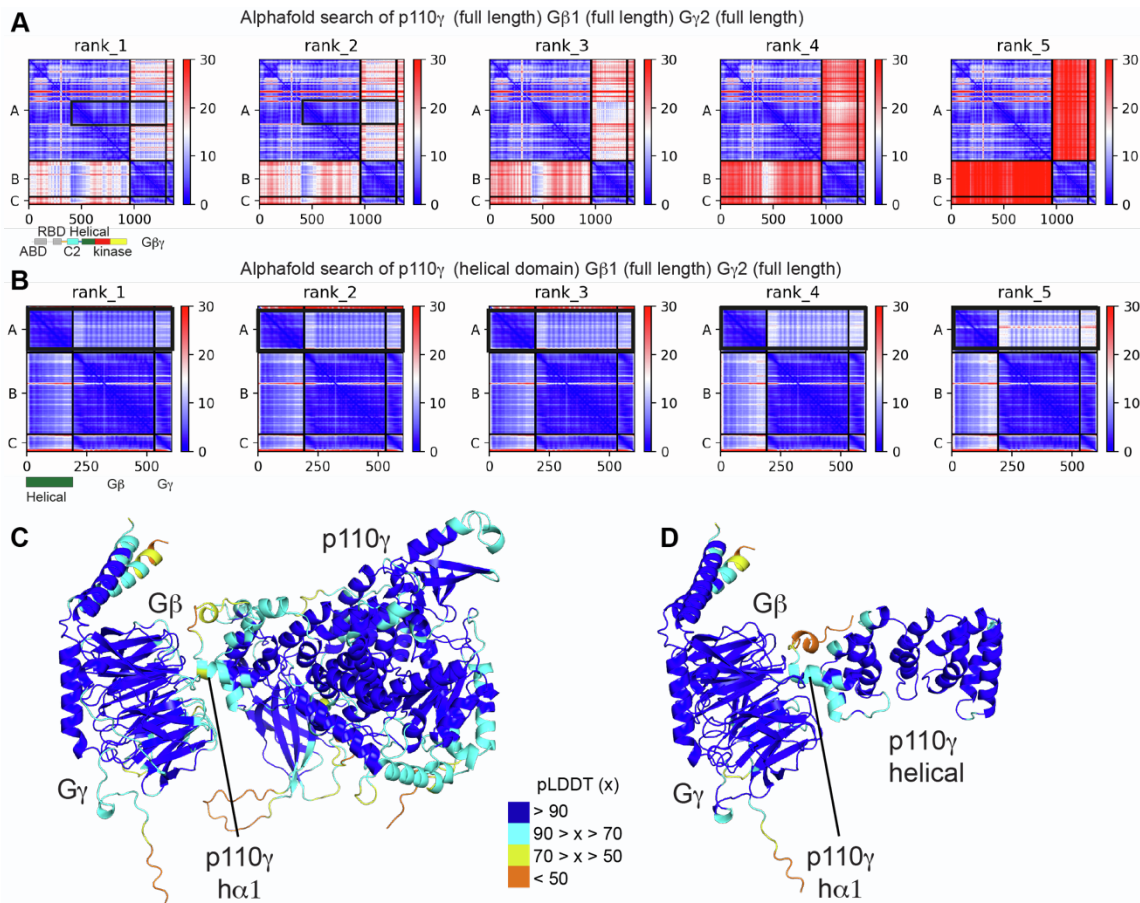

83

84 **Fig S7. AlphaFold2 multimer modelling of the complex between p110 $\gamma$  and G $\beta\gamma$  (related to Fig 6)**

85 **A.** Predicted aligned error (PAE) for AlphaFold2 Multimer search of full length p110 $\gamma$ , G $\beta$ 1, and G $\gamma$ 2. The  
 86 sequence of the two searches are indicated, with a schematic indicated below.

87 **B.** Predicted aligned error (PAE) for AlphaFold2 Multimer search of the helical domain of p110 $\gamma$ , and full  
 88 length G $\beta$ 1, and G $\gamma$ 2. The sequence of the two searches are indicated, with a schematic indicated below.

89 For both panels A+B, the colours indicate the predicted aligned error, and are coloured according to the  
 90 legend. Note that the PAE plot is not an inter-residue distance map or a contact map. Instead, the red-blue  
 91 colour indicates expected distance error. The colour at (x, y) corresponds to the expected distance error in  
 92 residue x's position, when the prediction are aligned on residue y (more information can be found at  
 93 <https://alphafold.ebi.ac.uk/>)<sup>1,2</sup>. Blue is indicative of low PAE, with the low PAE at the helical domain-G $\beta\gamma$   
 94 interface in both panels A+B suggests that AlphaFold2-multimer predicts the relative positions with high  
 95 accuracy.

96 **C+D.** AlphaFold2 models from panels **A+B** shown with the per-residue confidence metric predicted local-  
 97 distance difference test (pLDDT) coloured according to the legend. The pLDDT score varies from 0 to 100,  
 98 and is an estimate of how well the prediction would agree with an experimental structure based on the local  
 99 distance difference test C $\alpha$  1.

100

101 **Table S1 X-ray Data collection and refinement statistics (related to Fig 1)**

|                                                     | p110γ p84              |
|-----------------------------------------------------|------------------------|
| <b>Data collection</b>                              |                        |
| Wavelength                                          | 0.9762                 |
| Space group                                         | C121                   |
| Cell dimensions                                     |                        |
| <i>a, b, c</i> (Å)                                  | 322.3, 166.6, 255.8    |
| $\alpha, \beta, \gamma$ (°)                         | 90, 114, 90            |
| Resolution (Å)                                      | 90.3 - 8.5 (8.89-8.5)* |
| <i>R</i> <sub>merge</sub>                           | 0.122 (0.39)           |
| <i>I</i> / $\sigma I$                               | 6.8 (4.4)              |
| CC1/2                                               | 0.99 (0.90)            |
| Completeness (%)                                    | 99.9%                  |
| Redundancy                                          | 5.8                    |
| <b>Refinement</b>                                   |                        |
| Resolution (Å)                                      | 90.3 - 8.5 (8.89-8.5)  |
| No. unique reflections                              | 10833 (1084)           |
| <i>R</i> <sub>work</sub> / <i>R</i> <sub>free</sub> | 27.9/33.9              |
| No. atoms                                           |                        |
| Protein                                             | 50,008                 |
| <i>B</i> -factors                                   |                        |
| Protein                                             | 545.9                  |
| Clash score                                         | 5.72                   |
| Ramachandran favored                                | 98.29                  |
| Ramachandran outliers                               | 0.07                   |
| Rotamer outliers                                    | 0.50                   |
| R.m.s. deviations                                   |                        |
| Bond lengths (Å)                                    | 0.004                  |
| Bond angles (°)                                     | 0.64                   |

102 \*Values in parentheses are for highest-resolution shell.

103 Number of crystals used for structure=1

104

105

106 **Table S2. HDX-MS data processing table (Related to Fig 2+4)**

|                                     | Figure 2D+E                                                                |            |              | Figure 2G                                                                  |                         |                         |                         |
|-------------------------------------|----------------------------------------------------------------------------|------------|--------------|----------------------------------------------------------------------------|-------------------------|-------------------------|-------------------------|
| Protein Data Set                    | p110γ apo                                                                  | p110γ -p84 | P110 γ -p101 | p110γ -p84 high                                                            | p110γ -p84 low          | p110γ -p101 high        | p110γ -p101 low         |
| HDX reaction details                | %D <sub>2</sub> O= 91.7%<br>pH(read)= 7.5<br>Temp= 18°C                    |            |              | %D <sub>2</sub> O= 47.2%<br>pH(read)= 7.5<br>Temp= 18°C                    |                         |                         |                         |
| HDX time course                     | 3s, 30s, 300s, 3000s at 18°C<br><br>3s at 4°C                              |            |              | 30s, 300s                                                                  |                         |                         |                         |
| HDX controls                        | N/A                                                                        |            |              | N/A                                                                        |                         |                         |                         |
| Back-exchange                       | No correction for back exchange, only correction was for %D <sub>2</sub> O |            |              | No correction for back exchange, only correction was for %D <sub>2</sub> O |                         |                         |                         |
| Number of peptides                  | 166                                                                        |            |              | 173                                                                        |                         |                         |                         |
| Sequence coverage                   | 94.4                                                                       |            |              | 75.7                                                                       |                         |                         |                         |
| Average peptide length / Redundancy | Length = 12.9<br>Redundancy = 1.9                                          |            |              | Length = 10<br>Redundancy = 1.6                                            |                         |                         |                         |
| Replicates                          | 3                                                                          | 3          | 3            | 3 for 30s<br>2 for 300s                                                    | 3 for 30s<br>2 for 300s | 3 for 30s<br>2 for 300s | 3 for 30s<br>2 for 300s |
| Repeatability<br>Average SD =       | 0.6%                                                                       | 0.6%       | 0.6%         | 1.1%                                                                       | 1.6%                    | 1.2%                    | 1.0%                    |
| Significant differences in HDX      | >5% and >0.4 Da and unpaired t-test <0.01                                  |            |              | >7% and >0.5 Da and unpaired t-test <0.01                                  |                         |                         |                         |

107 SD = standard deviation from 3 technical replicates

108

109

110

111

112

113

114

115

116



117 **Table S2. HDX-MS data processing table (cont.)**

|                                     | Figure 4                                                                                     |                        |                      |                       |                           |
|-------------------------------------|----------------------------------------------------------------------------------------------|------------------------|----------------------|-----------------------|---------------------------|
| Protein Data Set                    | p110γ - p84 apo                                                                              | p110γ-p84 memb         | p110γ -p84 Ras+ memb | p110γ -p84 Gby+ memb  | p110γ -p84 Gby+Ras + memb |
| HDX reaction details                | %D <sub>2</sub> O= 65.5%<br>pH(read)= 7.5<br>Temp= 18°C                                      |                        |                      |                       |                           |
| HDX time course                     | 3s, 30s, 300s, 3000s                                                                         |                        |                      |                       |                           |
| HDX controls                        | N/A                                                                                          |                        |                      |                       |                           |
| Back-exchange                       | Corrected based on %D <sub>2</sub> O                                                         |                        |                      |                       |                           |
| Number of peptides                  | 148 for p110γ, 100 for p84                                                                   |                        |                      |                       |                           |
| Sequence coverage                   | p110= 85.2<br>p85= 85.8                                                                      |                        |                      |                       |                           |
| Average peptide length / Redundancy | p110 Length = 13.1<br>p110 Redundancy = 1.8<br><br>p85 Length = 12.9<br>p85 Redundancy = 1.8 |                        |                      |                       |                           |
| Replicates                          | 3                                                                                            | 3                      | 3                    | 3                     | 3                         |
| Repeatability Average SD            | p110=0.6%<br>p84 =0.7%                                                                       | p110=0.7%<br>p84= 0.9% | p110=0.7%<br>P84=1%  | p110=0.7%<br>P84=0.9% | p110=0.7%<br>P84=0.9%     |
| Significant differences in HDX      | >5% and >0.4 Da and unpaired t-test <0.01                                                    |                        |                      |                       |                           |

118

119 SD = standard deviation from 3 technical replicates

120

121

122

123

124

125

126

127

128 **TABLE S3. Single molecule TIRF microscopy parameters (related to Fig 5)**

129

| DY647-PI3K visualized | input                | $\tau_1 \pm SD$ (s) | $\tau_2 \pm SD$ (s) | $\alpha \pm SD$ | <i>N</i> | $D_1 \pm SD$ ( $\mu\text{m}^2/\text{s}$ ) | $D_2 \pm SD$ ( $\mu\text{m}^2/\text{s}$ ) | $\alpha \pm SD$ | steps  |
|-----------------------|----------------------|---------------------|---------------------|-----------------|----------|-------------------------------------------|-------------------------------------------|-----------------|--------|
| p84-p110 $\gamma$     | Ras                  | 0.041 $\pm$ 0.004   | 0.146 $\pm$ 0.05    | 0.81 $\pm$ 0.05 | 9741     | 0.215 $\pm$ 0.024                         | 1.09 $\pm$ 0.028                          | 0.23 $\pm$ 0.04 | 34896  |
| p84-p110 $\gamma$     | G $\beta\gamma$      | 0.024 $\pm$ 0.001   | —                   | —               | 11003    | n.d.                                      | n.d.                                      | n.d.            | n.d.   |
| p84-p110 $\gamma$     | Ras, G $\beta\gamma$ | 0.042 $\pm$ 0.009   | 0.194 $\pm$ 0.01    | 0.10 $\pm$ 0.03 | 5134     | 0.045 $\pm$ 0.011                         | 0.137 $\pm$ 0.021                         | 0.36 $\pm$ 0.11 | 44104  |
|                       |                      |                     |                     |                 |          |                                           |                                           |                 |        |
| p101-p110 $\gamma$    | Ras                  | 0.059 $\pm$ 0.003   | 0.324 $\pm$ 0.04    | 0.79 $\pm$ 0.04 | 6952     | 0.078 $\pm$ 0.06                          | 0.640 $\pm$ 0.023                         | 0.37 $\pm$ 0.04 | 19683  |
| p101-p110 $\gamma$    | G $\beta\gamma$      | 0.399 $\pm$ 0.111   | 1.06 $\pm$ 0.31     | 0.53 $\pm$ 0.15 | 11414    | 0.095 $\pm$ 0.007                         | 0.291 $\pm$ 0.042                         | 0.59 $\pm$ 0.08 | 152632 |
| p101-p110 $\gamma$    | Ras, G $\beta\gamma$ | 0.549 $\pm$ 0.069   | 7.83 $\pm$ 1.34     | 0.67 $\pm$ 0.08 | 2790     | 0.014 $\pm$ 0.005                         | 0.039 $\pm$ 0.008                         | 0.49 $\pm$ 0.04 | 86469  |

130

131 SD = standard deviation from 2-4 technical replicates

132 *N* = total number of molecules tracked in 2-4 technical replicates

133 steps = total number of particle displacements measured in 2-4 technical replicates

134 alpha ( $\alpha$ ) = fraction of molecules with characteristic dwell time ( $\tau_1$ ) or diffusion coefficient ( $D_1$ ).

135 membrane composition: 96% DOPC, 2% PI(4,5)P<sub>2</sub>, 2% MCC-PE. Ras = Ras(GTP)

136 n.d. = not determined

137

138

139

140

141

142

143

144

145

146

147

148

149

150

151

152

153

154 **Supplemental Alphafold models (related to Fig 6)**

155 The following PDB files from the highest ranked alphafold-multimer searches of the Gβγ interface of  
156 p110γ and p101 are attached (**details on model quality in Fig S6 and S7**)

157 1. p101\_CTD\_Gbg\_Alphafold\_Final\_model

158 2. p101\_Gbg\_Alphafold\_Final\_model

159 3. p110\_helical\_Gbg\_Alphafold\_Final\_model

160 4. p110\_dABD\_Gbg\_Alphafold\_Final\_model

161 Residues with pLDDT scores less than 50 have been removed.

162

163 **Supplemental references**

164 1. Jumper, J., Evans, R., Pritzel, A., Green, T., Figurnov, M., Ronneberger, O., Tunyasuvunakool, K.,  
165 Bates, R., Žídek, A., Potapenko, A., et al. (2021). Highly accurate protein structure prediction with  
166 AlphaFold. *Nature* 596, 583–589. 10.1038/s41586-021-03819-2.

167 2. Varadi, M., Anyango, S., Deshpande, M., Nair, S., Natassia, C., Yordanova, G., Yuan, D., Stroe, O.,  
168 Wood, G., Laydon, A., et al. (2022). AlphaFold Protein Structure Database: massively expanding the  
169 structural coverage of protein-sequence space with high-accuracy models. *Nucleic Acids Research* 50,  
170 D439–D444. 10.1093/nar/gkab1061.

171
